# Supplementary material for: Fabrication of a graphite-paraffin carbon paste electrode and demonstration of its use in electrochemical detection strategies
Source: Royal Society of Chemistry journal article supplement (doi:10.1039/d4an00392f), 2024-01-01
Supplement: d4an00392f1.zip [file d4an00392f1.zip]

## Sheet: Sheet1
CV i vs E Scan 1 Channel 1		CV i vs E Scan 2 Channel 1		CV i vs E Scan 3 Channel 1		CV i vs E Scan 4 Channel 1		CV i vs E Scan 5 Channel 1		CV i vs E Scan 6 Channel 1		CV i vs E Scan 7 Channel 1		CV i vs E Scan 8 Channel 1		CV i vs E Scan 9 Channel 1		CV i vs E Scan 10 Channel 1		CV i vs E Scan 1 Channel 2		CV i vs E Scan 2 Channel 2		CV i vs E Scan 3 Channel 2		CV i vs E Scan 4 Channel 2		CV i vs E Scan 5 Channel 2		CV i vs E Scan 6 Channel 2		CV i vs E Scan 7 Channel 2		CV i vs E Scan 8 Channel 2		CV i vs E Scan 9 Channel 2		CV i vs E Scan 10 Channel 2		CV i vs E Scan 1 Channel 3		CV i vs E Scan 2 Channel 3		CV i vs E Scan 3 Channel 3		CV i vs E Scan 4 Channel 3		CV i vs E Scan 5 Channel 3
V	µA	V	µA	V	µA	V	µA	V	µA	V	µA	V	µA	V	µA	V	µA	V	µA	V	µA	V	µA	V	µA	V	µA	V	µA	V	µA	V	µA	V	µA	V	µA	V	µA	V	µA	V	µA	V	µA	V	µA	V	µA
3.91006e-05	-0.000569582	3.91006e-05	-0.0160616	3.91006e-05	-0.0203646	3.91006e-05	-0.0200733	3.91006e-05	-0.0231932	3.91006e-05	-0.0329884	3.91006e-05	-0.0361461	3.91006e-05	-0.038278	3.91006e-05	-0.0409731	3.91006e-05	-0.0433754	3.91006e-05	-0.000606298	3.91006e-05	-0.0153196	3.91006e-05	-0.0200842	3.91006e-05	-0.0242451	3.91006e-05	-0.028026	3.91006e-05	-0.0316743	3.91006e-05	-0.0349964	3.91006e-05	-0.0381874	3.91006e-05	-0.0413036	3.91006e-05	-0.0443076	3.91006e-05	-0.000688796	3.91006e-05	-0.0127728	3.91006e-05	-0.0171025	3.91006e-05	-0.0211008	3.91006e-05	-0.0248164
-0.0199614	-0.00174213	-0.0199614	-0.0169304	-0.0199614	-0.0212658	-0.0199614	-0.0213116	-0.0199614	-0.0246366	-0.0199614	-0.0344313	-0.0199614	-0.0378794	-0.0199614	-0.0398578	-0.0199614	-0.0426649	-0.0199614	-0.0451159	-0.0199614	-0.00156856	-0.0199614	-0.0160673	-0.0199614	-0.0209163	-0.0199614	-0.0252594	-0.0199614	-0.0291895	-0.0199614	-0.0329307	-0.0199614	-0.0363921	-0.0199614	-0.0396833	-0.0199614	-0.0429038	-0.0199614	-0.0460505	-0.0199614	-0.00144983	-0.0199614	-0.0133513	-0.0199614	-0.0179032	-0.0199614	-0.0220779	-0.0199614	-0.0259665
-0.0399609	-0.00252367	-0.0399609	-0.017722	-0.0399609	-0.0222329	-0.0399609	-0.0227908	-0.0399609	-0.0262798	-0.0399609	-0.0358209	-0.0399609	-0.0393395	-0.0399609	-0.0415482	-0.0399609	-0.0440439	-0.0399609	-0.046801	-0.0399609	-0.00225664	-0.0399609	-0.016753	-0.0399609	-0.0217927	-0.0399609	-0.0263785	-0.0399609	-0.0304111	-0.0399609	-0.034244	-0.0399609	-0.0378732	-0.0399609	-0.0411586	-0.0399609	-0.0445618	-0.0399609	-0.0477642	-0.0399609	-0.0020001	-0.0399609	-0.0139974	-0.0399609	-0.018792	-0.0399609	-0.0231436	-0.0399609	-0.0271906
-0.0599613	-0.00320412	-0.0599613	-0.0185025	-0.0599613	-0.0232991	-0.0599613	-0.0242094	-0.0599613	-0.0280975	-0.0599613	-0.0373138	-0.0599613	-0.0408672	-0.0599613	-0.0434622	-0.0599613	-0.0463499	-0.0599613	-0.0487956	-0.0599613	-0.00288273	-0.0599613	-0.0175079	-0.0599613	-0.0227245	-0.0599613	-0.027479	-0.0599613	-0.0316209	-0.0599613	-0.035601	-0.0599613	-0.0393313	-0.0599613	-0.0428075	-0.0599613	-0.0462398	-0.0599613	-0.0494947	-0.0599613	-0.00251699	-0.0599613	-0.0146764	-0.0599613	-0.0196522	-0.0599613	-0.0242046	-0.0599613	-0.0283788
-0.0798826	-0.00380494	-0.0798826	-0.0193713	-0.0798826	-0.0244235	-0.0798826	-0.0258029	-0.0798826	-0.0299243	-0.0798826	-0.0388049	-0.0798826	-0.0423807	-0.0798826	-0.045061	-0.0798826	-0.048264	-0.0798826	-0.050734	-0.0798826	-0.00348927	-0.0798826	-0.0182842	-0.0798826	-0.0236801	-0.0798826	-0.0285557	-0.0798826	-0.0328869	-0.0798826	-0.03696	-0.0798826	-0.0407595	-0.0798826	-0.0443944	-0.0798826	-0.047831	-0.0798826	-0.0512714	-0.0798826	-0.003011	-0.0798826	-0.0153492	-0.0798826	-0.0205601	-0.0798826	-0.0252455	-0.0798826	-0.0295809
-0.0998831	-0.00440099	-0.0998831	-0.0201805	-0.0998831	-0.0253604	-0.0998831	-0.0273126	-0.0998831	-0.0316652	-0.0998831	-0.0405497	-0.0998831	-0.0439057	-0.0998831	-0.0471634	-0.0998831	-0.0502328	-0.0998831	-0.052674	-0.0998831	-0.00409485	-0.0998831	-0.0190466	-0.0998831	-0.0246309	-0.0998831	-0.0297087	-0.0998831	-0.0341596	-0.0998831	-0.0383414	-0.0998831	-0.0422911	-0.0998831	-0.0459146	-0.0998831	-0.0495781	-0.0998831	-0.0530078	-0.0998831	-0.00350214	-0.0998831	-0.0160244	-0.0998831	-0.0214384	-0.0998831	-0.0263475	-0.0998831	-0.0308393
-0.119884	-0.00498178	-0.119884	-0.0210908	-0.119884	-0.0267118	-0.119884	-0.0287775	-0.119884	-0.0335363	-0.119884	-0.0421194	-0.119884	-0.0456299	-0.119884	-0.048376	-0.119884	-0.0521781	-0.119884	-0.0547482	-0.119884	-0.00468709	-0.119884	-0.0198639	-0.119884	-0.0256194	-0.119884	-0.0308303	-0.119884	-0.0354451	-0.119884	-0.0397863	-0.119884	-0.0438031	-0.119884	-0.0474891	-0.119884	-0.0513486	-0.119884	-0.0547721	-0.119884	-0.00399949	-0.119884	-0.0167173	-0.119884	-0.0223516	-0.119884	-0.0274457	-0.119884	-0.0320872
-0.139883	-0.00555398	-0.139883	-0.0219415	-0.139883	-0.0275782	-0.139883	-0.0303477	-0.139883	-0.0353898	-0.139883	-0.0436672	-0.139883	-0.0473852	-0.139883	-0.050301	-0.139883	-0.0540282	-0.139883	-0.0568893	-0.139883	-0.00530507	-0.139883	-0.020707	-0.139883	-0.0266274	-0.139883	-0.0319914	-0.139883	-0.0367431	-0.139883	-0.0412048	-0.139883	-0.0453095	-0.139883	-0.0491518	-0.139883	-0.0529363	-0.139883	-0.0565126	-0.139883	-0.00447871	-0.139883	-0.0174597	-0.139883	-0.0232948	-0.139883	-0.0285677	-0.139883	-0.0333289
-0.159883	-0.00614669	-0.159883	-0.0228027	-0.159883	-0.0286945	-0.159883	-0.0318435	-0.159883	-0.0371541	-0.159883	-0.0453524	-0.159883	-0.0489425	-0.159883	-0.0527932	-0.159883	-0.051501	-0.159883	-0.059078	-0.159883	-0.00590589	-0.159883	-0.0215786	-0.159883	-0.0277127	-0.159883	-0.0333008	-0.159883	-0.0381454	-0.159883	-0.0426602	-0.159883	-0.0468797	-0.159883	-0.0507712	-0.159883	-0.054753	-0.159883	-0.0584342	-0.159883	-0.00498797	-0.159883	-0.0182522	-0.159883	-0.0242761	-0.159883	-0.0297154	-0.159883	-0.0346788
-0.179883	-0.00675085	-0.179883	-0.0236219	-0.179883	-0.0299047	-0.179883	-0.0333346	-0.179883	-0.0389227	-0.179883	-0.0470123	-0.179883	-0.0511593	-0.179883	-0.0540092	-0.179883	-0.0538041	-0.179883	-0.0611045	-0.179883	-0.00651958	-0.179883	-0.0224126	-0.179883	-0.0287927	-0.179883	-0.0344828	-0.179883	-0.0394901	-0.179883	-0.0441179	-0.179883	-0.0484304	-0.179883	-0.0524833	-0.179883	-0.0564315	-0.179883	-0.0602844	-0.179883	-0.00551202	-0.179883	-0.018976	-0.179883	-0.0252865	-0.179883	-0.0308655	-0.179883	-0.0359339
-0.199883	-0.00737312	-0.199883	-0.0242394	-0.199883	-0.0307902	-0.199883	-0.0347685	-0.199883	-0.0407924	-0.199883	-0.0486912	-0.199883	-0.0525119	-0.199883	-0.0563791	-0.199883	-0.054548	-0.199883	-0.0633075	-0.199883	-0.00716761	-0.199883	-0.0233291	-0.199883	-0.02991	-0.199883	-0.0356902	-0.199883	-0.0408544	-0.199883	-0.0456185	-0.199883	-0.0501036	-0.199883	-0.0542142	-0.199883	-0.058234	-0.199883	-0.0621297	-0.199883	-0.00604894	-0.199883	-0.0197967	-0.199883	-0.0263008	-0.199883	-0.0320791	-0.199883	-0.0372676
-0.219806	-0.00804022	-0.219806	-0.0251087	-0.219806	-0.0318903	-0.219806	-0.0363249	-0.219806	-0.0427102	-0.219806	-0.0506134	-0.219806	-0.0546815	-0.219806	-0.057781	-0.219806	-0.0589254	-0.219806	-0.0654724	-0.219806	-0.00791767	-0.219806	-0.0242747	-0.219806	-0.0310186	-0.219806	-0.0370316	-0.219806	-0.042426	-0.219806	-0.0472507	-0.219806	-0.051768	-0.219806	-0.055988	-0.219806	-0.0601461	-0.219806	-0.0641897	-0.219806	-0.0066407	-0.219806	-0.0206254	-0.219806	-0.0274056	-0.219806	-0.0333213	-0.219806	-0.0386871
-0.239805	-0.00878027	-0.239805	-0.0260023	-0.239805	-0.0329584	-0.239805	-0.0379414	-0.239805	-0.0447954	-0.239805	-0.0525739	-0.239805	-0.0567081	-0.239805	-0.0596216	-0.239805	-0.0615289	-0.239805	-0.0678375	-0.239805	-0.00869254	-0.239805	-0.0252713	-0.239805	-0.0323232	-0.239805	-0.0384854	-0.239805	-0.0440721	-0.239805	-0.0490498	-0.239805	-0.0536611	-0.239805	-0.0579956	-0.239805	-0.0623586	-0.239805	-0.0663736	-0.239805	-0.00726011	-0.239805	-0.0215171	-0.239805	-0.0285424	-0.239805	-0.034706	-0.239805	-0.0402478
-0.259806	-0.00965575	-0.259806	-0.0271529	-0.259806	-0.0342955	-0.259806	-0.0397791	-0.259806	-0.0471186	-0.259806	-0.055001	-0.259806	-0.0590684	-0.259806	-0.0628736	-0.259806	-0.0649717	-0.259806	-0.0711706	-0.259806	-0.00962333	-0.259806	-0.0265206	-0.259806	-0.0338181	-0.259806	-0.0402364	-0.259806	-0.0459275	-0.259806	-0.0511555	-0.259806	-0.0559928	-0.259806	-0.060499	-0.259806	-0.0649955	-0.259806	-0.0691202	-0.259806	-0.00798586	-0.259806	-0.022632	-0.259806	-0.029857	-0.259806	-0.0362548	-0.259806	-0.0420374
-0.279806	-0.0106347	-0.279806	-0.0282858	-0.279806	-0.0357407	-0.279806	-0.0419177	-0.279806	-0.0495777	-0.279806	-0.0578048	-0.279806	-0.0621345	-0.279806	-0.0659063	-0.279806	-0.0689438	-0.279806	-0.0745132	-0.279806	-0.0107096	-0.279806	-0.0278896	-0.279806	-0.0355195	-0.279806	-0.0421929	-0.279806	-0.0482139	-0.279806	-0.0536563	-0.279806	-0.0587204	-0.279806	-0.063484	-0.279806	-0.0681522	-0.279806	-0.0725964	-0.279806	-0.00882128	-0.279806	-0.0237277	-0.279806	-0.0314215	-0.279806	-0.0380644	-0.279806	-0.044105
-0.299806	-0.0118335	-0.299806	-0.0298938	-0.299806	-0.0380386	-0.299806	-0.0445413	-0.299806	-0.0530443	-0.299806	-0.061548	-0.299806	-0.066221	-0.299806	-0.0698593	-0.299806	-0.0725487	-0.299806	-0.0793388	-0.299806	-0.0120581	-0.299806	-0.0295957	-0.299806	-0.0377492	-0.299806	-0.0448341	-0.299806	-0.0512824	-0.299806	-0.0570419	-0.299806	-0.0624778	-0.299806	-0.0676801	-0.299806	-0.0726107	-0.299806	-0.0773361	-0.299806	-0.00987987	-0.299806	-0.0252012	-0.299806	-0.0332984	-0.299806	-0.0403504	-0.299806	-0.0467543
-0.319806	-0.0133141	-0.319806	-0.0321072	-0.319806	-0.0407456	-0.319806	-0.0479812	-0.319806	-0.0572422	-0.319806	-0.0661495	-0.319806	-0.0711706	-0.319806	-0.0757816	-0.319806	-0.0797012	-0.319806	-0.08611	-0.319806	-0.0137218	-0.319806	-0.0317715	-0.319806	-0.0406899	-0.319806	-0.0484571	-0.319806	-0.055516	-0.319806	-0.0618055	-0.319806	-0.067704	-0.319806	-0.0734213	-0.319806	-0.0787857	-0.319806	-0.0840977	-0.319806	-0.011175	-0.319806	-0.0270032	-0.319806	-0.0358318	-0.319806	-0.0435046	-0.319806	-0.0503311
-0.339806	-0.0152429	-0.339806	-0.0354427	-0.339806	-0.0450162	-0.339806	-0.0532989	-0.339806	-0.0637176	-0.339806	-0.0732878	-0.339806	-0.0788191	-0.339806	-0.0834635	-0.339806	-0.0893048	-0.339806	-0.095909	-0.339806	-0.0159786	-0.339806	-0.0348658	-0.339806	-0.0448679	-0.339806	-0.0536551	-0.339806	-0.0616624	-0.339806	-0.0687435	-0.339806	-0.0755051	-0.339806	-0.0819901	-0.339806	-0.0881651	-0.339806	-0.0941876	-0.339806	-0.0128839	-0.339806	-0.0294918	-0.339806	-0.0392694	-0.339806	-0.0478291	-0.339806	-0.0554206
-0.359728	-0.0178197	-0.359728	-0.0396456	-0.359728	-0.0505509	-0.359728	-0.0607231	-0.359728	-0.0723723	-0.359728	-0.0833252	-0.359728	-0.0902346	-0.359728	-0.0959996	-0.359728	-0.103739	-0.359728	-0.110352	-0.359728	-0.0190571	-0.359728	-0.0391873	-0.359728	-0.051022	-0.359728	-0.0623634	-0.359728	-0.0707176	-0.359728	-0.0791147	-0.359728	-0.0871113	-0.359728	-0.0947741	-0.359728	-0.102241	-0.359728	-0.109394	-0.359728	-0.0151399	-0.359728	-0.0329875	-0.359728	-0.0443744	-0.359728	-0.054161	-0.359728	-0.0629547
-0.379728	-0.0214113	-0.379728	-0.0447301	-0.379728	-0.0586393	-0.379728	-0.0711086	-0.379728	-0.0851277	-0.379728	-0.097969	-0.379728	-0.106547	-0.379728	-0.114272	-0.379728	-0.123399	-0.379728	-0.131405	-0.379728	-0.0236219	-0.379728	-0.0457243	-0.379728	-0.0641897	-0.379728	-0.0730303	-0.379728	-0.0843409	-0.379728	-0.094798	-0.379728	-0.104783	-0.379728	-0.114282	-0.379728	-0.123404	-0.379728	-0.132096	-0.379728	-0.018329	-0.379728	-0.0381655	-0.379728	-0.0521049	-0.379728	-0.0636938	-0.379728	-0.0741556
-0.399728	-0.0267228	-0.399728	-0.0529565	-0.399728	-0.0709513	-0.399728	-0.0862101	-0.399728	-0.102775	-0.399728	-0.118182	-0.399728	-0.129006	-0.399728	-0.137809	-0.399728	-0.149749	-0.399728	-0.160192	-0.399728	-0.0303901	-0.399728	-0.0552573	-0.399728	-0.0741175	-0.399728	-0.0899056	-0.399728	-0.103987	-0.399728	-0.117181	-0.399728	-0.129731	-0.399728	-0.141557	-0.399728	-0.153015	-0.399728	-0.164483	-0.399728	-0.0229119	-0.399728	-0.0458307	-0.399728	-0.0628879	-0.399728	-0.0773647	-0.399728	-0.0901154
-0.419728	-0.034922	-0.419728	-0.0651386	-0.419728	-0.0881318	-0.419728	-0.107196	-0.419728	-0.126732	-0.419728	-0.145081	-0.419728	-0.158437	-0.419728	-0.170577	-0.419728	-0.184091	-0.419728	-0.19687	-0.419728	-0.0409116	-0.419728	-0.0696924	-0.419728	-0.0938348	-0.419728	-0.113628	-0.419728	-0.131257	-0.419728	-0.147789	-0.419728	-0.163162	-0.419728	-0.177844	-0.419728	-0.192111	-0.419728	-0.206364	-0.419728	-0.0298542	-0.419728	-0.0573315	-0.419728	-0.0791195	-0.419728	-0.096815	-0.419728	-0.112322
-0.439728	-0.0478515	-0.439728	-0.0834969	-0.439728	-0.112265	-0.439728	-0.135553	-0.439728	-0.15817	-0.439728	-0.179642	-0.439728	-0.195463	-0.439728	-0.210389	-0.439728	-0.226091	-0.439728	-0.241245	-0.439728	-0.0570946	-0.439728	-0.0910023	-0.439728	-0.121658	-0.439728	-0.146015	-0.439728	-0.167521	-0.439728	-0.18966	-0.439728	-0.205553	-0.439728	-0.223215	-0.439728	-0.240382	-0.439728	-0.2574	-0.439728	-0.0404457	-0.439728	-0.0748756	-0.439728	-0.102337	-0.439728	-0.123713	-0.439728	-0.142057
-0.459728	-0.0620327	-0.459728	-0.10989	-0.459728	-0.145276	-0.459728	-0.172919	-0.459728	-0.198601	-0.459728	-0.22281	-0.459728	-0.241016	-0.459728	-0.257839	-0.459728	-0.275849	-0.459728	-0.293311	-0.459728	-0.0813845	-0.459728	-0.121601	-0.459728	-0.159825	-0.459728	-0.188969	-0.459728	-0.213927	-0.459728	-0.236286	-0.459728	-0.257457	-0.459728	-0.277852	-0.459728	-0.297497	-0.459728	-0.317043	-0.459728	-0.0568013	-0.459728	-0.101045	-0.459728	-0.135172	-0.459728	-0.160068	-0.459728	-0.181049
-0.479729	-0.0970344	-0.479729	-0.14674	-0.479729	-0.188812	-0.479729	-0.220393	-0.479729	-0.248569	-0.479729	-0.274628	-0.479729	-0.294989	-0.479729	-0.313429	-0.479729	-0.333165	-0.479729	-0.3519	-0.479729	-0.11606	-0.479729	-0.163954	-0.479729	-0.210474	-0.479729	-0.243681	-0.479729	-0.271381	-0.479729	-0.295943	-0.479729	-0.319265	-0.479729	-0.341362	-0.479729	-0.362634	-0.479729	-0.384492	-0.479729	-0.0807884	-0.479729	-0.137923	-0.479729	-0.180138	-0.479729	-0.208162	-0.479729	-0.230707
-0.49965	-0.137919	-0.49965	-0.19605	-0.49965	-0.243886	-0.49965	-0.278896	-0.49965	-0.308188	-0.49965	-0.33585	-0.49965	-0.356964	-0.49965	-0.376219	-0.49965	-0.39658	-0.49965	-0.417403	-0.49965	-0.162223	-0.49965	-0.219367	-0.49965	-0.274294	-0.49965	-0.311307	-0.49965	-0.340389	-0.49965	-0.366262	-0.49965	-0.390219	-0.49965	-0.41315	-0.49965	-0.435528	-0.49965	-0.458726	-0.49965	-0.114325	-0.49965	-0.187	-0.49965	-0.237945	-0.49965	-0.268677	-0.49965	-0.291671
-0.51965	-0.190457	-0.51965	-0.25617	-0.51965	-0.311364	-0.51965	-0.348309	-0.51965	-0.378307	-0.51965	-0.405583	-0.51965	-0.427388	-0.51965	-0.446615	-0.51965	-0.466866	-0.51965	-0.487952	-0.51965	-0.220817	-0.51965	-0.288743	-0.51965	-0.351895	-0.51965	-0.391525	-0.51965	-0.420322	-0.51965	-0.446948	-0.51965	-0.470619	-0.51965	-0.493354	-0.51965	-0.515794	-0.51965	-0.539283	-0.51965	-0.158694	-0.51965	-0.249108	-0.51965	-0.309218	-0.51965	-0.342325	-0.51965	-0.364613
-0.539651	-0.255912	-0.539651	-0.328282	-0.539651	-0.390214	-0.539651	-0.428361	-0.539651	-0.457062	-0.539651	-0.484127	-0.539651	-0.504918	-0.539651	-0.52319	-0.539651	-0.543122	-0.539651	-0.564718	-0.539651	-0.292114	-0.539651	-0.371002	-0.539651	-0.441427	-0.539651	-0.483136	-0.539651	-0.511331	-0.539651	-0.536852	-0.539651	-0.559511	-0.539651	-0.581088	-0.539651	-0.603511	-0.539651	-0.626876	-0.539651	-0.214361	-0.539651	-0.323309	-0.539651	-0.392107	-0.539651	-0.427155	-0.539651	-0.448326
-0.55965	-0.334419	-0.55965	-0.412478	-0.55965	-0.47944	-0.55965	-0.516924	-0.55965	-0.544629	-0.55965	-0.570445	-0.55965	-0.591304	-0.55965	-0.607946	-0.55965	-0.627353	-0.55965	-0.648334	-0.55965	-0.376362	-0.55965	-0.465602	-0.55965	-0.542588	-0.55965	-0.585427	-0.55965	-0.613334	-0.55965	-0.637224	-0.55965	-0.657871	-0.55965	-0.677612	-0.55965	-0.697639	-0.55965	-0.721004	-0.55965	-0.282305	-0.55965	-0.408863	-0.55965	-0.485467	-0.55965	-0.522403	-0.55965	-0.542187
-0.579651	-0.424537	-0.579651	-0.507087	-0.579651	-0.577173	-0.579651	-0.614383	-0.579651	-0.641038	-0.579651	-0.664833	-0.579651	-0.683239	-0.579651	-0.698975	-0.579651	-0.71719	-0.579651	-0.737503	-0.579651	-0.473184	-0.579651	-0.570454	-0.579651	-0.652816	-0.579651	-0.696447	-0.579651	-0.721863	-0.579651	-0.744036	-0.579651	-0.763157	-0.579651	-0.781658	-0.579651	-0.799253	-0.579651	-0.821475	-0.579651	-0.362596	-0.579651	-0.503821	-0.579651	-0.586123	-0.579651	-0.625589	-0.579651	-0.64471
-0.59965	-0.525927	-0.59965	-0.610807	-0.59965	-0.682189	-0.59965	-0.717571	-0.59965	-0.741461	-0.59965	-0.76454	-0.59965	-0.781992	-0.59965	-0.796059	-0.59965	-0.81208	-0.59965	-0.832299	-0.59965	-0.579953	-0.59965	-0.684478	-0.59965	-0.768545	-0.59965	-0.812558	-0.59965	-0.836447	-0.59965	-0.857047	-0.59965	-0.874403	-0.59965	-0.891331	-0.59965	-0.906876	-0.59965	-0.928715	-0.59965	-0.454158	-0.59965	-0.607517	-0.59965	-0.693157	-0.59965	-0.733307	-0.59965	-0.75095
-0.579651	-0.498416	-0.579651	-0.573089	-0.579651	-0.633743	-0.579651	-0.659254	-0.579651	-0.678041	-0.579651	-0.690153	-0.579651	-0.702408	-0.579651	-0.711086	-0.579651	-0.720098	-0.579651	-0.736168	-0.579651	-0.54486	-0.579651	-0.640705	-0.579651	-0.712326	-0.579651	-0.746754	-0.579651	-0.763252	-0.579651	-0.77689	-0.579651	-0.788048	-0.579651	-0.798872	-0.579651	-0.809172	-0.579651	-0.824383	-0.579651	-0.430226	-0.579651	-0.569513	-0.579651	-0.642898	-0.579651	-0.674846	-0.579651	-0.687006
-0.55965	-0.463559	-0.55965	-0.531747	-0.55965	-0.584056	-0.55965	-0.60313	-0.55965	-0.614431	-0.55965	-0.625398	-0.55965	-0.634172	-0.55965	-0.640132	-0.55965	-0.644901	-0.55965	-0.658681	-0.55965	-0.5039	-0.55965	-0.593498	-0.55965	-0.655534	-0.55965	-0.683763	-0.55965	-0.696114	-0.55965	-0.706032	-0.55965	-0.713327	-0.55965	-0.720146	-0.55965	-0.727728	-0.55965	-0.739601	-0.55965	-0.400008	-0.55965	-0.526883	-0.55965	-0.590827	-0.55965	-0.617054	-0.55965	-0.626161
-0.539651	-0.421311	-0.539651	-0.482442	-0.539651	-0.528171	-0.539651	-0.543191	-0.539651	-0.551488	-0.539651	-0.560119	-0.539651	-0.567081	-0.539651	-0.571468	-0.539651	-0.573852	-0.539651	-0.586011	-0.539651	-0.456311	-0.539651	-0.538804	-0.539651	-0.592687	-0.539651	-0.616863	-0.539651	-0.62659	-0.539651	-0.633647	-0.539651	-0.639179	-0.539651	-0.645473	-0.539651	-0.650098	-0.539651	-0.659969	-0.539651	-0.362953	-0.539651	-0.477435	-0.539651	-0.532891	-0.539651	-0.555398	-0.539651	-0.562026
-0.51965	-0.372578	-0.51965	-0.427271	-0.51965	-0.466516	-0.51965	-0.47877	-0.51965	-0.485112	-0.51965	-0.492742	-0.51965	-0.498702	-0.51965	-0.501945	-0.51965	-0.503804	-0.51965	-0.514581	-0.51965	-0.403	-0.51965	-0.476815	-0.51965	-0.523831	-0.51965	-0.544621	-0.51965	-0.552871	-0.51965	-0.558879	-0.51965	-0.563552	-0.51965	-0.568273	-0.51965	-0.573089	-0.51965	-0.581481	-0.51965	-0.320362	-0.51965	-0.421263	-0.51965	-0.469567	-0.51965	-0.488593	-0.51965	-0.494363
-0.49965	-0.318314	-0.49965	-0.365759	-0.49965	-0.399043	-0.49965	-0.409342	-0.49965	-0.41516	-0.49965	-0.421931	-0.49965	-0.42751	-0.49965	-0.431134	-0.49965	-0.43285	-0.49965	-0.442817	-0.49965	-0.34454	-0.49965	-0.408722	-0.49965	-0.448968	-0.49965	-0.466611	-0.49965	-0.475051	-0.49965	-0.48001	-0.49965	-0.484397	-0.49965	-0.489118	-0.49965	-0.493695	-0.49965	-0.501563	-0.49965	-0.273179	-0.49965	-0.359608	-0.49965	-0.400568	-0.49965	-0.417115	-0.49965	-0.422217
-0.479729	-0.261284	-0.479729	-0.300957	-0.479729	-0.328042	-0.479729	-0.337626	-0.479729	-0.342967	-0.479729	-0.349452	-0.479729	-0.354649	-0.479729	-0.358702	-0.479729	-0.360705	-0.479729	-0.369622	-0.479729	-0.283695	-0.479729	-0.337054	-0.479729	-0.370575	-0.479729	-0.385882	-0.479729	-0.394131	-0.479729	-0.398947	-0.479729	-0.403286	-0.479729	-0.408436	-0.479729	-0.41268	-0.479729	-0.420262	-0.479729	-0.223807	-0.479729	-0.294901	-0.479729	-0.328518	-0.479729	-0.343014	-0.479729	-0.348259
-0.459728	-0.204397	-0.459728	-0.235439	-0.459728	-0.257088	-0.459728	-0.265862	-0.459728	-0.270439	-0.459728	-0.276733	-0.459728	-0.281311	-0.459728	-0.285316	-0.459728	-0.288273	-0.459728	-0.296474	-0.459728	-0.223089	-0.459728	-0.265051	-0.459728	-0.291515	-0.459728	-0.304628	-0.459728	-0.311161	-0.459728	-0.316931	-0.459728	-0.321652	-0.459728	-0.326563	-0.459728	-0.331522	-0.459728	-0.338389	-0.459728	-0.175174	-0.459728	-0.230337	-0.459728	-0.256706	-0.459728	-0.268436	-0.459728	-0.274063
-0.439728	-0.151182	-0.439728	-0.173545	-0.439728	-0.188995	-0.439728	-0.196482	-0.439728	-0.200201	-0.439728	-0.205589	-0.439728	-0.210072	-0.439728	-0.214268	-0.439728	-0.217463	-0.439728	-0.224567	-0.439728	-0.166631	-0.439728	-0.196815	-0.439728	-0.216223	-0.439728	-0.226284	-0.439728	-0.232244	-0.439728	-0.237537	-0.439728	-0.241972	-0.439728	-0.246836	-0.439728	-0.25189	-0.439728	-0.258232	-0.439728	-0.130151	-0.439728	-0.169588	-0.439728	-0.188662	-0.439728	-0.197721	-0.439728	-0.20249
-0.419728	-0.104642	-0.419728	-0.117946	-0.419728	-0.127244	-0.419728	-0.132061	-0.419728	-0.135112	-0.419728	-0.138975	-0.419728	-0.142885	-0.419728	-0.146604	-0.419728	-0.149799	-0.419728	-0.15595	-0.419728	-0.117183	-0.419728	-0.135875	-0.419728	-0.14813	-0.419728	-0.15452	-0.419728	-0.158859	-0.419728	-0.163103	-0.419728	-0.167156	-0.419728	-0.171495	-0.419728	-0.17593	-0.419728	-0.181461	-0.419728	-0.0911168	-0.419728	-0.115896	-0.419728	-0.127483	-0.419728	-0.132967	-0.419728	-0.136638
-0.399728	-0.066257	-0.399728	-0.0708346	-0.399728	-0.073648	-0.399728	-0.0753646	-0.399728	-0.0764613	-0.399728	-0.0788455	-0.399728	-0.0812774	-0.399728	-0.0841384	-0.399728	-0.086904	-0.399728	-0.0915771	-0.399728	-0.0764613	-0.399728	-0.0840907	-0.399728	-0.0888114	-0.399728	-0.091291	-0.399728	-0.093246	-0.399728	-0.0957255	-0.399728	-0.0984912	-0.399728	-0.101877	-0.399728	-0.105501	-0.399728	-0.109935	-0.399728	-0.059407	-0.399728	-0.07093	-0.399728	-0.0748401	-0.399728	-0.0762706	-0.399728	-0.0778918
-0.379728	-0.0364542	-0.379728	-0.0329733	-0.379728	-0.029397	-0.379728	-0.0276327	-0.379728	-0.0262976	-0.379728	-0.0261545	-0.379728	-0.0268698	-0.379728	-0.0288248	-0.379728	-0.0304461	-0.379728	-0.0335455	-0.379728	-0.0448942	-0.379728	-0.0426054	-0.379728	-0.0401735	-0.379728	-0.0381231	-0.379728	-0.0371218	-0.379728	-0.0374556	-0.379728	-0.0382662	-0.379728	-0.0400782	-0.379728	-0.0426054	-0.379728	-0.0453711	-0.379728	-0.0351693	-0.379728	-0.0352144	-0.379728	-0.0318289	-0.379728	-0.0289202	-0.379728	-0.0277281
-0.359728	-0.0145364	-0.359728	-0.00397921	-0.359728	0.00531673	-0.359728	0.0109434	-0.359728	0.0148058	-0.359728	0.0175238	-0.359728	0.0185251	-0.359728	0.018239	-0.359728	0.0177145	-0.359728	0.0163794	-0.359728	-0.0215555	-0.359728	-0.010848	-0.359728	-0.00197887	-0.359728	0.00445843	-0.359728	0.00855923	-0.359728	0.0109911	-0.359728	0.0120878	-0.359728	0.0119925	-0.359728	0.0110388	-0.359728	0.009799	-0.359728	-0.0175643	-0.359728	-0.00836139	-0.359728	0.0015974	-0.359728	0.00879765	-0.359728	0.0129938
-0.339806	0.00089407	-0.339806	0.0169778	-0.339806	0.0309015	-0.339806	0.0397564	-0.339806	0.0462796	-0.339806	0.0510575	-0.339806	0.0537087	-0.339806	0.0550677	-0.339806	0.0558116	-0.339806	0.0560834	-0.339806	-0.00524282	-0.339806	0.012157	-0.339806	0.0262476	-0.339806	0.03639	-0.339806	0.043409	-0.339806	0.0481202	-0.339806	0.0512101	-0.339806	0.0528266	-0.339806	0.0533819	-0.339806	0.0537157	-0.339806	-0.00543356	-0.339806	0.0107027	-0.339806	0.0260139	-0.339806	0.0370289	-0.339806	0.0436665
-0.319806	0.0114847	-0.319806	0.0314404	-0.319806	0.0486352	-0.319806	0.0603559	-0.319806	0.0687339	-0.319806	0.0752094	-0.319806	0.0793913	-0.319806	0.0819424	-0.319806	0.083988	-0.319806	0.0856665	-0.319806	0.00604868	-0.319806	0.0282885	-0.319806	0.0461699	-0.319806	0.0591209	-0.319806	0.0683906	-0.319806	0.0749424	-0.319806	0.0795582	-0.319806	0.0826577	-0.319806	0.0844983	-0.319806	0.086234	-0.319806	0.00272036	-0.319806	0.0237204	-0.319806	0.0429799	-0.319806	0.0568368	-0.319806	0.0657442
-0.299806	0.0183559	-0.299806	0.040486	-0.299806	0.0597694	-0.299806	0.073283	-0.299806	0.0830105	-0.299806	0.0906065	-0.299806	0.0956992	-0.299806	0.0992946	-0.299806	0.102852	-0.299806	0.105021	-0.299806	0.0135971	-0.299806	0.0387885	-0.299806	0.0589731	-0.299806	0.0738504	-0.299806	0.0844553	-0.299806	0.0922898	-0.299806	0.0980309	-0.299806	0.102017	-0.299806	0.104931	-0.299806	0.107744	-0.299806	0.00801806	-0.299806	0.0318409	-0.299806	0.0535514	-0.299806	0.0693491	-0.299806	0.079768
-0.279806	0.022657	-0.279806	0.0454976	-0.279806	0.0656059	-0.279806	0.0804356	-0.279806	0.090783	-0.279806	0.0987557	-0.279806	0.104444	-0.279806	0.108679	-0.279806	0.11318	-0.279806	0.115855	-0.279806	0.0185276	-0.279806	0.0450208	-0.279806	0.0663021	-0.279806	0.081909	-0.279806	0.0932816	-0.279806	0.101779	-0.279806	0.108159	-0.279806	0.112765	-0.279806	0.116394	-0.279806	0.11978	-0.279806	0.0113702	-0.279806	0.0362851	-0.279806	0.0591352	-0.279806	0.075939	-0.279806	0.0871209
-0.259806	0.0249437	-0.259806	0.0471332	-0.259806	0.0669792	-0.259806	0.0821999	-0.259806	0.0927857	-0.259806	0.10072	-0.259806	0.106767	-0.259806	0.111216	-0.259806	0.116766	-0.259806	0.119451	-0.259806	0.0215829	-0.259806	0.0478961	-0.259806	0.0689343	-0.259806	0.0845078	-0.259806	0.095971	-0.259806	0.104592	-0.259806	0.111201	-0.259806	0.116156	-0.259806	0.120142	-0.259806	0.123957	-0.259806	0.0132397	-0.259806	0.0377823	-0.259806	0.0604942	-0.259806	0.0773409	-0.259806	0.0888423
-0.239805	0.0259684	-0.239805	0.0465991	-0.239805	0.0655439	-0.239805	0.0806263	-0.239805	0.090907	-0.239805	0.0987319	-0.239805	0.10453	-0.239805	0.109265	-0.239805	0.115893	-0.239805	0.117977	-0.239805	0.0233963	-0.239805	0.0484397	-0.239805	0.0684335	-0.239805	0.0833682	-0.239805	0.0944356	-0.239805	0.102866	-0.239805	0.10947	-0.239805	0.114344	-0.239805	0.118573	-0.239805	0.122517	-0.239805	0.0143297	-0.239805	0.0374152	-0.239805	0.0589683	-0.239805	0.0752619	-0.239805	0.0865105
-0.219806	0.025915	-0.219806	0.0444295	-0.219806	0.0618246	-0.219806	0.0763825	-0.219806	0.0861386	-0.219806	0.0934533	-0.219806	0.0984935	-0.219806	0.103619	-0.219806	0.110715	-0.219806	0.112513	-0.219806	0.0241245	-0.219806	0.0470807	-0.219806	0.0654294	-0.219806	0.0791195	-0.219806	0.0894574	-0.219806	0.0973348	-0.219806	0.103681	-0.219806	0.108417	-0.219806	0.112641	-0.219806	0.116661	-0.219806	0.0146983	-0.219806	0.0356843	-0.219806	0.0553729	-0.219806	0.070422	-0.219806	0.0809506
-0.199883	0.0251907	-0.199883	0.0414731	-0.199883	0.0570276	-0.199883	0.0707558	-0.199883	0.0798491	-0.199883	0.0866297	-0.199883	0.0911788	-0.199883	0.0960998	-0.199883	0.103238	-0.199883	0.104816	-0.199883	0.0241774	-0.199883	0.0446774	-0.199883	0.0610282	-0.199883	0.073283	-0.199883	0.0826672	-0.199883	0.0898198	-0.199883	0.0957231	-0.199883	0.100205	-0.199883	0.104273	-0.199883	0.108064	-0.199883	0.0146764	-0.199883	0.0332667	-0.199883	0.0507237	-0.199883	0.0641086	-0.199883	0.0737551
-0.179883	0.0240558	-0.179883	0.0380827	-0.179883	0.051892	-0.179883	0.0645092	-0.179883	0.0729254	-0.179883	0.0791052	-0.179883	0.0831011	-0.179883	0.0877455	-0.179883	0.0949363	-0.179883	0.0961141	-0.179883	0.0237492	-0.179883	0.0417067	-0.179883	0.0560309	-0.179883	0.0667694	-0.179883	0.0749615	-0.179883	0.081437	-0.179883	0.0868777	-0.179883	0.0910405	-0.179883	0.0948266	-0.179883	0.0984982	-0.179883	0.0144151	-0.179883	0.030644	-0.179883	0.0457599	-0.179883	0.0574234	-0.179883	0.0660112
-0.159883	0.0227097	-0.159883	0.034907	-0.159883	0.0468184	-0.159883	0.0570276	-0.159883	0.0661542	-0.159883	0.0717953	-0.159883	0.0750807	-0.159883	0.0795534	-0.159883	0.095332	-0.159883	0.0873545	-0.159883	0.0229529	-0.159883	0.0385024	-0.159883	0.0508763	-0.159883	0.0601556	-0.159883	0.0673416	-0.159883	0.0731257	-0.159883	0.0779226	-0.159883	0.0817278	-0.159883	0.0852994	-0.159883	0.0885943	-0.159883	0.0139921	-0.159883	0.0280691	-0.159883	0.0409533	-0.159883	0.0509955	-0.159883	0.0584724
-0.139883	0.0213626	-0.139883	0.0319745	-0.139883	0.0422694	-0.139883	0.0514342	-0.139883	0.0599172	-0.139883	0.064986	-0.139883	0.0678136	-0.139883	0.0718	-0.139883	0.0844458	-0.139883	0.0791815	-0.139883	0.0219873	-0.139883	0.0353648	-0.139883	0.0460984	-0.139883	0.0540807	-0.139883	0.0603607	-0.139883	0.0654008	-0.139883	0.0696924	-0.139883	0.0732019	-0.139883	0.0764635	-0.139883	0.0794342	-0.139883	0.0135544	-0.139883	0.0257421	-0.139883	0.0367524	-0.139883	0.0453116	-0.139883	0.0517156
-0.119884	0.020038	-0.119884	0.0295282	-0.119884	0.0384547	-0.119884	0.0466182	-0.119884	0.0542857	-0.119884	0.0590255	-0.119884	0.061753	-0.119884	0.0648429	-0.119884	0.0822428	-0.119884	0.0716856	-0.119884	0.0208877	-0.119884	0.032437	-0.119884	0.0417258	-0.119884	0.0486638	-0.119884	0.0540282	-0.119884	0.0584819	-0.119884	0.06233	-0.119884	0.0655105	-0.119884	0.0683477	-0.119884	0.0712231	-0.119884	0.0130852	-0.119884	0.0236774	-0.119884	0.0331379	-0.119884	0.0403382	-0.119884	0.0458743
-0.0998831	0.0188697	-0.0998831	0.0276638	-0.0998831	0.0353505	-0.0998831	0.0425602	-0.0998831	0.0497319	-0.0998831	0.0539758	-0.0998831	0.0560596	-0.0998831	0.0590541	-0.0998831	0.0734976	-0.0998831	0.0652244	-0.0998831	0.019831	-0.0998831	0.0298954	-0.0998831	0.0380684	-0.0998831	0.0440814	-0.0998831	0.0487639	-0.0998831	0.0527265	-0.0998831	0.056112	-0.0998831	0.0589921	-0.0998831	0.0616243	-0.0998831	0.0640562	-0.0998831	0.012707	-0.0998831	0.0220467	-0.0998831	0.0302292	-0.0998831	0.0364901	-0.0998831	0.0411917
-0.0798826	0.0179198	-0.0798826	0.0262953	-0.0798826	0.0330664	-0.0798826	0.0394084	-0.0798826	0.0475528	-0.0798826	0.0496985	-0.0798826	0.0515344	-0.0798826	0.0541856	-0.0798826	0.0694302	-0.0798826	0.0598218	-0.0798826	0.0188549	-0.0798826	0.0277878	-0.0798826	0.035093	-0.0798826	0.0403716	-0.0798826	0.0445153	-0.0798826	0.0480296	-0.0798826	0.0510957	-0.0798826	0.0536563	-0.0798826	0.0560071	-0.0798826	0.058296	-0.0798826	0.0123675	-0.0798826	0.0207354	-0.0798826	0.0280071	-0.0798826	0.0334527	-0.0798826	0.0375439
-0.0599613	0.0171579	-0.0599613	0.0253464	-0.0599613	0.0316931	-0.0599613	0.0386645	-0.0599613	0.0449349	-0.0599613	0.0463893	-0.0599613	0.0480391	-0.0599613	0.0501468	-0.0599613	0.0664213	-0.0599613	0.0553538	-0.0599613	0.018009	-0.0599613	0.0261236	-0.0599613	0.0326516	-0.0599613	0.0374867	-0.0599613	0.0412013	-0.0599613	0.044358	-0.0599613	0.0471379	-0.0599613	0.0495126	-0.0599613	0.0516488	-0.0599613	0.0537087	-0.0599613	0.0121019	-0.0599613	0.0198627	-0.0599613	0.0263954	-0.0599613	0.0312496	-0.0599613	0.0349309
-0.0399609	0.0165928	-0.0399609	0.0246264	-0.0399609	0.030172	-0.0399609	0.0365759	-0.0399609	0.0430466	-0.0399609	0.04411	-0.0399609	0.0454404	-0.0399609	0.0474336	-0.0399609	0.062783	-0.0399609	0.0537087	-0.0399609	0.0173262	-0.0399609	0.0248505	-0.0399609	0.0308968	-0.0399609	0.0352932	-0.0399609	0.0387551	-0.0399609	0.0416733	-0.0399609	0.0442578	-0.0399609	0.0463941	-0.0399609	0.0483634	-0.0399609	0.050347	-0.0399609	0.0119079	-0.0399609	0.0192286	-0.0399609	0.0253225	-0.0399609	0.0297667	-0.0399609	0.033095
-0.0199614	0.0161546	-0.0199614	0.0240303	-0.0199614	0.0286699	-0.0199614	0.0349881	-0.0199614	0.041721	-0.0199614	0.0427605	-0.0199614	0.0434853	-0.0199614	0.0452687	-0.0199614	0.0666406	-0.0199614	0.0542285	-0.0199614	0.0167182	-0.0199614	0.0239206	-0.0199614	0.0296141	-0.0199614	0.0336815	-0.0199614	0.0369097	-0.0199614	0.0396182	-0.0199614	0.0420071	-0.0199614	0.0440528	-0.0199614	0.0458838	-0.0199614	0.0477435	-0.0199614	0.0117443	-0.0199614	0.0188325	-0.0199614	0.0246168	-0.0199614	0.0288082	-0.0199614	0.0318839
3.91006e-05	0.0158027	3.91006e-05	0.023439	3.91006e-05	0.0278641	3.91006e-05	0.0328423	3.91006e-05	0.0401999	3.91006e-05	0.0416495	3.91006e-05	0.0426127	3.91006e-05	0.0439002	3.91006e-05	0.0683858	3.91006e-05	0.051234	3.91006e-05	0.0162452	3.91006e-05	0.0232054	3.91006e-05	0.0286509	3.91006e-05	0.032561	3.91006e-05	0.0356556	3.91006e-05	0.0381781	3.91006e-05	0.0404765	3.91006e-05	0.0423695	3.91006e-05	0.0440909	3.91006e-05	0.0459268	3.91006e-05	0.0115846	3.91006e-05	0.0185931	3.91006e-05	0.0242115	3.91006e-05	0.0281454	3.91006e-05	0.0311256
0.0200396	0.0164897	0.0200396	0.0230385	0.0200396	0.0273682	0.0200396	0.0334002	0.0200396	0.0394751	0.0200396	0.0395228	0.0200396	0.0409199	0.0200396	0.0435425	0.0200396	0.0684121	0.0200396	0.0488212	0.0200396	0.0158203	0.0200396	0.022719	0.0200396	0.0279165	0.0200396	0.0317313	0.0200396	0.0346543	0.0200396	0.0371768	0.0200396	0.0395323	0.0200396	0.0411583	0.0200396	0.0428559	0.0200396	0.0445964	0.0200396	0.0114153	0.0200396	0.018441	0.0200396	0.0238873	0.0200396	0.0278116	0.0200396	0.0307346
0.0400391	0.0170143	0.0400391	0.0234533	0.0400391	0.027001	0.0400391	0.0328518	0.0400391	0.0392367	0.0400391	0.0389935	0.0400391	0.0402857	0.0400391	0.041907	0.0400391	0.0696495	0.0400391	0.047796	0.0400391	0.015703	0.0400391	0.0225092	0.0400391	0.0275494	0.0400391	0.0311686	0.0400391	0.0340964	0.0400391	0.0365902	0.0400391	0.0387885	0.0400391	0.0405432	0.0400391	0.0425364	0.0400391	0.0439908	0.0400391	0.0114358	0.0400391	0.0183671	0.0400391	0.0237967	0.0400391	0.0276686	0.0400391	0.0305344
0.0600395	0.0169872	0.0600395	0.0240124	0.0600395	0.0269485	0.0600395	0.0340392	0.0600395	0.039313	0.0600395	0.0389124	0.0600395	0.03958	0.0600395	0.0412203	0.0600395	0.0689724	0.0600395	0.0472476	0.0600395	0.0155345	0.0600395	0.0224059	0.0600395	0.0273348	0.0600395	0.030892	0.0600395	0.0338437	0.0600395	0.0363375	0.0600395	0.0384928	0.0600395	0.0403573	0.0600395	0.0424696	0.0600395	0.0437572	0.0600395	0.0113948	0.0600395	0.0183614	0.0600395	0.0237967	0.0600395	0.0276924	0.0600395	0.0305964
0.0799608	0.0168536	0.0799608	0.0230382	0.0799608	0.0268723	0.0799608	0.0344445	0.0799608	0.0394799	0.0799608	0.0387825	0.0799608	0.0395681	0.0799608	0.0412013	0.0799608	0.0710943	0.0799608	0.0468137	0.0799608	0.0153912	0.0799608	0.022425	0.0799608	0.0272823	0.0799608	0.0307108	0.0799608	0.0337292	0.0799608	0.0362517	0.0799608	0.0383927	0.0799608	0.0403525	0.0799608	0.0419117	0.0799608	0.0437428	0.0799608	0.0112126	0.0799608	0.0183929	0.0799608	0.0238503	0.0799608	0.0277735	0.0799608	0.0307585
0.0999613	0.00149465	0.0999613	0.0228318	0.0999613	0.0266958	0.0999613	0.0344731	0.0999613	0.039766	0.0999613	0.038593	0.0999613	0.0391127	0.0999613	0.0410677	0.0999613	0.0782183	0.0999613	0.0464322	0.0999613	0.0152233	0.0999613	0.0223912	0.0999613	0.0272871	0.0999613	0.030582	0.0999613	0.0337006	0.0999613	0.0362612	0.0999613	0.0383736	0.0999613	0.0406052	0.0999613	0.0420071	0.0999613	0.0440766	0.0999613	0.0111473	0.0999613	0.0183743	0.0999613	0.0238718	0.0999613	0.0279165	0.0999613	0.0309349
0.119962	0.0212558	0.119962	0.0229238	0.119962	0.0266052	0.119962	0.034795	0.119962	0.0401474	0.119962	0.0386311	0.119962	0.0392939	0.119962	0.041777	0.119962	0.0792006	0.119962	0.0464084	0.119962	0.015354	0.119962	0.0221769	0.119962	0.0270666	0.119962	0.0306774	0.119962	0.0338389	0.119962	0.0364806	0.119962	0.0386883	0.119962	0.0410153	0.119962	0.0423171	0.119962	0.0447204	0.119962	0.0111807	0.119962	0.0184339	0.119962	0.0239714	0.119962	0.0280453	0.119962	0.0311781
0.139961	0.00823954	0.139961	0.0228246	0.139961	0.0267626	0.139961	0.0350691	0.139961	0.0405909	0.139961	0.038407	0.139961	0.0401379	0.139961	0.0425841	0.139961	0.0758102	0.139961	0.0465252	0.139961	0.0154098	0.139961	0.0218538	0.139961	0.0268055	0.139961	0.0307203	0.139961	0.0340821	0.139961	0.0368048	0.139961	0.0390317	0.139961	0.041516	0.139961	0.0428463	0.139961	0.0456883	0.139961	0.0112308	0.139961	0.0184711	0.139961	0.0240258	0.139961	0.0282265	0.139961	0.0314929
0.159962	0.00663354	0.159962	0.0227984	0.159962	0.0268532	0.159962	0.0351931	0.159962	0.0412919	0.159962	0.0384308	0.159962	0.0408055	0.159962	0.0422551	0.159962	0.0713375	0.159962	0.0465514	0.159962	0.0156148	0.159962	0.0220378	0.159962	0.0268913	0.159962	0.0308681	0.159962	0.0343396	0.159962	0.0372435	0.159962	0.0394274	0.159962	0.0420834	0.159962	0.0434233	0.159962	0.0462176	0.159962	0.0112865	0.159962	0.0184854	0.159962	0.0241264	0.159962	0.0284077	0.159962	0.0317885
0.179961	0.00728062	0.179961	0.0228079	0.179961	0.0269581	0.179961	0.0357892	0.179961	0.0418211	0.179961	0.0386549	0.179961	0.040424	0.179961	0.0422837	0.179961	0.0709465	0.179961	0.0467088	0.179961	0.015506	0.179961	0.0219592	0.179961	0.0268818	0.179961	0.0309731	0.179961	0.0346447	0.179961	0.037563	0.179961	0.0398327	0.179961	0.0421835	0.179961	0.0440051	0.179961	0.0459315	0.179961	0.0113876	0.179961	0.0185211	0.179961	0.0241431	0.179961	0.0284935	0.179961	0.0319792
0.199962	0.00816802	0.199962	0.0226878	0.199962	0.0269485	0.199962	0.0364949	0.199962	0.0423266	0.199962	0.0403143	0.199962	0.0412537	0.199962	0.0423838	0.199962	0.0680139	0.199962	0.0468089	0.199962	0.0154427	0.199962	0.0219434	0.199962	0.0269342	0.199962	0.0311018	0.199962	0.0349595	0.199962	0.0381781	0.199962	0.0401904	0.199962	0.0424649	0.199962	0.0444772	0.199962	0.0465323	0.199962	0.0114763	0.199962	0.0185431	0.199962	0.0241483	0.199962	0.0285173	0.199962	0.0321414
0.219884	0.00912455	0.219884	0.0226515	0.219884	0.0274635	0.219884	0.0375093	0.219884	0.042875	0.219884	0.039518	0.219884	0.0417639	0.219884	0.0429608	0.219884	0.0532653	0.219884	0.0470283	0.219884	0.0155566	0.219884	0.0220598	0.219884	0.0269772	0.219884	0.0311829	0.219884	0.0350739	0.219884	0.0386597	0.219884	0.04061	0.219884	0.0429799	0.219884	0.0450923	0.219884	0.0471332	0.219884	0.0115188	0.219884	0.0185517	0.219884	0.0241488	0.219884	0.0286461	0.219884	0.0323607
0.239883	0.0100892	0.239883	0.0226181	0.239883	0.0272966	0.239883	0.0388695	0.239883	0.043533	0.239883	0.0409247	0.239883	0.0417925	0.239883	0.0431038	0.239883	0.0463273	0.239883	0.0475718	0.239883	0.0158089	0.239883	0.0221222	0.239883	0.0270535	0.239883	0.0313403	0.239883	0.0352694	0.239883	0.0391938	0.239883	0.041001	0.239883	0.0434758	0.239883	0.0456979	0.239883	0.0478341	0.239883	0.0116671	0.239883	0.0186046	0.239883	0.0241693	0.239883	0.0287128	0.239883	0.0324704
0.259884	0.0111149	0.259884	0.0227145	0.259884	0.0273312	0.259884	0.0388838	0.259884	0.0441052	0.259884	0.039909	0.259884	0.0419439	0.259884	0.0434913	0.259884	0.0467422	0.259884	0.0475862	0.259884	0.0160974	0.259884	0.0222872	0.259884	0.027187	0.259884	0.0315405	0.259884	0.0356223	0.259884	0.0387455	0.259884	0.0414921	0.259884	0.043967	0.259884	0.0462796	0.259884	0.0485446	0.259884	0.0118778	0.259884	0.0187624	0.259884	0.0242547	0.259884	0.0288177	0.259884	0.0326993
0.279884	0.0120633	0.279884	0.0228756	0.279884	0.0273586	0.279884	0.0388791	0.279884	0.0447108	0.279884	0.0395276	0.279884	0.0420357	0.279884	0.0438334	0.279884	0.0471475	0.279884	0.0477626	0.279884	0.016424	0.279884	0.0225452	0.279884	0.0273062	0.279884	0.0316979	0.279884	0.0358655	0.279884	0.0389792	0.279884	0.0419165	0.279884	0.0444533	0.279884	0.0470187	0.279884	0.049174	0.279884	0.0121425	0.279884	0.0188874	0.279884	0.0243071	0.279884	0.0288797	0.279884	0.0328137
0.299884	0.0130942	0.299884	0.0229219	0.299884	0.027206	0.299884	0.0390984	0.299884	0.0454309	0.299884	0.0394942	0.299884	0.0421835	0.299884	0.0440671	0.299884	0.0475575	0.299884	0.0481393	0.299884	0.0168851	0.299884	0.0225795	0.299884	0.0275637	0.299884	0.0319363	0.299884	0.0360085	0.299884	0.0393321	0.299884	0.0422503	0.299884	0.0449826	0.299884	0.047424	0.299884	0.0498273	0.299884	0.0124939	0.299884	0.0190914	0.299884	0.0244606	0.299884	0.0290848	0.299884	0.0330283
0.319884	0.0141399	0.319884	0.0231732	0.319884	0.0274921	0.319884	0.0392653	0.319884	0.0460031	0.319884	0.0394274	0.319884	0.0427128	0.319884	0.0444676	0.319884	0.0477101	0.319884	0.0485112	0.319884	0.0174216	0.319884	0.0229309	0.319884	0.0278355	0.319884	0.032189	0.319884	0.0362803	0.319884	0.0396515	0.319884	0.042689	0.319884	0.0454022	0.319884	0.0479819	0.319884	0.0504424	0.319884	0.0128949	0.319884	0.0194019	0.319884	0.0247019	0.319884	0.0292707	0.319884	0.0332524
0.339884	0.015168	0.339884	0.0235542	0.339884	0.0276876	0.339884	0.0395609	0.339884	0.0468471	0.339884	0.0396658	0.339884	0.0425078	0.339884	0.0448157	0.339884	0.0479056	0.339884	0.0488259	0.339884	0.0180181	0.339884	0.0233405	0.339884	0.028236	0.339884	0.0326039	0.339884	0.036533	0.339884	0.0400187	0.339884	0.0431372	0.339884	0.0459506	0.339884	0.0484969	0.339884	0.051048	0.339884	0.0133923	0.339884	0.0197581	0.339884	0.0249666	0.339884	0.0295378	0.339884	0.0334765
0.359806	0.0162423	0.359806	0.0240162	0.359806	0.0279737	0.359806	0.0397946	0.359806	0.0477149	0.359806	0.0398041	0.359806	0.0429703	0.359806	0.0449922	0.359806	0.0479962	0.359806	0.0491693	0.359806	0.018689	0.359806	0.0237578	0.359806	0.0286413	0.359806	0.0329329	0.359806	0.036862	0.359806	0.0404336	0.359806	0.0434948	0.359806	0.0463893	0.359806	0.0489642	0.359806	0.0514628	0.359806	0.0139497	0.359806	0.0201753	0.359806	0.0253008	0.359806	0.0298573	0.359806	0.0337435
0.379807	0.0175565	0.379807	0.0246051	0.379807	0.0285269	0.379807	0.0404049	0.379807	0.0486495	0.379807	0.0401856	0.379807	0.0435473	0.379807	0.0457742	0.379807	0.0483586	0.379807	0.0496985	0.379807	0.0195158	0.379807	0.0243267	0.379807	0.0291515	0.379807	0.0334574	0.379807	0.0373723	0.379807	0.0409962	0.379807	0.0440051	0.379807	0.04689	0.379807	0.0494792	0.379807	0.0521161	0.379807	0.0146025	0.379807	0.0206884	0.379807	0.0257939	0.379807	0.0302483	0.379807	0.034125
0.399806	0.0187672	0.399806	0.0252841	0.399806	0.028813	0.399806	0.0408436	0.399806	0.0499703	0.399806	0.040486	0.399806	0.0436379	0.399806	0.0457026	0.399806	0.0489451	0.399806	0.050266	0.399806	0.0204905	0.399806	0.0249394	0.399806	0.0296761	0.399806	0.0339629	0.399806	0.0378396	0.399806	0.0414731	0.399806	0.0445058	0.399806	0.0473811	0.399806	0.0500371	0.399806	0.052674	0.399806	0.0153812	0.399806	0.0212615	0.399806	0.0262908	0.399806	0.0307108	0.399806	0.0345685
0.419806	0.0201257	0.419806	0.0260566	0.419806	0.0294853	0.419806	0.0411107	0.419806	0.0512149	0.419806	0.0410534	0.419806	0.0440719	0.419806	0.0462367	0.419806	0.0501897	0.419806	0.0509812	0.419806	0.021632	0.419806	0.0255903	0.419806	0.0302864	0.419806	0.0345828	0.419806	0.0383784	0.419806	0.0419165	0.419806	0.0450875	0.419806	0.0479581	0.419806	0.050657	0.419806	0.0532844	0.419806	0.016281	0.419806	0.0218452	0.419806	0.0269006	0.419806	0.0312735	0.419806	0.0350787
0.439806	0.0216988	0.439806	0.0269645	0.439806	0.0300289	0.439806	0.0408818	0.439806	0.0523402	0.439806	0.0417544	0.439806	0.0445773	0.439806	0.0471332	0.439806	0.0501611	0.439806	0.0513103	0.439806	0.0229906	0.439806	0.026338	0.439806	0.0309731	0.439806	0.0352885	0.439806	0.0391222	0.439806	0.0425936	0.439806	0.0458076	0.439806	0.0486447	0.439806	0.0513389	0.439806	0.0539996	0.439806	0.0173224	0.439806	0.0225218	0.439806	0.0275639	0.439806	0.0319649	0.439806	0.0357462
0.459806	0.0232895	0.459806	0.0279602	0.459806	0.0308252	0.459806	0.0456264	0.459806	0.0533845	0.459806	0.0424744	0.459806	0.0452926	0.459806	0.04761	0.459806	0.0507953	0.459806	0.0523879	0.459806	0.0245107	0.459806	0.02715	0.459806	0.0317742	0.459806	0.0360753	0.459806	0.0398804	0.459806	0.043409	0.459806	0.0465323	0.459806	0.0493934	0.459806	0.0521304	0.459806	0.0548102	0.459806	0.0185569	0.459806	0.0233053	0.459806	0.0283559	0.459806	0.0327517	0.459806	0.0365044
0.479807	0.0249775	0.479807	0.0290741	0.479807	0.0318553	0.479807	0.0472476	0.479807	0.0545337	0.479807	0.0436141	0.479807	0.0465562	0.479807	0.048578	0.479807	0.0516297	0.479807	0.0530221	0.479807	0.0262011	0.479807	0.0280784	0.479807	0.0326802	0.479807	0.0370146	0.479807	0.040815	0.479807	0.0443246	0.479807	0.0474813	0.479807	0.0504281	0.479807	0.0531795	0.479807	0.0558354	0.479807	0.0199669	0.479807	0.0241087	0.479807	0.0291899	0.479807	0.0336434	0.479807	0.0374199
0.499728	0.0268286	0.499728	0.030269	0.499728	0.0325848	0.499728	0.0487878	0.499728	0.0550344	0.499728	0.0442006	0.499728	0.0470044	0.499728	0.049565	0.499728	0.0524976	0.499728	0.0540139	0.499728	0.0280651	0.499728	0.0289758	0.499728	0.0335528	0.499728	0.0379397	0.499728	0.0418688	0.499728	0.0452973	0.499728	0.0484635	0.499728	0.0514533	0.499728	0.0542285	0.499728	0.0569179	0.499728	0.0215639	0.499728	0.0248941	0.499728	0.030012	0.499728	0.0345494	0.499728	0.0383927
0.519729	0.0288089	0.519729	0.0315765	0.519729	0.0346686	0.519729	0.0497748	0.519729	0.0565031	0.519729	0.0454452	0.519729	0.0483443	0.519729	0.0504329	0.519729	0.0536086	0.519729	0.0553586	0.519729	0.0299658	0.519729	0.0299276	0.519729	0.0345255	0.519729	0.0389554	0.519729	0.0429846	0.519729	0.0463941	0.519729	0.0496604	0.519729	0.0525882	0.519729	0.0554444	0.519729	0.0582626	0.519729	0.0233353	0.519729	0.0258544	0.519729	0.0308965	0.519729	0.0354458	0.519729	0.0394131
0.539729	0.0307444	0.539729	0.0328954	0.539729	0.0343873	0.539729	0.0512435	0.539729	0.0582769	0.539729	0.0466563	0.539729	0.0494744	0.539729	0.051501	0.539729	0.0544049	0.539729	0.0562599	0.539729	0.0318831	0.539729	0.0309094	0.539729	0.0355507	0.539729	0.0400044	0.539729	0.0441148	0.539729	0.0476148	0.539729	0.0508286	0.539729	0.0538995	0.539729	0.0567653	0.539729	0.0596311	0.539729	0.0250925	0.539729	0.0265754	0.539729	0.0317878	0.539729	0.0364949	0.539729	0.0404669
0.559729	0.0326532	0.559729	0.0343012	0.559729	0.0354411	0.559729	0.0524737	0.559729	0.0599506	0.559729	0.0480391	0.559729	0.0503566	0.559729	0.0527074	0.559729	0.0557067	0.559729	0.0577524	0.559729	0.033779	0.559729	0.0319504	0.559729	0.0365855	0.559729	0.041187	0.559729	0.0453212	0.559729	0.0488832	0.559729	0.0521876	0.559729	0.0553014	0.559729	0.0582387	0.559729	0.0611379	0.559729	0.0268468	0.559729	0.0274285	0.559729	0.0327262	0.559729	0.0375201	0.559729	0.0416304
0.579729	0.0344705	0.579729	0.0358008	0.579729	0.0364806	0.579729	0.0539472	0.579729	0.0613191	0.579729	0.0492599	0.579729	0.0516583	0.579729	0.0541331	0.579729	0.0572708	0.579729	0.0592353	0.579729	0.0356349	0.579729	0.0330213	0.579729	0.0377013	0.579729	0.0423886	0.579729	0.046642	0.579729	0.0502946	0.579729	0.0536229	0.579729	0.0568416	0.579729	0.0598218	0.579729	0.0629022	0.579729	0.0284031	0.579729	0.0283178	0.579729	0.0336651	0.579729	0.0385977	0.579729	0.0427796
0.599729	0.0363602	0.599729	0.0373057	0.599729	0.0377013	0.599729	0.0556685	0.599729	0.062969	0.599729	0.0506618	0.599729	0.052922	0.599729	0.0555732	0.599729	0.0589015	0.599729	0.0616672	0.599729	0.0373606	0.599729	0.0340423	0.599729	0.0388409	0.599729	0.0437094	0.599729	0.0478389	0.599729	0.0516965	0.599729	0.0552108	0.599729	0.0585058	0.599729	0.0615814	0.599729	0.0646904	0.599729	0.029941	0.599729	0.0292152	0.599729	0.0346021	0.599729	0.0396372	0.599729	0.0439479
0.619729	0.0379848	0.619729	0.0387978	0.619729	0.0387837	0.619729	0.0573089	0.619729	0.0649717	0.619729	0.0522496	0.619729	0.0541951	0.619729	0.0568702	0.619729	0.0601223	0.619729	0.0639274	0.619729	0.0390514	0.619729	0.0351895	0.619729	0.0399949	0.619729	0.0449206	0.619729	0.0492074	0.619729	0.0532319	0.619729	0.0567844	0.619729	0.0602891	0.619729	0.0634267	0.619729	0.0665786	0.619729	0.0315326	0.619729	0.0300978	0.619729	0.0355362	0.619729	0.040691	0.619729	0.0451161
0.639729	0.0396179	0.639729	0.0403952	0.639729	0.0398613	0.639729	0.059078	0.639729	0.0669935	0.639729	0.0535848	0.639729	0.0558402	0.639729	0.0584581	0.639729	0.0621393	0.639729	0.064862	0.639729	0.040759	0.639729	0.0363983	0.639729	0.0411965	0.639729	0.0462796	0.639729	0.0506904	0.639729	0.0548055	0.639729	0.0585821	0.639729	0.0621345	0.639729	0.0653961	0.639729	0.0687387	0.639729	0.0333227	0.639729	0.0310348	0.639729	0.0364756	0.639729	0.0417592	0.639729	0.0463511
0.659651	0.0412878	0.659651	0.0420427	0.659651	0.0412299	0.659651	0.0611522	0.659651	0.0691155	0.659651	0.0552155	0.659651	0.0577857	0.659651	0.0602081	0.659651	0.063503	0.659651	0.0667121	0.659651	0.0426187	0.659651	0.0375256	0.659651	0.0424983	0.659651	0.0477912	0.659651	0.0523021	0.659651	0.0565889	0.659651	0.060499	0.659651	0.0641801	0.659651	0.0676372	0.659651	0.0711754	0.659651	0.0355858	0.659651	0.0320815	0.659651	0.0374655	0.659651	0.0429083	0.659651	0.0476577
0.679651	0.0429606	0.679651	0.0439128	0.679651	0.0424553	0.679651	0.0634792	0.679651	0.0713471	0.679651	0.0572994	0.679651	0.0594642	0.679651	0.0622108	0.679651	0.0655773	0.679651	0.0694874	0.679651	0.0449523	0.679651	0.0390209	0.679651	0.0440385	0.679651	0.0494983	0.679651	0.054238	0.679651	0.0586774	0.679651	0.0627592	0.679651	0.0665929	0.679651	0.0702408	0.679651	0.0739935	0.679651	0.0386065	0.679651	0.0333256	0.679651	0.038794	0.679651	0.0442197	0.679651	0.0490643
0.699651	0.0448298	0.699651	0.0459079	0.699651	0.0441625	0.699651	0.0669172	0.699651	0.0738123	0.699651	0.0594833	0.699651	0.0612953	0.699651	0.0643804	0.699651	0.0678232	0.699651	0.0723436	0.699651	0.047902	0.699651	0.0408343	0.699651	0.0459506	0.699651	0.0514867	0.699651	0.0564697	0.699651	0.0610569	0.699651	0.0652959	0.699651	0.0693539	0.699651	0.0731733	0.699651	0.0772217	0.699651	0.0430578	0.699651	0.0350131	0.699651	0.0401577	0.699651	0.045717	0.699651	0.0508048
0.719651	0.0469498	0.719651	0.048273	0.719651	0.0460078	0.719651	0.0795868	0.719651	0.0762585	0.719651	0.0622537	0.719651	0.0637891	0.719651	0.0668457	0.719651	0.0703695	0.719651	0.0755623	0.719651	0.0515561	0.719651	0.0430144	0.719651	0.0481774	0.719651	0.0540235	0.719651	0.0590398	0.719651	0.0637987	0.719651	0.0681379	0.719651	0.0724533	0.719651	0.076597	0.719651	0.0807264	0.719651	0.0493946	0.719651	0.0371865	0.719651	0.0419702	0.719651	0.0475575	0.719651	0.052798
0.739652	0.0491919	0.739652	0.0512371	0.739652	0.0479342	0.739652	0.0808266	0.739652	0.0790813	0.739652	0.0652149	0.739652	0.0671985	0.739652	0.0696304	0.739652	0.073221	0.739652	0.0797585	0.739652	0.0562789	0.739652	0.0457987	0.739652	0.0510623	0.739652	0.0570276	0.739652	0.0621727	0.739652	0.0671461	0.739652	0.071719	0.739652	0.0761393	0.739652	0.0806644	0.739652	0.0851611	0.739652	0.057847	0.739652	0.0402383	0.739652	0.0444516	0.739652	0.0500323	0.739652	0.0553109
0.759651	0.0517716	0.759651	0.0541236	0.759651	0.0502374	0.759651	0.0828961	0.759651	0.079911	0.759651	0.0684717	0.759651	0.069969	0.759651	0.0728968	0.759651	0.0761917	0.759651	0.0842217	0.759651	0.0613763	0.759651	0.0490603	0.759651	0.0542953	0.759651	0.0604846	0.759651	0.0658252	0.759651	0.0709179	0.759651	0.075629	0.759651	0.0803402	0.759651	0.0850276	0.759651	0.0899962	0.759651	0.0673892	0.759651	0.0440726	0.759651	0.0476174	0.759651	0.0529649	0.759651	0.058315
0.779652	0.0545003	0.779652	0.0574758	0.779652	0.052922	0.779652	0.0826911	0.779652	0.083001	0.779652	0.0726822	0.779652	0.0730207	0.779652	0.0757816	0.779652	0.0795296	0.779652	0.0887373	0.779652	0.0662639	0.779652	0.0524654	0.779652	0.0577285	0.779652	0.0642183	0.779652	0.0697735	0.779652	0.0749805	0.779652	0.0799969	0.779652	0.084937	0.779652	0.0898961	0.779652	0.0953464	0.779652	0.0766018	0.779652	0.0486602	0.779652	0.0513134	0.779652	0.056546	0.779652	0.0619056
0.799573	0.0573375	0.799573	0.0612047	0.799573	0.0572135	0.799573	0.0846842	0.799573	0.0857857	0.799573	0.0753477	0.799573	0.0755194	0.799573	0.0785711	0.799573	0.0825146	0.799573	0.0927571	0.799573	0.0701788	0.799573	0.0556447	0.799573	0.0610712	0.799573	0.0679281	0.799573	0.0735262	0.799573	0.0789669	0.799573	0.0841502	0.799573	0.0893286	0.799573	0.094736	0.799573	0.100506	0.799573	0.084112	0.799573	0.0532798	0.799573	0.0552537	0.799573	0.0602558	0.799573	0.0655868
0.819573	0.0605323	0.819573	0.0643756	0.819573	0.0586917	0.819573	0.0881079	0.819573	0.0852994	0.819573	0.07808	0.819573	0.0783327	0.819573	0.0815085	0.819573	0.0852994	0.819573	0.0964908	0.819573	0.0730732	0.819573	0.058439	0.819573	0.0639942	0.819573	0.0710991	0.819573	0.0770309	0.819573	0.0826243	0.819573	0.0880698	0.819573	0.093644	0.819573	0.099347	0.819573	0.105546	0.819573	0.089629	0.819573	0.0576999	0.819573	0.0590065	0.819573	0.0638511	0.819573	0.0692633
0.839574	0.0667074	0.839574	0.0675132	0.839574	0.0639	0.839574	0.0917939	0.839574	0.0863532	0.839574	0.0803879	0.839574	0.0811556	0.839574	0.084031	0.839574	0.0883225	0.839574	0.100496	0.839574	0.0753096	0.839574	0.0608184	0.839574	0.0665929	0.839574	0.0742462	0.839574	0.0802305	0.839574	0.0860671	0.839574	0.0917605	0.839574	0.0976638	0.839574	0.103839	0.839574	0.11041	0.839574	0.093315	0.839574	0.061672	0.839574	0.0625017	0.839574	0.0672843	0.839574	0.072687
0.859573	0.0706127	0.859573	0.0710037	0.859573	0.0715616	0.859573	0.0924519	0.859573	0.0881222	0.859573	0.082877	0.859573	0.0839022	0.859573	0.0870493	0.859573	0.0913504	0.859573	0.103624	0.859573	0.0771645	0.859573	0.0630262	0.859573	0.0690344	0.859573	0.0770834	0.859573	0.0832919	0.859573	0.0896004	0.859573	0.0953797	0.859573	0.101636	0.859573	0.108159	0.859573	0.115202	0.859573	0.0961761	0.859573	0.06511	0.859573	0.0658157	0.859573	0.0705126	0.859573	0.0760582
0.879574	0.0752142	0.879574	0.074766	0.879574	0.0681331	0.879574	0.0960521	0.879574	0.0908497	0.879574	0.085285	0.879574	0.08611	0.879574	0.0897244	0.879574	0.0944928	0.879574	0.107196	0.879574	0.0789717	0.879574	0.0651481	0.879574	0.0713709	0.879574	0.0794056	0.879574	0.0862196	0.879574	0.0925616	0.879574	0.098894	0.879574	0.105393	0.879574	0.11225	0.879574	0.11987	0.879574	0.0984029	0.879574	0.0682905	0.879574	0.0687912	0.879574	0.0734261	0.879574	0.0789955
0.899573	0.0818709	0.899573	0.07911	0.899573	0.0814942	0.899573	0.0999907	0.899573	0.0957421	0.899573	0.0885132	0.899573	0.0888661	0.899573	0.092986	0.899573	0.097969	0.899573	0.111316	0.899573	0.0809696	0.899573	0.0674274	0.899573	0.0738504	0.899573	0.0822762	0.899573	0.0892428	0.899573	0.0958899	0.899573	0.102637	0.899573	0.109475	0.899573	0.116799	0.899573	0.124743	0.899573	0.100601	0.899573	0.0715712	0.899573	0.0717571	0.899573	0.0763634	0.899573	0.082033
0.919574	0.090783	0.919574	0.0838164	0.919574	0.0870064	0.919574	0.104816	0.919574	0.10371	0.919574	0.0916461	0.919574	0.0922135	0.919574	0.0962094	0.919574	0.10155	0.919574	0.115655	0.919574	0.0832108	0.919574	0.0697258	0.919574	0.0763968	0.919574	0.0851706	0.919574	0.0922802	0.919574	0.099285	0.919574	0.106271	0.919574	0.113414	0.919574	0.121224	0.919574	0.129488	0.919574	0.103929	0.919574	0.0744417	0.919574	0.0746468	0.919574	0.079191	0.919574	0.0848988
0.939496	0.100458	0.939496	0.0890711	0.939496	0.0910834	0.939496	0.104087	0.939496	0.106404	0.939496	0.0952701	0.939496	0.0954799	0.939496	0.0999526	0.939496	0.105412	0.939496	0.120132	0.939496	0.0855092	0.939496	0.0722149	0.939496	0.0790623	0.939496	0.0882987	0.939496	0.0955085	0.939496	0.102704	0.939496	0.110009	0.939496	0.11761	0.939496	0.125778	0.939496	0.134461	0.939496	0.106223	0.939496	0.077441	0.939496	0.0773886	0.939496	0.0820521	0.939496	0.087879
0.959496	0.113275	0.959496	0.0945548	0.959496	0.0970153	0.959496	0.108445	0.959496	0.110362	0.959496	0.0985221	0.959496	0.099018	0.959496	0.105908	0.959496	0.109761	0.959496	0.125077	0.959496	0.088065	0.959496	0.0749186	0.959496	0.0820235	0.959496	0.0913266	0.959496	0.0988416	0.959496	0.106323	0.959496	0.113934	0.959496	0.121921	0.959496	0.130451	0.959496	0.139587	0.959496	0.10917	0.959496	0.0805071	0.959496	0.080345	0.959496	0.0849274	0.959496	0.0910309
0.979496	0.128267	0.979496	0.100224	0.979496	0.10309	0.979496	0.111592	0.979496	0.114453	0.979496	0.101893	0.979496	0.103238	0.979496	0.109728	0.979496	0.113595	0.979496	0.129803	0.979496	0.0906828	0.979496	0.0776318	0.979496	0.084832	0.979496	0.0944165	0.979496	0.102218	0.979496	0.109985	0.979496	0.117872	0.979496	0.12626	0.979496	0.135096	0.979496	0.144737	0.979496	0.112012	0.979496	0.0835637	0.979496	0.0832299	0.979496	0.0879315	0.979496	0.0940303
0.999496	0.144299	0.999496	0.106256	0.999496	0.109709	0.999496	0.12387	0.999496	0.118654	0.999496	0.105856	0.999496	0.106924	0.999496	0.11328	0.999496	0.117605	0.999496	0.135067	0.999496	0.0933865	0.999496	0.0805929	0.999496	0.0880698	0.999496	0.0977019	0.999496	0.105884	0.999496	0.114162	0.999496	0.122269	0.999496	0.130895	0.999496	0.140389	0.999496	0.150369	0.999496	0.114329	0.999496	0.0865201	0.999496	0.0863675	0.999496	0.0911454	0.999496	0.0973062
1.0195	0.159624	1.0195	0.112727	1.0195	0.120447	1.0195	0.133541	1.0195	0.122517	1.0195	0.109795	1.0195	0.110724	1.0195	0.117	1.0195	0.122369	1.0195	0.141051	1.0195	0.0962714	1.0195	0.0836972	1.0195	0.0913361	1.0195	0.101149	1.0195	0.109828	1.0195	0.118125	1.0195	0.126889	1.0195	0.135897	1.0195	0.145763	1.0195	0.156363	1.0195	0.116899	1.0195	0.0896624	1.0195	0.0896958	1.0195	0.0945024	1.0195	0.100778
1.0395	0.173782	1.0395	0.119699	1.0395	0.121234	1.0395	0.1419	1.0395	0.125897	1.0395	0.114372	1.0395	0.114825	1.0395	0.121773	1.0395	0.127562	1.0395	0.147403	1.0395	0.0995282	1.0395	0.0872544	1.0395	0.0950459	1.0395	0.105212	1.0395	0.114277	1.0395	0.122779	1.0395	0.131877	1.0395	0.141333	1.0395	0.151599	1.0395	0.162671	1.0395	0.117271	1.0395	0.093067	1.0395	0.0932816	1.0395	0.0982694	1.0395	0.104831
1.0595	0.135282	1.0595	0.127604	1.0595	0.118907	1.0595	0.162385	1.0595	0.126188	1.0595	0.119436	1.0595	0.120824	1.0595	0.12781	1.0595	0.13655	1.0595	0.154493	1.0595	0.103405	1.0595	0.0914267	1.0595	0.099657	1.0595	0.110014	1.0595	0.11937	1.0595	0.12831	1.0595	0.137837	1.0595	0.147813	1.0595	0.15857	1.0595	0.170124	1.0595	0.120705	1.0595	0.0967626	1.0595	0.0973395	1.0595	0.102604	1.0595	0.10927
1.07942	0.102475	1.07942	0.136908	1.07942	0.118344	1.07942	0.176185	1.07942	0.130103	1.07942	0.125545	1.07942	0.127175	1.07942	0.13366	1.07942	0.143316	1.07942	0.162757	1.07942	0.107954	1.07942	0.0963763	1.07942	0.105093	1.07942	0.115521	1.07942	0.125373	1.07942	0.134757	1.07942	0.144823	1.07942	0.155199	1.07942	0.166619	1.07942	0.17876	1.07942	0.124658	1.07942	0.101183	1.07942	0.101951	1.07942	0.107501	1.07942	0.11453
1.09942	0.128501	1.09942	0.148213	1.09942	0.113447	1.09942	0.178574	1.09942	0.13831	1.09942	0.132497	1.09942	0.134152	1.09942	0.142859	1.09942	0.151899	1.09942	0.17227	1.09942	0.11379	1.09942	0.102117	1.09942	0.111115	1.09942	0.122393	1.09942	0.132626	1.09942	0.142568	1.09942	0.153411	1.09942	0.164307	1.09942	0.176442	1.09942	0.189379	1.09942	0.129712	1.09942	0.106295	1.09942	0.107534	1.09942	0.113328	1.09942	0.120681
1.11942	0.142692	1.11942	0.161479	1.11942	0.124228	1.11942	0.193361	1.11942	0.146211	1.11942	0.140732	1.11942	0.143145	1.11942	0.152133	1.11942	0.16239	1.11942	0.183399	1.11942	0.120557	1.11942	0.10897	1.11942	0.118578	1.11942	0.13017	1.11942	0.141147	1.11942	0.151504	1.11942	0.163096	1.11942	0.174845	1.11942	0.187691	1.11942	0.201696	1.11942	0.135773	1.11942	0.112446	1.11942	0.113757	1.11942	0.120032	1.11942	0.127924
1.13942	0.119074	1.13942	0.177458	1.13942	0.131233	1.13942	0.210031	1.13942	0.157188	1.13942	0.150965	1.13942	0.153988	1.13942	0.164898	1.13942	0.175603	1.13942	0.198057	1.13942	0.129488	1.13942	0.117701	1.13942	0.127862	1.13942	0.139993	1.13942	0.151332	1.13942	0.162542	1.13942	0.174897	1.13942	0.187619	1.13942	0.201538	1.13942	0.216387	1.13942	0.14345	1.13942	0.119751	1.13942	0.121396	1.13942	0.128205	1.13942	0.136579
1.15942	0.134647	1.15942	0.178078	1.15942	0.141895	1.15942	0.227345	1.15942	0.162643	1.15942	0.163835	1.15942	0.168565	1.15942	0.179308	1.15942	0.192259	1.15942	0.216483	1.15942	0.141175	1.15942	0.128654	1.15942	0.139149	1.15942	0.151923	1.15942	0.164045	1.15942	0.176047	1.15942	0.189265	1.15942	0.203079	1.15942	0.21818	1.15942	0.234297	1.15942	0.153134	1.15942	0.128568	1.15942	0.130661	1.15942	0.13778	1.15942	0.146773
1.17942	0.16568	1.17942	0.146788	1.17942	0.151651	1.17942	0.246628	1.17942	0.178555	1.17942	0.180114	1.17942	0.187653	1.17942	0.198887	1.17942	0.213364	1.17942	0.238241	1.17942	0.156744	1.17942	0.142949	1.17942	0.15343	1.17942	0.166863	1.17942	0.179756	1.17942	0.192645	1.17942	0.207098	1.17942	0.221923	1.17942	0.238403	1.17942	0.256127	1.17942	0.166047	1.17942	0.140017	1.17942	0.141614	1.17942	0.149687	1.17942	0.159453
1.19942	0.179647	1.19942	0.157097	1.19942	0.172795	1.19942	0.266012	1.19942	0.205243	1.19942	0.200508	1.19942	0.208653	1.19942	0.223368	1.19942	0.239147	1.19942	0.266384	1.19942	0.177301	1.19942	0.161093	1.19942	0.171631	1.19942	0.185397	1.19942	0.199331	1.19942	0.213173	1.19942	0.228818	1.19942	0.245002	1.19942	0.263218	1.19942	0.282529	1.19942	0.182069	1.19942	0.153926	1.19942	0.155728	1.19942	0.164121	1.19942	0.174769
1.21934	0.210937	1.21934	0.181397	1.21934	0.190695	1.21934	0.290974	1.21934	0.216211	1.21934	0.225805	1.21934	0.235938	1.21934	0.251778	1.21934	0.271348	1.21934	0.300444	1.21934	0.203851	1.21934	0.184515	1.21934	0.194448	1.21934	0.208653	1.21934	0.223154	1.21934	0.238627	1.21934	0.255321	1.21934	0.273164	1.21934	0.294279	1.21934	0.314597	1.21934	0.203498	1.21934	0.171459	1.21934	0.172871	1.21934	0.18175	1.21934	0.193466
1.23934	0.22488	1.23934	0.205916	1.23934	0.216511	1.23934	0.335263	1.23934	0.242289	1.23934	0.256103	1.23934	0.269073	1.23934	0.286268	1.23934	0.309786	1.23934	0.343417	1.23934	0.237101	1.23934	0.213459	1.23934	0.222381	1.23934	0.236896	1.23934	0.252169	1.23934	0.268229	1.23934	0.286969	1.23934	0.306648	1.23934	0.329045	1.23934	0.352773	1.23934	0.229758	1.23934	0.193408	1.23934	0.193666	1.23934	0.20305	1.23934	0.215944
1.25934	0.2644	1.25934	0.246209	1.25934	0.245417	1.25934	0.383314	1.25934	0.275935	1.25934	0.292405	1.25934	0.309156	1.25934	0.338711	1.25934	0.355228	1.25934	0.388531	1.25934	0.278362	1.25934	0.249432	1.25934	0.256947	1.25934	0.271314	1.25934	0.287355	1.25934	0.304579	1.25934	0.325407	1.25934	0.346822	1.25934	0.371884	1.25934	0.397996	1.25934	0.262908	1.25934	0.220202	1.25934	0.219391	1.25934	0.229233	1.25934	0.243124
1.27934	0.311741	1.27934	0.288681	1.27934	0.285753	1.27934	0.423555	1.27934	0.31906	1.27934	0.336965	1.27934	0.356196	1.27934	0.388984	1.27934	0.410341	1.27934	0.44403	1.27934	0.328144	1.27934	0.293859	1.27934	0.300144	1.27934	0.313014	1.27934	0.32976	1.27934	0.348157	1.27934	0.371608	1.27934	0.395445	1.27934	0.422553	1.27934	0.451774	1.27934	0.303	1.27934	0.253352	1.27934	0.251072	1.27934	0.260981	1.27934	0.275949
1.29934	0.348834	1.29934	0.328993	1.29934	0.333275	1.29934	0.476946	1.29934	0.368804	1.29934	0.391254	1.29934	0.414647	1.29934	0.450377	1.29934	0.47718	1.29934	0.508537	1.29934	0.388574	1.29934	0.348257	1.29934	0.352291	1.29934	0.364193	1.29934	0.381664	1.29934	0.401639	1.29934	0.42787	1.29934	0.453548	1.29934	0.484166	1.29934	0.516877	1.29934	0.352138	1.29934	0.294212	1.29934	0.289606	1.29934	0.300249	1.29934	0.316228
1.27934	0.27696	1.27934	0.26575	1.27934	0.257796	1.27934	0.391521	1.27934	0.284012	1.27934	0.296887	1.27934	0.313171	1.27934	0.33997	1.27934	0.357846	1.27934	0.386359	1.27934	0.291008	1.27934	0.265058	1.27934	0.27037	1.27934	0.280355	1.27934	0.292639	1.27934	0.306576	1.27934	0.325154	1.27934	0.343179	1.27934	0.365347	1.27934	0.389649	1.27934	0.269307	1.27934	0.227354	1.27934	0.224331	1.27934	0.231565	1.27934	0.243238
1.25934	0.258521	1.25934	0.218647	1.25934	0.202945	1.25934	0.321254	1.25934	0.230716	1.25934	0.232271	1.25934	0.243743	1.25934	0.264562	1.25934	0.276497	1.25934	0.302292	1.25934	0.224489	1.25934	0.207108	1.25934	0.213021	1.25934	0.221833	1.25934	0.230978	1.25934	0.241192	1.25934	0.254935	1.25934	0.268396	1.25934	0.284704	1.25934	0.303007	1.25934	0.212262	1.25934	0.180667	1.25934	0.178436	1.25934	0.18401	1.25934	0.192526
1.23934	0.195797	1.23934	0.183809	1.23934	0.166143	1.23934	0.218895	1.23934	0.193947	1.23934	0.18462	1.23934	0.193013	1.23934	0.207909	1.23934	0.217131	1.23934	0.24016	1.23934	0.176461	1.23934	0.164507	1.23934	0.170215	1.23934	0.178049	1.23934	0.185264	1.23934	0.192984	1.23934	0.203484	1.23934	0.213765	1.23934	0.22632	1.23934	0.240494	1.23934	0.170739	1.23934	0.146282	1.23934	0.144613	1.23934	0.148781	1.23934	0.155361
1.21934	0.173114	1.21934	0.143312	1.21934	0.140503	1.21934	0.178941	1.21934	0.15333	1.21934	0.148495	1.21934	0.154174	1.21934	0.165318	1.21934	0.172713	1.21934	0.193954	1.21934	0.140799	1.21934	0.132239	1.21934	0.137737	1.21934	0.144461	1.21934	0.150521	1.21934	0.156396	1.21934	0.164574	1.21934	0.172618	1.21934	0.182498	1.21934	0.193859	1.21934	0.139568	1.21934	0.12007	1.21934	0.118936	1.21934	0.122188	1.21934	0.127256
1.19942	0.148485	1.19942	0.122078	1.19942	0.120538	1.19942	0.153959	1.19942	0.124267	1.19942	0.120328	1.19942	0.12451	1.19942	0.131138	1.19942	0.138739	1.19942	0.157714	1.19942	0.113523	1.19942	0.107353	1.19942	0.112393	1.19942	0.118154	1.19942	0.123265	1.19942	0.128067	1.19942	0.134414	1.19942	0.14087	1.19942	0.148905	1.19942	0.157953	1.19942	0.116275	1.19942	0.0997476	1.19942	0.0989608	1.19942	0.101531	1.19942	0.105513
1.17942	0.126336	1.17942	0.103834	1.17942	0.0992087	1.17942	0.12595	1.17942	0.10216	1.17942	0.098379	1.17942	0.101259	1.17942	0.107182	1.17942	0.111697	1.17942	0.129581	1.17942	0.0925187	1.17942	0.0878361	1.17942	0.0924042	1.17942	0.097597	1.17942	0.101846	1.17942	0.105832	1.17942	0.110858	1.17942	0.116103	1.17942	0.122617	1.17942	0.130249	1.17942	0.0974111	1.17942	0.0838593	1.17942	0.0832203	1.17942	0.0853566	1.17942	0.0884942
1.15942	0.111402	1.15942	0.0988034	1.15942	0.0816229	1.15942	0.108531	1.15942	0.0909022	1.15942	0.0811699	1.15942	0.0830821	1.15942	0.087283	1.15942	0.0910262	1.15942	0.10779	1.15942	0.0763205	1.15942	0.072625	1.15942	0.0766638	1.15942	0.0812367	1.15942	0.0847939	1.15942	0.0881175	1.15942	0.0923089	1.15942	0.0966624	1.15942	0.102032	1.15942	0.108219	1.15942	0.0824717	1.15942	0.0712708	1.15942	0.0707224	1.15942	0.0723532	1.15942	0.0749376
1.13942	0.108254	1.13942	0.085924	1.13942	0.069125	1.13942	0.0936583	1.13942	0.081208	1.13942	0.0676515	1.13942	0.0688913	1.13942	0.0720671	1.13942	0.0745228	1.13942	0.0904301	1.13942	0.063832	1.13942	0.060704	1.13942	0.0644567	1.13942	0.0682952	1.13942	0.0713423	1.13942	0.0741079	1.13942	0.077565	1.13942	0.0812367	1.13942	0.0855855	1.13942	0.0908021	1.13942	0.0709084	1.13942	0.0612381	1.13942	0.0606897	1.13942	0.0621154	1.13942	0.0640991
1.11942	0.0973872	1.11942	0.074251	1.11942	0.0639989	1.11942	0.082672	1.11942	0.0714663	1.11942	0.0572231	1.11942	0.057657	1.11942	0.0597599	1.11942	0.0621059	1.11942	0.0769356	1.11942	0.0542619	1.11942	0.0514628	1.11942	0.0547482	1.11942	0.0580766	1.11942	0.0606372	1.11942	0.0628736	1.11942	0.0657728	1.11942	0.0688389	1.11942	0.0724915	1.11942	0.0769451	1.11942	0.0618484	1.11942	0.0531079	1.11942	0.0525739	1.11942	0.0536468	1.11942	0.0553491
1.09942	0.0884846	1.09942	0.0660923	1.09942	0.0495698	1.09942	0.0733259	1.09942	0.0648906	1.09942	0.0487639	1.09942	0.0491025	1.09942	0.0500609	1.09942	0.0521447	1.09942	0.0659063	1.09942	0.0467898	1.09942	0.0442435	1.09942	0.0471093	1.09942	0.0499513	1.09942	0.0520684	1.09942	0.0539662	1.09942	0.0563123	1.09942	0.0589206	1.09942	0.0619581	1.09942	0.0656869	1.09942	0.0543143	1.09942	0.0464942	1.09942	0.0458934	1.09942	0.0467565	1.09942	0.0482156
1.07942	0.0774553	1.07942	0.0582197	1.07942	0.0439956	1.07942	0.0689152	1.07942	0.056298	1.07942	0.041907	1.07942	0.0415827	1.07942	0.0422551	1.07942	0.0439908	1.07942	0.0568845	1.07942	0.040877	1.07942	0.0384785	1.07942	0.0409628	1.07942	0.0433756	1.07942	0.0451447	1.07942	0.0465896	1.07942	0.0485255	1.07942	0.0507047	1.07942	0.0532224	1.07942	0.0564411	1.07942	0.0481679	1.07942	0.0409771	1.07942	0.040343	1.07942	0.0409867	1.07942	0.0421311
1.0595	0.0685098	1.0595	0.0551249	1.0595	0.0377919	1.0595	0.0662925	1.0595	0.0404669	1.0595	0.0363995	1.0595	0.0358035	1.0595	0.0362135	1.0595	0.0375153	1.0595	0.049956	1.0595	0.0361659	1.0595	0.0338818	1.0595	0.0359179	1.0595	0.0380017	1.0595	0.0394179	1.0595	0.0405337	1.0595	0.0421406	1.0595	0.043924	1.0595	0.0460507	1.0595	0.0488259	1.0595	0.0429799	1.0595	0.0363852	1.0595	0.0357033	1.0595	0.0361563	1.0595	0.0371291
1.0395	0.0624826	1.0395	0.0462462	1.0395	0.0331236	1.0395	0.0639036	1.0395	0.0358368	1.0395	0.0316884	1.0395	0.0318982	1.0395	0.0310255	1.0395	0.0320937	1.0395	0.0444104	1.0395	0.0322367	1.0395	0.0300003	1.0395	0.0316931	1.0395	0.0334431	1.0395	0.0346018	1.0395	0.0354315	1.0395	0.0367142	1.0395	0.0382115	1.0395	0.0399615	1.0395	0.042298	1.0395	0.0385739	1.0395	0.032437	1.0395	0.0316884	1.0395	0.0320174	1.0395	0.032766
1.0195	0.0563934	1.0195	0.0464036	1.0195	0.0293661	1.0195	0.0600984	1.0195	0.0259138	1.0195	0.0278402	1.0195	0.0283123	1.0195	0.0266005	1.0195	0.0274015	1.0195	0.0380017	1.0195	0.0288034	1.0195	0.0266529	1.0195	0.0281025	1.0195	0.0295044	1.0195	0.0304342	1.0195	0.0310589	1.0195	0.0320603	1.0195	0.0333096	1.0195	0.0347449	1.0195	0.0367762	1.0195	0.0347497	1.0195	0.0290037	1.0195	0.0282169	1.0195	0.0284267	1.0195	0.0289989
0.999496	0.0688913	0.999496	0.0434519	0.999496	0.0358464	0.999496	0.0554826	0.999496	0.0233246	0.999496	0.0242926	0.999496	0.0255371	0.999496	0.0227858	0.999496	0.0233532	0.999496	0.0331618	0.999496	0.0258471	0.999496	0.0237108	0.999496	0.0249363	0.999496	0.0260569	0.999496	0.026753	0.999496	0.0271822	0.999496	0.0279928	0.999496	0.0289846	0.999496	0.0301624	0.999496	0.03186	0.999496	0.0313498	0.999496	0.0259329	0.999496	0.0251366	0.999496	0.0252224	0.999496	0.0256468
0.979496	0.0635841	0.979496	0.0425459	0.979496	0.0288845	0.979496	0.0490262	0.979496	0.0205256	0.979496	0.0210501	0.979496	0.0231672	0.979496	0.0195337	0.979496	0.0198294	0.979496	0.0296236	0.979496	0.02311	0.979496	0.0210834	0.979496	0.0220371	0.979496	0.0229288	0.979496	0.02342	0.979496	0.0236917	0.979496	0.0243212	0.979496	0.0250841	0.979496	0.0260664	0.979496	0.0274874	0.979496	0.0281693	0.979496	0.0231148	0.979496	0.0222898	0.979496	0.0223089	0.979496	0.0226093
0.959496	0.0542666	0.959496	0.0365998	0.959496	0.0269295	0.959496	0.0414254	0.959496	0.0205208	0.959496	0.0182081	0.959496	0.0213266	0.959496	0.0165201	0.959496	0.0166393	0.959496	0.0255657	0.959496	0.0205923	0.959496	0.0186229	0.959496	0.0193621	0.959496	0.0200535	0.959496	0.020392	0.959496	0.0205256	0.959496	0.0209881	0.959496	0.0215698	0.959496	0.0223232	0.959496	0.0234867	0.959496	0.0252129	0.959496	0.0205112	0.959496	0.0197197	0.959496	0.0196529	0.959496	0.0198771
0.939496	0.0504996	0.939496	0.0307728	0.939496	0.0248266	0.939496	0.0379969	0.939496	0.0161529	0.939496	0.0155044	0.939496	0.0209833	0.939496	0.0137687	0.939496	0.0137353	0.939496	0.0228382	0.939496	0.0181652	0.939496	0.0162912	0.939496	0.0168396	0.939496	0.0173641	0.939496	0.0175643	0.939496	0.0175787	0.939496	0.0178695	0.939496	0.0182748	0.939496	0.0188614	0.939496	0.0198437	0.939496	0.0225426	0.939496	0.0180793	0.939496	0.0173116	0.939496	0.0171876	0.939496	0.0173021
0.919574	0.0406434	0.919574	0.0274921	0.919574	0.0230051	0.919574	0.035627	0.919574	0.0145507	0.919574	0.0130392	0.919574	0.0139547	0.919574	0.0113035	0.919574	0.011108	0.919574	0.0193239	0.919574	0.0159097	0.919574	0.0141216	0.919574	0.0144887	0.919574	0.0148654	0.919574	0.0149417	0.919574	0.0148607	0.919574	0.0150085	0.919574	0.0152803	0.919574	0.0157142	0.919574	0.0164772	0.919574	0.0200249	0.919574	0.0158334	0.919574	0.0150609	0.919574	0.0149227	0.919574	0.0149465
0.899573	0.0392176	0.899573	0.0235106	0.899573	0.0194431	0.899573	0.0315644	0.899573	0.0118721	0.899573	0.0107258	0.899573	0.0107408	0.899573	0.00902394	0.899573	0.00868443	0.899573	0.0165153	0.899573	0.0138498	0.899573	0.0121677	0.899573	0.012347	0.899573	0.0125957	0.899573	0.0125671	0.899573	0.0124097	0.899573	0.0124288	0.899573	0.0125576	0.899573	0.0128198	0.899573	0.0134206	0.899573	0.0176311	0.899573	0.0137544	0.899573	0.0130105	0.899573	0.0128007	0.899573	0.0127531
0.879574	0.0353505	0.879574	0.0211979	0.879574	0.0176883	0.879574	0.0286032	0.879574	0.0114277	0.879574	0.00864771	0.879574	0.00816992	0.879574	0.00685337	0.879574	0.00650527	0.879574	0.0144077	0.879574	0.0119899	0.879574	0.0103658	0.879574	0.0104373	0.879574	0.0105193	0.879574	0.0104072	0.879574	0.0101383	0.879574	0.0100339	0.879574	0.0100589	0.879574	0.0101686	0.879574	0.0106168	0.879574	0.0154138	0.879574	0.0118301	0.879574	0.0110901	0.879574	0.0108593	0.879574	0.0106924
0.859573	0.0280643	0.859573	0.0170208	0.859573	0.0220037	0.859573	0.0264669	0.859573	0.00972632	0.859573	0.00684431	0.859573	0.00599649	0.859573	0.00502326	0.859573	0.00455453	0.859573	0.0117851	0.859573	0.0103887	0.859573	0.00886038	0.859573	0.00875548	0.859573	0.00870732	0.859573	0.00848034	0.859573	0.00810555	0.859573	0.0079129	0.859573	0.00778368	0.859573	0.00778463	0.859573	0.00805882	0.859573	0.0133825	0.859573	0.0100706	0.859573	0.00933054	0.859573	0.00901345	0.859573	0.00880602
0.839574	0.0254036	0.839574	0.0144172	0.839574	0.0185507	0.839574	0.024202	0.839574	0.00809124	0.839574	0.00516107	0.839574	0.00424696	0.839574	0.00327565	0.839574	0.00274302	0.839574	0.00937823	0.839574	0.00893	0.839574	0.00742653	0.839574	0.00720146	0.839574	0.00700167	0.839574	0.00667551	0.839574	0.00622394	0.839574	0.00590971	0.839574	0.0056608	0.839574	0.00552918	0.839574	0.00565746	0.839574	0.011483	0.839574	0.0084031	0.839574	0.00765493	0.839574	0.00727489	0.839574	0.00701073
0.819573	0.0213505	0.819573	0.0129581	0.819573	0.0175136	0.819573	0.0219751	0.819573	0.00407053	0.819573	0.00363089	0.819573	0.00273729	0.819573	0.001714	0.819573	0.00108362	0.819573	0.00716808	0.819573	0.00755909	0.819573	0.00609329	0.819573	0.00574234	0.819573	0.00544526	0.819573	0.00497748	0.819573	0.0044625	0.819573	0.00403	0.819573	0.0036905	0.819573	0.00341631	0.819573	0.00340296	0.819573	0.00955371	0.819573	0.00681713	0.819573	0.00606468	0.819573	0.00563171	0.819573	0.00529172
0.799573	0.0187183	0.799573	0.0109318	0.799573	0.0173772	0.799573	0.0191284	0.799573	0.00163579	0.799573	0.002136	0.799573	0.00114418	0.799573	0.000201941	0.799573	-0.00051713	0.799573	0.00551917	0.799573	0.00621202	0.799573	0.00480439	0.799573	0.00435616	0.799573	0.00386645	0.799573	0.00333764	0.799573	0.0027268	0.799573	0.00222898	0.799573	0.00177646	0.799573	0.00140357	0.799573	0.00125719	0.799573	0.00808218	0.799573	0.00530507	0.799573	0.00455644	0.799573	0.00407483	0.799573	0.00370385
0.779652	0.0151229	0.779652	0.00872258	0.779652	0.0142706	0.779652	0.0157667	0.779652	0.00047946	0.779652	0.00067163	0.779652	-0.000320196	0.779652	-0.00125146	0.779652	-0.00205494	0.779652	0.00377108	0.779652	0.00488879	0.779652	0.00351931	0.779652	0.00291182	0.779652	0.00234962	0.779652	0.00173736	0.779652	0.00105978	0.779652	0.00048852	0.779652	-7.27177e-05	0.779652	-0.000523806	0.779652	-0.00080133	0.779652	0.00609758	0.779652	0.0038941	0.779652	0.0031655	0.779652	0.00264479	0.779652	0.00219751
0.759651	0.0123334	0.759651	0.00659969	0.759651	0.013778	0.759651	0.0127626	0.759651	-0.000683551	0.759651	-0.0007937	0.759651	-0.00177742	0.759651	-0.00274254	0.759651	-0.00360085	0.759651	0.00187469	0.759651	0.0035813	0.759651	0.00227619	0.759651	0.00160575	0.759651	0.000880961	0.759651	0.000211477	0.759651	-0.000512838	0.759651	-0.00118804	0.759651	-0.00181079	0.759651	-0.00236536	0.759651	-0.00276161	0.759651	0.00422026	0.759651	0.00263382	0.759651	0.00191666	0.759651	0.00134731	0.759651	0.000850444
0.739652	0.00904326	0.739652	0.00476672	0.739652	0.0109261	0.739652	0.0101536	0.739652	-0.00186515	0.739652	-0.00221325	0.739652	-0.00323464	0.739652	-0.00415446	0.739652	-0.00504472	0.739652	-0.000446081	0.739652	0.00238777	0.739652	0.00113369	0.739652	0.000355005	0.739652	-0.000427008	0.739652	-0.0011561	0.739652	-0.00196005	0.739652	-0.0026796	0.739652	-0.00335623	0.739652	-0.0039828	0.739652	-0.0044892	0.739652	0.00290228	0.739652	0.00157762	0.739652	0.000856166	0.739652	0.000263453	0.739652	-0.000293016
0.719651	0.00646617	0.719651	0.00298334	0.719651	0.00963859	0.719651	0.00837639	0.719651	-0.00295282	0.719651	-0.00353266	0.719651	-0.00446918	0.719651	-0.00551536	0.719651	-0.00639703	0.719651	-0.00207926	0.719651	0.00134922	0.719651	0.000117064	0.719651	-0.000737433	0.719651	-0.00159288	0.719651	-0.00238968	0.719651	-0.00321318	0.719651	-0.00399329	0.719651	-0.00474002	0.719651	-0.00544335	0.719651	-0.00601509	0.719651	0.00185371	0.719651	0.000702147	0.719651	-2.98023e-05	0.719651	-0.000669723	0.719651	-0.00127197
0.699651	0.00432421	0.699651	0.0013516	0.699651	0.0097144	0.699651	0.00691107	0.699651	-0.00384881	0.699651	-0.00462749	0.699651	-0.00568464	0.699651	-0.00668695	0.699651	-0.00760391	0.699651	-0.00386645	0.699651	0.000505209	0.699651	-0.000708823	0.699651	-0.00163293	0.699651	-0.00256134	0.699651	-0.00340916	0.699651	-0.00426938	0.699651	-0.00512864	0.699651	-0.00592687	0.699651	-0.00666454	0.699651	-0.00734547	0.699651	0.00106311	0.699651	5.48363e-06	0.699651	-0.000733619	0.699651	-0.00142456	0.699651	-0.00208641
0.679651	0.00267149	0.679651	-3.83854e-05	0.679651	0.00849083	0.679651	0.00541522	0.679651	-0.00462987	0.679651	-0.00567367	0.679651	-0.0067785	0.679651	-0.00787046	0.679651	-0.00878886	0.679651	-0.00468852	0.679651	-0.000189543	0.679651	-0.00143886	0.679651	-0.0024202	0.679651	-0.00340964	0.679651	-0.0043266	0.679651	-0.00527122	0.679651	-0.00616815	0.679651	-0.00699785	0.679651	-0.00783375	0.679651	-0.00854424	0.679651	0.000429869	0.679651	-0.000586271	0.679651	-0.00135303	0.679651	-0.00211645	0.679651	-0.00283218
0.659651	0.00130916	0.659651	-0.00125623	0.659651	0.00632122	0.659651	0.00432469	0.659651	-0.00550677	0.659651	-0.00668504	0.659651	-0.00777987	0.659651	-0.00886277	0.659651	-0.00978259	0.659651	-0.00631645	0.659651	-0.000762229	0.659651	-0.00206114	0.659651	-0.00311018	0.659651	-0.00416543	0.659651	-0.00512864	0.659651	-0.00611618	0.659651	-0.00707796	0.659651	-0.00798538	0.659651	-0.00884512	0.659651	-0.00962047	0.659651	-7.51019e-05	0.659651	-0.00108886	0.659651	-0.00191141	0.659651	-0.00272108	0.659651	-0.00349356
0.639729	0.000183821	0.639729	-0.00223518	0.639729	0.00493648	0.639729	0.002939	0.639729	-0.00628498	0.639729	-0.00759533	0.639729	-0.00868777	0.639729	-0.0097473	0.639729	-0.0107449	0.639729	-0.00748423	0.639729	-0.00126482	0.639729	-0.00260426	0.639729	-0.00369908	0.639729	-0.00482203	0.639729	-0.00585105	0.639729	-0.00688341	0.639729	-0.0078986	0.639729	-0.00885561	0.639729	-0.00976161	0.639729	-0.0106223	0.639729	-0.000501871	0.639729	-0.00152803	0.639729	-0.00242163	0.639729	-0.00327946	0.639729	-0.0041268
0.619729	-0.000740771	0.619729	-0.0031283	0.619729	0.00393178	0.619729	0.00179267	0.619729	-0.00712421	0.619729	-0.0084689	0.619729	-0.00949315	0.619729	-0.0105865	0.619729	-0.0116666	0.619729	-0.0083187	0.619729	-0.00170827	0.619729	-0.00310064	0.619729	-0.00427224	0.619729	-0.00546004	0.619729	-0.00653722	0.619729	-0.00762728	0.619729	-0.00869969	0.619729	-0.00969819	0.619729	-0.010659	0.619729	-0.0115669	0.619729	-0.000891929	0.619729	-0.00194765	0.619729	-0.00287415	0.619729	-0.00380208	0.619729	-0.00470664
0.599729	-0.00144363	0.599729	-0.00390507	0.599729	0.00264431	0.599729	0.000617266	0.599729	-0.00787571	0.599729	-0.0092595	0.599729	-0.0102132	0.599729	-0.011482	0.599729	-0.0124815	0.599729	-0.00920228	0.599729	-0.00212074	0.599729	-0.00359274	0.599729	-0.0048249	0.599729	-0.00606945	0.599729	-0.00720194	0.599729	-0.00834254	0.599729	-0.00948028	0.599729	-0.0105374	0.599729	-0.0115393	0.599729	-0.0124777	0.599729	-0.00124813	0.599729	-0.00234104	0.599729	-0.00333287	0.599729	-0.00432278	0.599729	-0.00528504
0.579729	-0.00211788	0.579729	-0.00502851	0.579729	0.00270105	0.579729	-0.000531912	0.579729	-0.00873164	0.579729	-0.00999478	0.579729	-0.0110481	0.579729	-0.0123084	0.579729	-0.0133346	0.579729	-0.00779894	0.579729	-0.00253941	0.579729	-0.00405289	0.579729	-0.00531747	0.579729	-0.00666406	0.579729	-0.00786903	0.579729	-0.00905398	0.579729	-0.0102275	0.579729	-0.0113509	0.579729	-0.0123957	0.579729	-0.0133832	0.579729	-0.00158525	0.579729	-0.00272013	0.579729	-0.00377394	0.579729	-0.00482633	0.579729	-0.00585439
0.559729	-0.00273825	0.559729	-0.00559737	0.559729	0.00102067	0.559729	-0.00173879	0.559729	-0.00966338	0.559729	-0.0107582	0.559729	-0.0118063	0.559729	-0.013058	0.559729	-0.0141557	0.559729	-0.00977878	0.559729	-0.00292707	0.559729	-0.0045202	0.559729	-0.00589826	0.559729	-0.00725248	0.559729	-0.00851801	0.559729	-0.00976113	0.559729	-0.0109899	0.559729	-0.0121544	0.559729	-0.0132549	0.559729	-0.0143121	0.559729	-0.00191809	0.559729	-0.00309063	0.559729	-0.00421835	0.559729	-0.0053456	0.559729	-0.00643566
0.539729	-0.00339438	0.539729	-0.00610044	0.539729	0.000362635	0.539729	-0.00301052	0.539729	-0.0106781	0.539729	-0.0114634	0.539729	-0.0125635	0.539729	-0.0138639	0.539729	-0.0149525	0.539729	-0.0109508	0.539729	-0.00329997	0.539729	-0.00496938	0.539729	-0.00632122	0.539729	-0.00781754	0.539729	-0.00914601	0.539729	-0.0104568	0.539729	-0.0117276	0.539729	-0.0129416	0.539729	-0.0140989	0.539729	-0.0151804	0.539729	-0.00222517	0.539729	-0.00347067	0.539729	-0.00464751	0.539729	-0.0058253	0.539729	-0.00699594
0.519729	-0.00398184	0.519729	-0.00655868	0.519729	-0.000864749	0.519729	-0.00444867	0.519729	-0.0118468	0.519729	-0.0121506	0.519729	-0.0133069	0.519729	-0.0146964	0.519729	-0.0157302	0.519729	-0.0117019	0.519729	-0.00366904	0.519729	-0.00541093	0.519729	-0.00691917	0.519729	-0.00839165	0.519729	-0.00979594	0.519729	-0.0111292	0.519729	-0.0124686	0.519729	-0.0137342	0.519729	-0.014901	0.519729	-0.0160659	0.519729	-0.00253178	0.519729	-0.00382735	0.519729	-0.00508	0.519729	-0.00632551	0.519729	-0.00755194
0.499728	-0.00452497	0.499728	-0.0070236	0.499728	-0.000440359	0.499728	-0.00585105	0.499728	-0.0131062	0.499728	-0.0128611	0.499728	-0.0140083	0.499728	-0.015426	0.499728	-0.0165628	0.499728	-0.0124376	0.499728	-0.00405051	0.499728	-0.00585105	0.499728	-0.0074189	0.499728	-0.00897006	0.499728	-0.010403	0.499728	-0.0118173	0.499728	-0.0131939	0.499728	-0.0145214	0.499728	-0.0157655	0.499728	-0.01697	0.499728	-0.00285173	0.499728	-0.00420214	0.499728	-0.00550916	0.499728	-0.00681713	0.499728	-0.00810888
0.479807	-0.005039	0.479807	-0.00755432	0.479807	-0.00148988	0.479807	-0.00711086	0.479807	-0.0145343	0.479807	-0.0135696	0.479807	-0.0147484	0.479807	-0.0161884	0.479807	-0.0173438	0.479807	-0.0135873	0.479807	-0.00440146	0.479807	-0.00628974	0.479807	-0.00792149	0.479807	-0.00953225	0.479807	-0.0110476	0.479807	-0.0125101	0.479807	-0.0139516	0.479807	-0.0153049	0.479807	-0.0166462	0.479807	-0.0178455	0.479807	-0.00314404	0.479807	-0.00456979	0.479807	-0.00594213	0.479807	-0.00733736	0.479807	-0.0086644
0.459806	-0.00549056	0.459806	-0.00796917	0.459806	-0.0020702	0.459806	-0.00842694	0.459806	-0.016032	0.459806	-0.0142277	0.459806	-0.0155156	0.459806	-0.0169728	0.459806	-0.0182141	0.459806	-0.0142382	0.459806	-0.00477674	0.459806	-0.0067332	0.459806	-0.00845507	0.459806	-0.0101397	0.459806	-0.0117057	0.459806	-0.0132287	0.459806	-0.0147226	0.459806	-0.0161408	0.459806	-0.0174864	0.459806	-0.018781	0.459806	-0.00344445	0.459806	-0.00495603	0.459806	-0.00639513	0.459806	-0.0078409	0.459806	-0.00926283
0.439806	-0.00595214	0.439806	-0.0083969	0.439806	-0.00284363	0.439806	-0.00986938	0.439806	-0.0176666	0.439806	-0.0149334	0.439806	-0.0162352	0.439806	-0.0177124	0.439806	-0.0190151	0.439806	-0.0155666	0.439806	-0.005111	0.439806	-0.0071657	0.439806	-0.00857571	0.439806	-0.0107162	0.439806	-0.012338	0.439806	-0.013922	0.439806	-0.0154746	0.439806	-0.016939	0.439806	-0.0183485	0.439806	-0.0196861	0.439806	-0.00374962	0.439806	-0.00531985	0.439806	-0.00682189	0.439806	-0.00835923	0.439806	-0.00984267
0.419806	-0.00637033	0.419806	-0.00888232	0.419806	-0.00389363	0.419806	-0.011761	0.419806	-0.0191653	0.419806	-0.0156072	0.419806	-0.0170172	0.419806	-0.0184992	0.419806	-0.0197314	0.419806	-0.0166753	0.419806	-0.0054672	0.419806	-0.00759867	0.419806	-0.0090144	0.419806	-0.0112865	0.419806	-0.012965	0.419806	-0.0146244	0.419806	-0.0162089	0.419806	-0.0177434	0.419806	-0.0192002	0.419806	-0.0205825	0.419806	-0.00404145	0.419806	-0.00569465	0.419806	-0.00728634	0.419806	-0.0088704	0.419806	-0.0104196
0.399806	-0.00677564	0.399806	-0.0092552	0.399806	-0.00402905	0.399806	-0.0133551	0.399806	-0.0208743	0.399806	-0.0162767	0.399806	-0.017701	0.399806	-0.0192688	0.399806	-0.0206059	0.399806	-0.0178793	0.399806	-0.00582864	0.399806	-0.00804213	0.399806	-0.00963143	0.399806	-0.0118449	0.399806	-0.0136354	0.399806	-0.0153201	0.399806	-0.0169514	0.399806	-0.0185679	0.399806	-0.0200356	0.399806	-0.0215185	0.399806	-0.00433375	0.399806	-0.00606563	0.399806	-0.00773504	0.399806	-0.00939158	0.399806	-0.0110028
0.379807	-0.00714424	0.379807	-0.00964717	0.379807	-0.0047796	0.379807	-0.0147141	0.379807	-0.0224059	0.379807	-0.0170468	0.379807	-0.0185626	0.379807	-0.0200456	0.379807	-0.0214394	0.379807	-0.0173519	0.379807	-0.00619342	0.379807	-0.00847176	0.379807	-0.010525	0.379807	-0.0124376	0.379807	-0.0142715	0.379807	-0.0160311	0.379807	-0.0177444	0.379807	-0.0193742	0.379807	-0.0209382	0.379807	-0.022445	0.379807	-0.00463416	0.379807	-0.00645378	0.379807	-0.00820712	0.379807	-0.00993947	0.379807	-0.0116094
0.359806	-0.00754192	0.359806	-0.0101011	0.359806	-0.00578668	0.359806	-0.016012	0.359806	-0.0240725	0.359806	-0.017772	0.359806	-0.0192388	0.359806	-0.0208481	0.359806	-0.0223106	0.359806	-0.0184057	0.359806	-0.00658777	0.359806	-0.00893477	0.359806	-0.0110863	0.359806	-0.0130466	0.359806	-0.0149634	0.359806	-0.0168064	0.359806	-0.0185521	0.359806	-0.020232	0.359806	-0.0218786	0.359806	-0.0234173	0.359806	-0.00494411	0.359806	-0.00685575	0.359806	-0.00868491	0.359806	-0.0104959	0.359806	-0.0122445
0.339884	-0.00788906	0.339884	-0.0105098	0.339884	-0.00598218	0.339884	-0.0172218	0.339884	-0.0254048	0.339884	-0.0184172	0.339884	-0.0199412	0.339884	-0.0216478	0.339884	-0.0230978	0.339884	-0.018585	0.339884	-0.00693348	0.339884	-0.00937823	0.339884	-0.0116218	0.339884	-0.0136493	0.339884	-0.0156358	0.339884	-0.017516	0.339884	-0.0193375	0.339884	-0.0211008	0.339884	-0.0227741	0.339884	-0.0243643	0.339884	-0.00525453	0.339884	-0.00724962	0.339884	-0.00916508	0.339884	-0.0110462	0.339884	-0.0128639
0.319884	-0.00827578	0.319884	-0.0109327	0.319884	-0.00602415	0.319884	-0.0182918	0.319884	-0.0265196	0.319884	-0.019182	0.319884	-0.0206998	0.319884	-0.0224718	0.319884	-0.0239757	0.319884	-0.0188111	0.319884	-0.00732782	0.319884	-0.00983266	0.319884	-0.0121749	0.319884	-0.0143016	0.319884	-0.0163549	0.319884	-0.0182937	0.319884	-0.0201925	0.319884	-0.0219978	0.319884	-0.0237263	0.319884	-0.0253805	0.319884	-0.00557162	0.319884	-0.00766924	0.319884	-0.00967101	0.319884	-0.0116198	0.319884	-0.013522
0.299884	-0.00869587	0.299884	-0.0114024	0.299884	-0.00646284	0.299884	-0.0190376	0.299884	-0.02679	0.299884	-0.0198386	0.299884	-0.0215147	0.299884	-0.0232814	0.299884	-0.0248827	0.299884	-0.0194944	0.299884	-0.00770405	0.299884	-0.0103391	0.299884	-0.0127223	0.299884	-0.0149177	0.299884	-0.0170668	0.299884	-0.01907	0.299884	-0.0210236	0.299884	-0.022889	0.299884	-0.0246719	0.299884	-0.0263957	0.299884	-0.00592782	0.299884	-0.00809505	0.299884	-0.0101893	0.299884	-0.0122259	0.299884	-0.0141914
0.279884	-0.00907687	0.279884	-0.0118125	0.279884	-0.00700644	0.279884	-0.019173	0.279884	-0.0263485	0.279884	-0.0206908	0.279884	-0.02227	0.279884	-0.0241831	0.279884	-0.025772	0.279884	-0.0205992	0.279884	-0.00807646	0.279884	-0.0108097	0.279884	-0.0133088	0.279884	-0.0155905	0.279884	-0.017793	0.279884	-0.019873	0.279884	-0.0219024	0.279884	-0.0238427	0.279884	-0.0257524	0.279884	-0.02746	0.279884	-0.00623109	0.279884	-0.00854233	0.279884	-0.0107348	0.279884	-0.0128639	0.279884	-0.0148795
0.259884	-0.00944022	0.259884	-0.0122812	0.259884	-0.00760105	0.259884	-0.0181463	0.259884	-0.0250658	0.259884	-0.021437	0.259884	-0.0231288	0.259884	-0.0249423	0.259884	-0.026708	0.259884	-0.0214041	0.259884	-0.00849465	0.259884	-0.0113233	0.259884	-0.0138953	0.259884	-0.0162767	0.259884	-0.0185703	0.259884	-0.020696	0.259884	-0.0228032	0.259884	-0.0247644	0.259884	-0.0267633	0.259884	-0.0285257	0.259884	-0.00660017	0.259884	-0.00901106	0.259884	-0.0112913	0.259884	-0.0134805	0.259884	-0.0156181
0.239883	-0.00988511	0.239883	-0.0127094	0.239883	-0.00831584	0.239883	-0.0172685	0.239883	-0.0238284	0.239883	-0.0222753	0.239883	-0.0240467	0.239883	-0.026049	0.239883	-0.0276974	0.239883	-0.0226224	0.239883	-0.00892809	0.239883	-0.0118649	0.239883	-0.0145662	0.239883	-0.0170015	0.239883	-0.0193532	0.239883	-0.0216082	0.239883	-0.0237516	0.239883	-0.0258015	0.239883	-0.0278796	0.239883	-0.0297092	0.239883	-0.00695827	0.239883	-0.00948028	0.239883	-0.011875	0.239883	-0.0141614	0.239883	-0.0163839
0.219884	-0.0103004	0.219884	-0.013182	0.219884	-0.00881842	0.219884	-0.0171092	0.219884	-0.0234068	0.219884	-0.0231927	0.219884	-0.0251001	0.219884	-0.0268568	0.219884	-0.0287412	0.219884	-0.0233329	0.219884	-0.0093439	0.219884	-0.0124043	0.219884	-0.0151742	0.219884	-0.0177196	0.219884	-0.0201863	0.219884	-0.022538	0.219884	-0.0247215	0.219884	-0.0268181	0.219884	-0.0289663	0.219884	-0.030888	0.219884	-0.00733879	0.219884	-0.00996617	0.219884	-0.0124705	0.219884	-0.0148533	0.219884	-0.0171602
0.199962	-0.0107005	0.199962	-0.0136951	0.199962	-0.00958423	0.199962	-0.017372	0.199962	-0.0236257	0.199962	-0.0240601	0.199962	-0.0258387	0.199962	-0.0278758	0.199962	-0.0298079	0.199962	-0.0232724	0.199962	-0.00980023	0.199962	-0.0129421	0.199962	-0.0158108	0.199962	-0.0184935	0.199962	-0.0210327	0.199962	-0.0233763	0.199962	-0.0257066	0.199962	-0.0278963	0.199962	-0.0300764	0.199962	-0.0320624	0.199962	-0.00770977	0.199962	-0.0104902	0.199962	-0.0130823	0.199962	-0.0155643	0.199962	-0.0179532
0.179961	-0.0111173	0.179961	-0.0142124	0.179961	-0.0102837	0.179961	-0.0174702	0.179961	-0.0241297	0.179961	-0.0249856	0.179961	-0.0268024	0.179961	-0.0288752	0.179961	-0.0308784	0.179961	-0.0237277	0.179961	-0.0102365	0.179961	-0.0135239	0.179961	-0.0164903	0.179961	-0.0192621	0.179961	-0.0218972	0.179961	-0.0243538	0.179961	-0.0267347	0.179961	-0.028983	0.179961	-0.0312699	0.179961	-0.0333322	0.179961	-0.0081127	0.179961	-0.0110281	0.179961	-0.0137609	0.179961	-0.0163448	0.179961	-0.0187948
0.159962	-0.0115483	0.159962	-0.0147884	0.159962	-0.0110677	0.159962	-0.0177501	0.159962	-0.0248726	0.159962	-0.0259617	0.159962	-0.0278057	0.159962	-0.0300015	0.159962	-0.0320247	0.159962	-0.0241211	0.159962	-0.0106957	0.159962	-0.0141209	0.159962	-0.0172427	0.159962	-0.0200938	0.159962	-0.022807	0.159962	-0.0253709	0.159962	-0.0278333	0.159962	-0.0301908	0.159962	-0.0325364	0.159962	-0.0346559	0.159962	-0.00854472	0.159962	-0.0115736	0.159962	-0.0144008	0.159962	-0.0171469	0.159962	-0.019687
0.139961	-0.0120109	0.139961	-0.0153473	0.139961	-0.0118926	0.139961	-0.0179332	0.139961	-0.0257	0.139961	-0.0271009	0.139961	-0.0289215	0.139961	-0.0312265	0.139961	-0.033275	0.139961	-0.025854	0.139961	-0.0112327	0.139961	-0.014747	0.139961	-0.0179976	0.139961	-0.0209502	0.139961	-0.0238145	0.139961	-0.0263957	0.139961	-0.0289825	0.139961	-0.031433	0.139961	-0.0338134	0.139961	-0.0361332	0.139961	-0.00898102	0.139961	-0.0121806	0.139961	-0.0151547	0.139961	-0.0179871	0.139961	-0.0206283
0.119962	-0.0124963	0.119962	-0.01595	0.119962	-0.0127008	0.119962	-0.0182904	0.119962	-0.0266007	0.119962	-0.0281633	0.119962	-0.0300578	0.119962	-0.0324296	0.119962	-0.0345286	0.119962	-0.0277175	0.119962	-0.0117467	0.119962	-0.0154117	0.119962	-0.0188001	0.119962	-0.0218609	0.119962	-0.0247992	0.119962	-0.0275305	0.119962	-0.030176	0.119962	-0.0326785	0.119962	-0.0351867	0.119962	-0.037495	0.119962	-0.00944356	0.119962	-0.0127924	0.119962	-0.0158761	0.119962	-0.0188273	0.119962	-0.0215834
0.0999613	-0.0129445	0.0999613	-0.016527	0.0999613	-0.013707	0.0999613	-0.0190233	0.0999613	-0.0276741	0.0999613	-0.0293859	0.0999613	-0.0312241	0.0999613	-0.0336417	0.0999613	-0.0358304	0.0999613	-0.0296682	0.0999613	-0.0122717	0.0999613	-0.0161255	0.0999613	-0.0196198	0.0999613	-0.0227645	0.0999613	-0.0258106	0.0999613	-0.0286778	0.0999613	-0.0313791	0.0999613	-0.0340036	0.0999613	-0.036548	0.0999613	-0.0390052	0.0999613	-0.00993184	0.0999613	-0.0134433	0.0999613	-0.0166381	0.0999613	-0.01979	0.0999613	-0.0225919
0.0799608	-0.0134891	0.0799608	-0.0172318	0.0799608	-0.0148843	0.0799608	-0.0196589	0.0799608	-0.0284613	0.0799608	-0.0305408	0.0799608	-0.0324181	0.0799608	-0.0348181	0.0799608	-0.0371589	0.0799608	-0.0318149	0.0799608	-0.0128048	0.0799608	-0.0168126	0.0799608	-0.020419	0.0799608	-0.0237091	0.0799608	-0.0268763	0.0799608	-0.0297936	0.0799608	-0.0325846	0.0799608	-0.0353455	0.0799608	-0.0379914	0.0799608	-0.0404867	0.0799608	-0.010434	0.0799608	-0.0141171	0.0799608	-0.0174387	0.0799608	-0.0206617	0.0799608	-0.0236262
0.0600395	-0.0140694	0.0600395	-0.0179322	0.0600395	-0.0160468	0.0600395	-0.0201882	0.0600395	-0.029714	0.0600395	-0.0318211	0.0600395	-0.0338096	0.0600395	-0.0362095	0.0600395	-0.0386309	0.0600395	-0.0339917	0.0600395	-0.0134275	0.0600395	-0.0175942	0.0600395	-0.0213402	0.0600395	-0.024772	0.0600395	-0.028046	0.0600395	-0.0310873	0.0600395	-0.033996	0.0600395	-0.036807	0.0600395	-0.0395555	0.0600395	-0.042138	0.0600395	-0.0109861	0.0600395	-0.0148504	0.0600395	-0.0183252	0.0600395	-0.0216659	0.0600395	-0.0247401
0.0400391	-0.0147331	0.0400391	-0.0186814	0.0400391	-0.0173171	0.0400391	-0.0208729	0.0400391	-0.030641	0.0400391	-0.0332569	0.0400391	-0.035293	0.0400391	-0.0377039	0.0400391	-0.0401649	0.0400391	-0.0363287	0.0400391	-0.0140412	0.0400391	-0.0183662	0.0400391	-0.02227	0.0400391	-0.0258683	0.0400391	-0.0292295	0.0400391	-0.0324281	0.0400391	-0.0354289	0.0400391	-0.0382942	0.0400391	-0.0411472	0.0400391	-0.0438298	0.0400391	-0.011576	0.0400391	-0.0155972	0.0400391	-0.0192536	0.0400391	-0.0226916	0.0400391	-0.0258964
0.0200396	-0.0154112	0.0200396	-0.0195096	0.0200396	-0.0186594	0.0200396	-0.0219205	0.0200396	-0.0317844	0.0200396	-0.0347065	0.0200396	-0.0367192	0.0200396	-0.0393046	0.0200396	-0.0417804	0.0200396	-0.0387625	0.0200396	-0.0146754	0.0200396	-0.0192025	0.0200396	-0.0232328	0.0200396	-0.0269235	0.0200396	-0.0304331	0.0200396	-0.033729	0.0200396	-0.0367855	0.0200396	-0.0398244	0.0200396	-0.0427097	0.0200396	-0.0455045	0.0200396	-0.0121902	0.0200396	-0.0163272	0.0200396	-0.020172	0.0200396	-0.0237449	0.0200396	-0.0270842
[truncated: 110 more columns]
