# Supplementary material for: Fabrication of a graphite-paraffin carbon paste electrode and demonstration of its use in electrochemical detection strategies
Source: Royal Society of Chemistry journal article supplement (doi:10.1039/d4an00392f), 2024-01-01

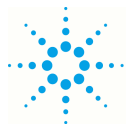

# Agilent Technologies

Sample ID: Stuart M Carbon Paste

Method Name: ATR 32 4cm

Sample Scans: 32

User: STUDENT

Background Scans: 32

Date/Time: 09/05/2024 23:56:04

Resolution: 4 cm<sup>-1</sup>

Range: 4,000.00 - 650.00

System Status: Good

Apodization: Happ-Genzel

File Location: C:\Program Files (x86)\Agilent\MicroLab PC\Results\ATR 32 4cm\Stuart M Carbon Paste\_2024-05-09T23-57-21.a2r

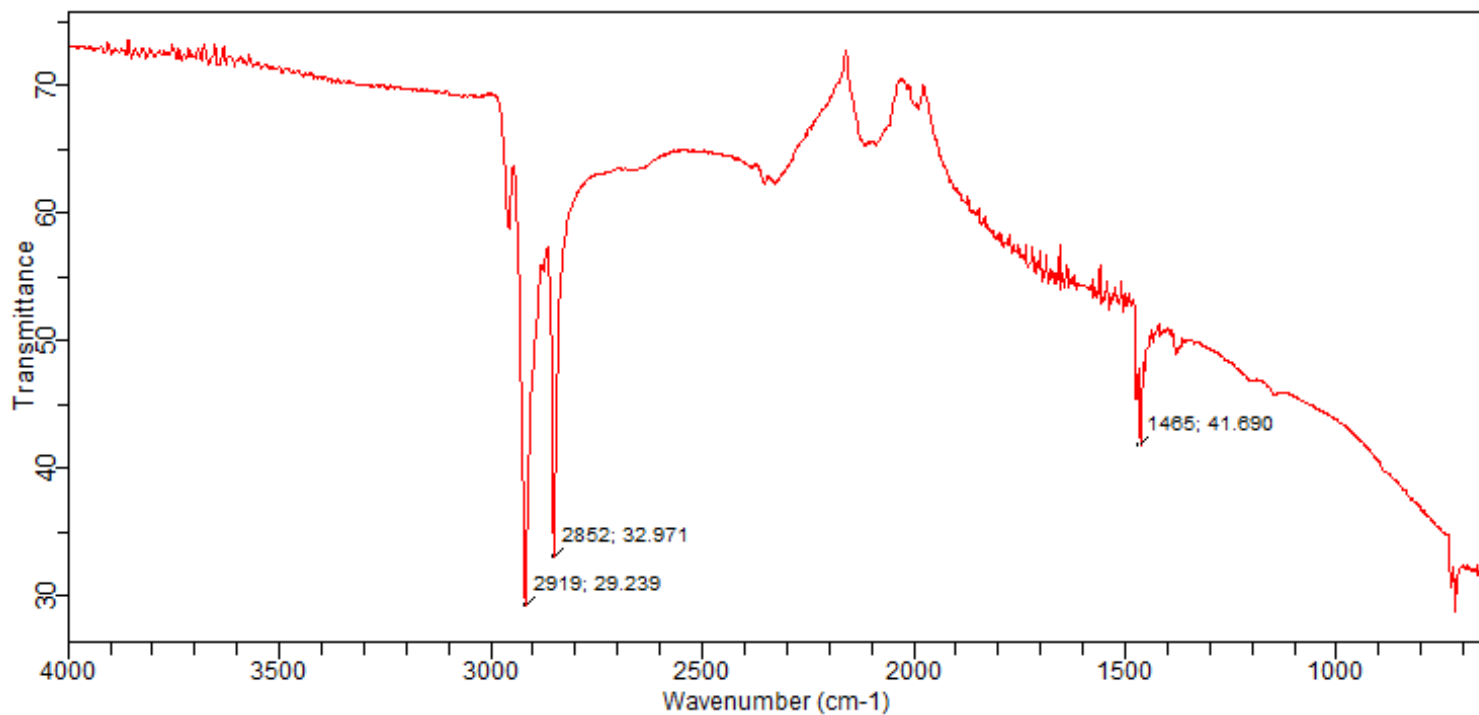

Supplement: d4an00392f2.zip [file d4an00392f2.zip]
