# Supplementary material for: Fabrication of a graphite-paraffin carbon paste electrode and demonstration of its use in electrochemical detection strategies
Source: Royal Society of Chemistry journal article supplement (doi:10.1039/d4an00392f), 2024-01-01
Supplement: d4an00392f2.zip [file d4an00392f2.zip]

## Sheet: Sheet1
CV i vs E Channel 1 Scan 1		CV i vs E Channel 1 Scan 2		CV i vs E Channel 1 Scan 3		CV i vs E Channel 1 Scan 4		CV i vs E Channel 1 Scan 5		CV i vs E Channel 1 Scan 6		CV i vs E Channel 1 Scan 7		CV i vs E Channel 1 Scan 8		CV i vs E Channel 1 Scan 9		CV i vs E Channel 1 Scan 10		CV i vs E Channel 2 Scan 1		CV i vs E Channel 2 Scan 2		CV i vs E Channel 2 Scan 3		CV i vs E Channel 2 Scan 4		CV i vs E Channel 2 Scan 5		CV i vs E Channel 2 Scan 6		CV i vs E Channel 2 Scan 7		CV i vs E Channel 2 Scan 8		CV i vs E Channel 2 Scan 9		CV i vs E Channel 2 Scan 10		CV i vs E Channel 3 Scan 1		CV i vs E Channel 3 Scan 2		CV i vs E Channel 3 Scan 3		CV i vs E Channel 3 Scan 4		CV i vs E Channel 3 Scan 5
V	µA	V	µA	V	µA	V	µA	V	µA	V	µA	V	µA	V	µA	V	µA	V	µA	V	µA	V	µA	V	µA	V	µA	V	µA	V	µA	V	µA	V	µA	V	µA	V	µA	V	µA	V	µA	V	µA	V	µA	V	µA
3.91006e-05	-0.00786781	3.91006e-05	-0.0205682	3.91006e-05	-0.0248049	3.91006e-05	-0.0282692	3.91006e-05	-0.0316476	3.91006e-05	-0.0349091	3.91006e-05	-0.0380224	3.91006e-05	-0.0407209	3.91006e-05	-0.0433034	3.91006e-05	-0.0457615	3.91006e-05	0.00739098	3.91006e-05	-0.0603702	3.91006e-05	-0.0744227	3.91006e-05	-0.0876835	3.91006e-05	-0.0993089	3.91006e-05	-0.110896	3.91006e-05	-0.12141	3.91006e-05	-0.12635	3.91006e-05	-0.133799	3.91006e-05	-0.141748	3.91006e-05	-0.0574589	3.91006e-05	-0.149649	3.91006e-05	-0.188931	3.91006e-05	-0.229424	3.91006e-05	-0.298709
-0.0199614	-0.00691414	-0.0199614	-0.0216502	-0.0199614	-0.0265688	-0.0199614	-0.029817	-0.0199614	-0.0334157	-0.0199614	-0.036723	-0.0199614	-0.0399059	-0.0199614	-0.0427632	-0.0199614	-0.0454296	-0.0199614	-0.0479206	-0.0199614	-0.00119209	-0.0199614	-0.0646331	-0.0199614	-0.0789812	-0.0199614	-0.0922373	-0.0199614	-0.104144	-0.0199614	-0.115869	-0.0199614	-0.127194	-0.0199614	-0.132282	-0.0199614	-0.139659	-0.0199614	-0.14777	-0.0199614	-0.0455379	-0.0199614	-0.152052	-0.0199614	-0.192159	-0.0199614	-0.232323	-0.0199614	-0.301841
-0.0399609	-0.00691414	-0.0399609	-0.0228575	-0.0399609	-0.0276874	-0.0399609	-0.0314907	-0.0399609	-0.0351161	-0.0399609	-0.0386261	-0.0399609	-0.0419549	-0.0399609	-0.0448474	-0.0399609	-0.0476136	-0.0399609	-0.0501132	-0.0399609	-0.00596046	-0.0399609	-0.0691393	-0.0399609	-0.0833777	-0.0399609	-0.096877	-0.0399609	-0.108989	-0.0399609	-0.120314	-0.0399609	-0.132621	-0.0399609	-0.138033	-0.0399609	-0.146182	-0.0399609	-0.153897	-0.0399609	-0.0422001	-0.0399609	-0.154594	-0.0399609	-0.195368	-0.0399609	-0.235022	-0.0399609	-0.30486
-0.0599613	-0.00739098	-0.0599613	-0.0241307	-0.0599613	-0.0290502	-0.0599613	-0.0331863	-0.0599613	-0.0369019	-0.0599613	-0.0405668	-0.0599613	-0.0441264	-0.0599613	-0.0469827	-0.0599613	-0.0498557	-0.0599613	-0.0525214	-0.0599613	-0.00882149	-0.0599613	-0.0737551	-0.0599613	-0.0882939	-0.0599613	-0.101622	-0.0599613	-0.114229	-0.0599613	-0.125702	-0.0599613	-0.137675	-0.0599613	-0.144375	-0.0599613	-0.151971	-0.0599613	-0.160716	-0.0599613	-0.0412464	-0.0599613	-0.156854	-0.0599613	-0.198954	-0.0599613	-0.237964	-0.0599613	-0.307916
-0.0798826	-0.00786781	-0.0798826	-0.0254673	-0.0798826	-0.0305232	-0.0798826	-0.0348381	-0.0798826	-0.038763	-0.0798826	-0.0425004	-0.0798826	-0.0461449	-0.0798826	-0.0491952	-0.0798826	-0.0528278	-0.0798826	-0.0547721	-0.0798826	-0.0112057	-0.0798826	-0.078285	-0.0798826	-0.0932244	-0.0798826	-0.106795	-0.0798826	-0.119579	-0.0798826	-0.13099	-0.0798826	-0.146115	-0.0798826	-0.150736	-0.0798826	-0.158146	-0.0798826	-0.166906	-0.0798826	-0.0417233	-0.0798826	-0.159419	-0.0798826	-0.202115	-0.0798826	-0.240992	-0.0798826	-0.311097
-0.0998831	-0.00760555	-0.0998831	-0.0268515	-0.0998831	-0.0322017	-0.0998831	-0.036663	-0.0998831	-0.0406736	-0.0998831	-0.0445389	-0.0998831	-0.0481848	-0.0998831	-0.0514187	-0.0998831	-0.0544574	-0.0998831	-0.0572422	-0.0998831	-0.0127554	-0.0998831	-0.0829104	-0.0998831	-0.097907	-0.0998831	-0.111969	-0.0998831	-0.125216	-0.0998831	-0.136731	-0.0998831	-0.150083	-0.0998831	-0.157731	-0.0998831	-0.160721	-0.0998831	-0.173538	-0.0998831	-0.0415087	-0.0998831	-0.162352	-0.0998831	-0.205191	-0.0998831	-0.243896	-0.0998831	-0.314659
-0.119884	-0.00841618	-0.119884	-0.0281685	-0.119884	-0.0337671	-0.119884	-0.0385431	-0.119884	-0.0425567	-0.119884	-0.0466179	-0.119884	-0.0504951	-0.119884	-0.0536229	-0.119884	-0.0567749	-0.119884	-0.0596836	-0.119884	-0.0150442	-0.119884	-0.0876883	-0.119884	-0.102914	-0.119884	-0.117443	-0.119884	-0.13078	-0.119884	-0.142439	-0.119884	-0.155643	-0.119884	-0.163568	-0.119884	-0.169347	-0.119884	-0.180286	-0.119884	-0.0429392	-0.119884	-0.164745	-0.119884	-0.208519	-0.119884	-0.247129	-0.119884	-0.31824
-0.139883	-0.00946522	-0.139883	-0.0296816	-0.139883	-0.0354299	-0.139883	-0.04047	-0.139883	-0.0446171	-0.139883	-0.0486874	-0.139883	-0.0527169	-0.139883	-0.0558593	-0.139883	-0.0590875	-0.139883	-0.0619438	-0.139883	-0.0173807	-0.139883	-0.0922898	-0.139883	-0.108097	-0.139883	-0.122598	-0.139883	-0.136273	-0.139883	-0.148194	-0.139883	-0.160773	-0.139883	-0.169924	-0.139883	-0.177439	-0.139883	-0.186513	-0.139883	-0.0447989	-0.139883	-0.167678	-0.139883	-0.211862	-0.139883	-0.250209	-0.139883	-0.321802
-0.159883	-0.0102758	-0.159883	-0.0310606	-0.159883	-0.037116	-0.159883	-0.0423392	-0.159883	-0.0464906	-0.159883	-0.0510621	-0.159883	-0.054691	-0.159883	-0.0581338	-0.159883	-0.0613906	-0.159883	-0.0642421	-0.159883	-0.0196695	-0.159883	-0.0971726	-0.159883	-0.113333	-0.159883	-0.127929	-0.159883	-0.141981	-0.159883	-0.153983	-0.159883	-0.166124	-0.159883	-0.175951	-0.159883	-0.184186	-0.159883	-0.19337	-0.159883	-0.0465631	-0.159883	-0.170558	-0.159883	-0.215867	-0.159883	-0.253395	-0.159883	-0.325793
-0.179883	-0.0113726	-0.179883	-0.0326718	-0.179883	-0.0404443	-0.179883	-0.0442509	-0.179883	-0.048397	-0.179883	-0.0528409	-0.179883	-0.0568035	-0.179883	-0.0603416	-0.179883	-0.0636222	-0.179883	-0.0665786	-0.179883	-0.0222445	-0.179883	-0.101765	-0.179883	-0.118316	-0.179883	-0.133203	-0.179883	-0.147293	-0.179883	-0.159605	-0.179883	-0.171498	-0.179883	-0.181773	-0.179883	-0.190809	-0.179883	-0.199555	-0.179883	-0.0522375	-0.179883	-0.173662	-0.179883	-0.219348	-0.179883	-0.256456	-0.179883	-0.329703
-0.199883	-0.0125099	-0.199883	-0.0342564	-0.199883	-0.0407008	-0.199883	-0.0462956	-0.199883	-0.050498	-0.199883	-0.0550391	-0.199883	-0.0591018	-0.199883	-0.0626304	-0.199883	-0.0659635	-0.199883	-0.0689819	-0.199883	-0.0248505	-0.199883	-0.106204	-0.199883	-0.12368	-0.199883	-0.138591	-0.199883	-0.153025	-0.199883	-0.165513	-0.199883	-0.177787	-0.199883	-0.187929	-0.199883	-0.197652	-0.199883	-0.20654	-0.199883	-0.0539233	-0.199883	-0.17659	-0.199883	-0.223125	-0.199883	-0.26008	-0.199883	-0.334295
-0.219806	-0.0139261	-0.219806	-0.0361246	-0.219806	-0.0426473	-0.219806	-0.0485639	-0.219806	-0.0524928	-0.219806	-0.0573089	-0.219806	-0.0613334	-0.219806	-0.0650289	-0.219806	-0.0683763	-0.219806	-0.0714615	-0.219806	-0.0279881	-0.219806	-0.110338	-0.219806	-0.12935	-0.219806	-0.145028	-0.219806	-0.158847	-0.219806	-0.171531	-0.219806	-0.183805	-0.219806	-0.194414	-0.219806	-0.204523	-0.219806	-0.213374	-0.219806	-0.0564029	-0.219806	-0.180486	-0.219806	-0.227097	-0.219806	-0.263742	-0.219806	-0.33914
-0.239805	-0.0153423	-0.239805	-0.0381903	-0.239805	-0.0448465	-0.239805	-0.0509529	-0.239805	-0.0548341	-0.239805	-0.0598457	-0.239805	-0.0639656	-0.239805	-0.06758	-0.239805	-0.0710228	-0.239805	-0.074251	-0.239805	-0.0313641	-0.239805	-0.116151	-0.239805	-0.135482	-0.239805	-0.151218	-0.239805	-0.165098	-0.239805	-0.178178	-0.239805	-0.190724	-0.239805	-0.201691	-0.239805	-0.213269	-0.239805	-0.221237	-0.239805	-0.0592735	-0.239805	-0.183833	-0.239805	-0.231193	-0.239805	-0.268191	-0.239805	-0.344757
-0.259806	-0.0169015	-0.259806	-0.0402993	-0.259806	-0.0473103	-0.259806	-0.0535895	-0.259806	-0.057471	-0.259806	-0.0625255	-0.259806	-0.0668695	-0.259806	-0.0705269	-0.259806	-0.074127	-0.259806	-0.0774029	-0.259806	-0.0352265	-0.259806	-0.121882	-0.259806	-0.142186	-0.259806	-0.157974	-0.259806	-0.172098	-0.259806	-0.185841	-0.259806	-0.198539	-0.259806	-0.209759	-0.259806	-0.222286	-0.259806	-0.229886	-0.259806	-0.0624301	-0.259806	-0.191229	-0.259806	-0.235885	-0.259806	-0.273036	-0.259806	-0.351066
-0.279806	-0.0185609	-0.279806	-0.0424728	-0.279806	-0.0499758	-0.279806	-0.0565841	-0.279806	-0.0605133	-0.279806	-0.0658538	-0.279806	-0.0701597	-0.279806	-0.0740459	-0.279806	-0.077751	-0.279806	-0.0810936	-0.279806	-0.0394894	-0.279806	-0.12853	-0.279806	-0.149644	-0.279806	-0.165418	-0.279806	-0.180214	-0.279806	-0.194376	-0.279806	-0.207375	-0.279806	-0.219277	-0.279806	-0.2326	-0.279806	-0.240587	-0.279806	-0.0660064	-0.279806	-0.195287	-0.279806	-0.24093	-0.279806	-0.278796	-0.279806	-0.358509
-0.299806	-0.0205391	-0.299806	-0.0447974	-0.299806	-0.0529079	-0.299806	-0.0602844	-0.299806	-0.0642755	-0.299806	-0.0697878	-0.299806	-0.074456	-0.299806	-0.0785234	-0.299806	-0.082424	-0.299806	-0.0862053	-0.299806	-0.0436188	-0.299806	-0.135506	-0.299806	-0.15868	-0.299806	-0.174888	-0.299806	-0.190204	-0.299806	-0.205382	-0.299806	-0.218976	-0.299806	-0.231431	-0.299806	-0.247649	-0.299806	-0.254625	-0.299806	-0.0698355	-0.299806	-0.200828	-0.299806	-0.246991	-0.299806	-0.285724	-0.299806	-0.368036
-0.319806	-0.0228065	-0.319806	-0.0475234	-0.319806	-0.0566413	-0.319806	-0.0647619	-0.319806	-0.0689247	-0.319806	-0.0748756	-0.319806	-0.0799683	-0.319806	-0.08436	-0.319806	-0.0887278	-0.319806	-0.0927332	-0.319806	-0.0496032	-0.319806	-0.144585	-0.319806	-0.170696	-0.319806	-0.187267	-0.319806	-0.203017	-0.319806	-0.219811	-0.319806	-0.234178	-0.319806	-0.24773	-0.319806	-0.272368	-0.319806	-0.274724	-0.319806	-0.0746849	-0.319806	-0.206884	-0.319806	-0.254077	-0.319806	-0.294818	-0.319806	-0.379352
-0.339806	-0.02571	-0.339806	-0.0512251	-0.339806	-0.0614192	-0.339806	-0.0705364	-0.339806	-0.0754908	-0.339806	-0.0820569	-0.339806	-0.08786	-0.339806	-0.093067	-0.339806	-0.0978784	-0.339806	-0.102489	-0.339806	-0.0572612	-0.339806	-0.155871	-0.339806	-0.187052	-0.339806	-0.204151	-0.339806	-0.221165	-0.339806	-0.24052	-0.339806	-0.25534	-0.339806	-0.270995	-0.339806	-0.302743	-0.339806	-0.301613	-0.339806	-0.0807312	-0.339806	-0.21921	-0.339806	-0.264786	-0.339806	-0.306872	-0.339806	-0.39494
-0.359728	-0.0295833	-0.359728	-0.0561072	-0.359728	-0.0678327	-0.359728	-0.0787905	-0.359728	-0.0849703	-0.359728	-0.0925044	-0.359728	-0.0994138	-0.359728	-0.105465	-0.359728	-0.111292	-0.359728	-0.116933	-0.359728	-0.0676086	-0.359728	-0.170882	-0.359728	-0.20954	-0.359728	-0.227569	-0.359728	-0.246523	-0.359728	-0.274132	-0.359728	-0.285953	-0.359728	-0.304302	-0.359728	-0.33717	-0.359728	-0.34109	-0.359728	-0.0944833	-0.359728	-0.236896	-0.359728	-0.277895	-0.359728	-0.323304	-0.359728	-0.434283
-0.379728	-0.0345863	-0.379728	-0.063236	-0.379728	-0.0816897	-0.379728	-0.090926	-0.379728	-0.0986222	-0.379728	-0.107835	-0.379728	-0.116389	-0.379728	-0.123871	-0.379728	-0.131376	-0.379728	-0.138429	-0.379728	-0.0817278	-0.379728	-0.190709	-0.379728	-0.242265	-0.379728	-0.259842	-0.379728	-0.283941	-0.379728	-0.319079	-0.379728	-0.330919	-0.379728	-0.353249	-0.379728	-0.391211	-0.379728	-0.398788	-0.379728	-0.104568	-0.379728	-0.234669	-0.379728	-0.294965	-0.379728	-0.347513	-0.379728	-0.446376
-0.399728	-0.0414476	-0.399728	-0.0734785	-0.399728	-0.0982646	-0.399728	-0.108307	-0.399728	-0.118235	-0.399728	-0.129998	-0.399728	-0.141075	-0.399728	-0.150993	-0.399728	-0.160492	-0.399728	-0.169447	-0.399728	-0.101579	-0.399728	-0.220297	-0.399728	-0.290397	-0.399728	-0.307826	-0.399728	-0.339292	-0.399728	-0.367969	-0.399728	-0.397848	-0.399728	-0.4257	-0.399728	-0.476183	-0.399728	-0.484323	-0.399728	-0.131119	-0.399728	-0.253142	-0.399728	-0.321564	-0.399728	-0.391373	-0.399728	-0.488839
-0.419728	-0.0513062	-0.419728	-0.088847	-0.419728	-0.111769	-0.419728	-0.132616	-0.419728	-0.145324	-0.419728	-0.160173	-0.419728	-0.174344	-0.419728	-0.187042	-0.419728	-0.199502	-0.419728	-0.211209	-0.419728	-0.130971	-0.419728	-0.266055	-0.419728	-0.359081	-0.419728	-0.375575	-0.419728	-0.417017	-0.419728	-0.451946	-0.419728	-0.49695	-0.419728	-0.526886	-0.419728	-0.578074	-0.419728	-0.604563	-0.419728	-0.138772	-0.419728	-0.280102	-0.419728	-0.360092	-0.419728	-0.433077	-0.419728	-0.547452
-0.439728	-0.0645425	-0.439728	-0.109256	-0.439728	-0.139497	-0.439728	-0.165733	-0.439728	-0.182951	-0.439728	-0.200036	-0.439728	-0.217908	-0.439728	-0.233944	-0.439728	-0.249532	-0.439728	-0.264224	-0.439728	-0.172284	-0.439728	-0.32987	-0.439728	-0.470123	-0.439728	-0.471568	-0.439728	-0.524096	-0.439728	-0.567312	-0.439728	-0.625	-0.439728	-0.661113	-0.439728	-0.712564	-0.439728	-0.77236	-0.439728	-0.181049	-0.439728	-0.319427	-0.439728	-0.415978	-0.439728	-0.509333	-0.439728	-0.626018
-0.459728	-0.0818518	-0.459728	-0.139263	-0.459728	-0.178784	-0.459728	-0.208705	-0.459728	-0.228823	-0.459728	-0.250433	-0.459728	-0.272125	-0.459728	-0.291551	-0.459728	-0.310458	-0.459728	-0.327696	-0.459728	-0.228179	-0.459728	-0.425247	-0.459728	-0.534448	-0.459728	-0.601067	-0.459728	-0.667312	-0.459728	-0.714663	-0.459728	-0.771072	-0.459728	-0.827292	-0.459728	-0.89567	-0.459728	-0.968627	-0.459728	-0.20449	-0.459728	-0.37763	-0.459728	-0.492568	-0.459728	-0.592592	-0.459728	-0.727299
-0.479729	-0.107787	-0.479729	-0.181101	-0.479729	-0.228938	-0.479729	-0.266331	-0.479729	-0.287346	-0.479729	-0.312198	-0.479729	-0.337252	-0.479729	-0.359987	-0.479729	-0.38093	-0.479729	-0.400285	-0.479729	-0.312651	-0.479729	-0.561175	-0.479729	-0.688437	-0.479729	-0.768164	-0.479729	-0.840977	-0.479729	-0.895623	-0.479729	-0.958327	-0.479729	-1.02528	-0.479729	-1.08798	-0.479729	-1.2079	-0.479729	-0.249814	-0.479729	-0.460719	-0.479729	-0.596847	-0.479729	-0.704554	-0.479729	-0.854376
-0.49965	-0.144523	-0.49965	-0.23732	-0.49965	-0.294527	-0.49965	-0.335234	-0.49965	-0.360073	-0.49965	-0.387153	-0.49965	-0.415219	-0.49965	-0.442619	-0.49965	-0.462489	-0.49965	-0.483689	-0.49965	-0.436243	-0.49965	-0.781086	-0.49965	-0.89219	-0.49965	-0.981454	-0.49965	-1.04182	-0.49965	-1.11473	-0.49965	-1.18111	-0.49965	-1.25292	-0.49965	-1.31743	-0.49965	-1.42849	-0.49965	-0.318064	-0.49965	-0.584373	-0.49965	-0.735405	-0.49965	-0.853232	-0.49965	-1.00944
-0.51965	-0.195568	-0.51965	-0.310715	-0.51965	-0.377797	-0.51965	-0.422496	-0.51965	-0.448126	-0.51965	-0.476303	-0.51965	-0.505914	-0.51965	-0.53152	-0.51965	-0.554995	-0.51965	-0.576443	-0.51965	-0.603833	-0.51965	-1.1154	-0.51965	-1.14921	-0.51965	-1.21921	-0.51965	-1.2966	-0.51965	-1.37094	-0.51965	-1.43545	-0.51965	-1.50121	-0.51965	-1.57087	-0.51965	-1.63606	-0.51965	-0.419249	-0.51965	-0.726488	-0.51965	-0.90783	-0.51965	-1.03357	-0.51965	-1.19246
-0.539651	-0.263623	-0.539651	-0.403928	-0.539651	-0.481157	-0.539651	-0.527033	-0.539651	-0.552449	-0.539651	-0.580211	-0.539651	-0.610855	-0.539651	-0.636365	-0.539651	-0.659397	-0.539651	-0.680616	-0.539651	-0.81909	-0.539651	-1.31104	-0.539651	-1.48581	-0.539651	-1.50221	-0.539651	-1.60206	-0.539651	-1.66042	-0.539651	-1.72017	-0.539651	-1.78073	-0.539651	-1.84696	-0.539651	-1.90814	-0.539651	-0.550999	-0.539651	-0.923708	-0.539651	-1.11292	-0.539651	-1.24338	-0.539651	-1.40269
-0.55965	-0.350984	-0.55965	-0.514965	-0.55965	-0.599089	-0.55965	-0.648096	-0.55965	-0.672987	-0.55965	-0.69845	-0.55965	-0.728062	-0.55965	-0.752666	-0.55965	-0.774601	-0.55965	-0.794437	-0.55965	-1.07334	-0.55965	-1.4788	-0.55965	-1.74988	-0.55965	-1.82689	-0.55965	-1.92736	-0.55965	-1.97171	-0.55965	-2.02707	-0.55965	-2.07899	-0.55965	-2.13822	-0.55965	-2.19386	-0.55965	-0.714329	-0.55965	-1.14296	-0.55965	-1.34285	-0.55965	-1.47417	-0.55965	-1.63181
-0.579651	-0.460247	-0.579651	-0.64409	-0.579651	-0.73488	-0.579651	-0.784901	-0.579651	-0.80612	-0.579651	-0.830344	-0.579651	-0.859097	-0.579651	-0.882128	-0.579651	-0.902251	-0.579651	-0.920132	-0.579651	-1.36092	-0.579651	-1.79899	-0.579651	-2.046	-0.579651	-2.17083	-0.579651	-2.24841	-0.579651	-2.30144	-0.579651	-2.35074	-0.579651	-2.3929	-0.579651	-2.44559	-0.579651	-2.49446	-0.579651	-0.909689	-0.579651	-1.36397	-0.579651	-1.5889	-0.579651	-1.72017	-0.579651	-1.8741
-0.59965	-0.591116	-0.59965	-0.789145	-0.59965	-0.882605	-0.59965	-0.933197	-0.59965	-0.953177	-0.59965	-0.974826	-0.59965	-1.0021	-0.59965	-1.02332	-0.59965	-1.04187	-0.59965	-1.05741	-0.59965	-1.67382	-0.59965	-2.14055	-0.59965	-2.39366	-0.59965	-2.51835	-0.59965	-2.59112	-0.59965	-2.64047	-0.59965	-2.68305	-0.59965	-2.71758	-0.59965	-2.76259	-0.59965	-2.80393	-0.59965	-1.13633	-0.59965	-1.61656	-0.59965	-1.84334	-0.59965	-1.97314	-0.59965	-2.12401
-0.579651	-0.535991	-0.579651	-0.706461	-0.579651	-0.785902	-0.579651	-0.825861	-0.579651	-0.837258	-0.579651	-0.851325	-0.579651	-0.870112	-0.579651	-0.883893	-0.579651	-0.895003	-0.579651	-0.904063	-0.579651	-1.50402	-0.579651	-1.91763	-0.579651	-2.13731	-0.579651	-2.23974	-0.579651	-2.29338	-0.579651	-2.32452	-0.579651	-2.34989	-0.579651	-2.36653	-0.579651	-2.39204	-0.579651	-2.41745	-0.579651	-1.03233	-0.579651	-1.46225	-0.579651	-1.65642	-0.579651	-1.76051	-0.579651	-1.88564
-0.55965	-0.478961	-0.55965	-0.630214	-0.55965	-0.698021	-0.55965	-0.731543	-0.55965	-0.738695	-0.55965	-0.749138	-0.55965	-0.762918	-0.55965	-0.772932	-0.55965	-0.779799	-0.55965	-0.785759	-0.55965	-1.34237	-0.55965	-1.7134	-0.55965	-1.90681	-0.55965	-1.99426	-0.55965	-2.03689	-0.55965	-2.05973	-0.55965	-2.07585	-0.55965	-2.08376	-0.55965	-2.10136	-0.55965	-2.11705	-0.55965	-0.92924	-0.55965	-1.31581	-0.55965	-1.48638	-0.55965	-1.5744	-0.55965	-1.68207
-0.539651	-0.418164	-0.539651	-0.550487	-0.539651	-0.610807	-0.539651	-0.639322	-0.539651	-0.644519	-0.539651	-0.652626	-0.539651	-0.664022	-0.539651	-0.671842	-0.539651	-0.676706	-0.539651	-0.68114	-0.539651	-1.17825	-0.539651	-1.50917	-0.539651	-1.6785	-0.539651	-1.75312	-0.539651	-1.78946	-0.539651	-1.80696	-0.539651	-1.81998	-0.539651	-1.82503	-0.539651	-1.83724	-0.539651	-1.84925	-0.539651	-0.821761	-0.539651	-1.16833	-0.539651	-1.31691	-0.539651	-1.39192	-0.539651	-1.48652
-0.51965	-0.355793	-0.51965	-0.468757	-0.51965	-0.52097	-0.51965	-0.546195	-0.51965	-0.550439	-0.51965	-0.557496	-0.51965	-0.567987	-0.51965	-0.573709	-0.51965	-0.578001	-0.51965	-0.581625	-0.51965	-1.0094	-0.51965	-1.29765	-0.51965	-1.44284	-0.51965	-1.50841	-0.51965	-1.54031	-0.51965	-1.55628	-0.51965	-1.56763	-0.51965	-1.57169	-0.51965	-1.58246	-0.51965	-1.59286	-0.51965	-0.709131	-0.51965	-1.01402	-0.51965	-1.14148	-0.51965	-1.20714	-0.51965	-1.29178
-0.49965	-0.293518	-0.49965	-0.386836	-0.49965	-0.431468	-0.49965	-0.453593	-0.49965	-0.457313	-0.49965	-0.464131	-0.49965	-0.472714	-0.49965	-0.479819	-0.49965	-0.483062	-0.49965	-0.48702	-0.49965	-0.840405	-0.49965	-1.08364	-0.49965	-1.20714	-0.49965	-1.26274	-0.49965	-1.29078	-0.49965	-1.30656	-0.49965	-1.31739	-0.49965	-1.32297	-0.49965	-1.33379	-0.49965	-1.34476	-0.49965	-0.594022	-0.49965	-0.858239	-0.49965	-0.964955	-0.49965	-1.0227	-0.49965	-1.09814
-0.479729	-0.232292	-0.479729	-0.307299	-0.479729	-0.344349	-0.479729	-0.362898	-0.479729	-0.366522	-0.479729	-0.373007	-0.479729	-0.380923	-0.479729	-0.389124	-0.479729	-0.391127	-0.479729	-0.395133	-0.479729	-0.674465	-0.479729	-0.873736	-0.479729	-0.973348	-0.479729	-1.01941	-0.479729	-1.04463	-0.479729	-1.0598	-0.479729	-1.07105	-0.479729	-1.0783	-0.479729	-1.09027	-0.479729	-1.10171	-0.479729	-0.480725	-0.479729	-0.703075	-0.479729	-0.790146	-0.479729	-0.839499	-0.479729	-0.906781
-0.459728	-0.177694	-0.459728	-0.234009	-0.459728	-0.263525	-0.459728	-0.278545	-0.459728	-0.281645	-0.459728	-0.28751	-0.459728	-0.294519	-0.459728	-0.300194	-0.459728	-0.304533	-0.459728	-0.308729	-0.459728	-0.520017	-0.459728	-0.674179	-0.459728	-0.751617	-0.459728	-0.788334	-0.459728	-0.809839	-0.459728	-0.82343	-0.459728	-0.834874	-0.459728	-0.843886	-0.459728	-0.856331	-0.459728	-0.868348	-0.459728	-0.37563	-0.459728	-0.556638	-0.459728	-0.624635	-0.459728	-0.665739	-0.459728	-0.723341
-0.439728	-0.129915	-0.439728	-0.169635	-0.439728	-0.19138	-0.439728	-0.205065	-0.439728	-0.204636	-0.439728	-0.209499	-0.439728	-0.215221	-0.439728	-0.21999	-0.439728	-0.224043	-0.439728	-0.228239	-0.439728	-0.381543	-0.439728	-0.494315	-0.439728	-0.548532	-0.439728	-0.574424	-0.439728	-0.590637	-0.439728	-0.602319	-0.439728	-0.612953	-0.439728	-0.622156	-0.439728	-0.63422	-0.439728	-0.646331	-0.439728	-0.28236	-0.439728	-0.42441	-0.439728	-0.47281	-0.439728	-0.504567	-0.439728	-0.551822
-0.419728	-0.0914817	-0.419728	-0.116659	-0.419728	-0.130773	-0.419728	-0.138116	-0.419728	-0.138164	-0.419728	-0.141311	-0.419728	-0.14546	-0.419728	-0.148893	-0.419728	-0.152374	-0.419728	-0.155998	-0.419728	-0.265623	-0.419728	-0.340106	-0.419728	-0.371815	-0.419728	-0.386263	-0.419728	-0.395609	-0.419728	-0.403811	-0.419728	-0.41187	-0.419728	-0.420119	-0.419728	-0.430371	-0.419728	-0.441434	-0.419728	-0.204636	-0.419728	-0.311733	-0.419728	-0.341155	-0.419728	-0.362422	-0.419728	-0.397278
-0.399728	-0.0623465	-0.399728	-0.0752692	-0.399728	-0.0829463	-0.399728	-0.0856166	-0.399728	-0.0834708	-0.399728	-0.0847106	-0.399728	-0.0866179	-0.399728	-0.088573	-0.399728	-0.0909095	-0.399728	-0.0935321	-0.399728	-0.174356	-0.399728	-0.214888	-0.399728	-0.226618	-0.399728	-0.228477	-0.399728	-0.230099	-0.399728	-0.232626	-0.399728	-0.23687	-0.399728	-0.242353	-0.399728	-0.250031	-0.399728	-0.2589	-0.399728	-0.14422	-0.399728	-0.221134	-0.399728	-0.232626	-0.399728	-0.242735	-0.399728	-0.26424
-0.379728	-0.0407244	-0.379728	-0.0447035	-0.379728	-0.0464201	-0.379728	-0.045085	-0.379728	-0.0403643	-0.379728	-0.0392199	-0.379728	-0.0389338	-0.379728	-0.0390291	-0.379728	-0.0398874	-0.379728	-0.0416994	-0.379728	-0.105691	-0.379728	-0.118852	-0.379728	-0.110984	-0.379728	-0.100637	-0.379728	-0.0934844	-0.379728	-0.0892882	-0.379728	-0.0882392	-0.379728	-0.0899081	-0.379728	-0.0939136	-0.379728	-0.100065	-0.379728	-0.0988727	-0.379728	-0.150896	-0.379728	-0.14627	-0.379728	-0.145126	-0.379728	-0.151515
-0.359728	-0.026281	-0.359728	-0.0232626	-0.359728	-0.0203371	-0.359728	-0.0153303	-0.359728	-0.00827312	-0.359728	-0.00503063	-0.359728	-0.00269413	-0.359728	-0.0010252	-0.359728	-0.000119209	-0.359728	-0.000166893	-0.359728	-0.0566244	-0.359728	-0.047946	-0.359728	-0.0251055	-0.359728	-0.0033617	-0.359728	0.0122786	-0.359728	0.022769	-0.359728	0.0294924	-0.359728	0.0323534	-0.359728	0.032115	-0.359728	0.0294447	-0.359728	-0.0664477	-0.359728	-0.0992541	-0.359728	-0.0817065	-0.359728	-0.0696902	-0.359728	-0.0617266
-0.339806	-0.0156951	-0.339806	-0.00877624	-0.339806	-0.00237226	-0.339806	0.00544786	-0.339806	0.0143171	-0.339806	0.0193525	-0.339806	0.0234629	-0.339806	0.0266529	-0.339806	0.0290991	-0.339806	0.0306154	-0.339806	-0.022769	-0.339806	0.00169277	-0.339806	0.0362635	-0.339806	0.0669723	-0.339806	0.089622	-0.339806	0.106168	-0.339806	0.118137	-0.339806	0.125003	-0.339806	0.128913	-0.339806	0.129486	-0.339806	-0.0436544	-0.339806	-0.0625854	-0.339806	-0.0347853	-0.339806	-0.0140905	-0.339806	0.00703335
-0.319806	-0.00889068	-0.319806	0.000145435	-0.319806	0.00896697	-0.319806	0.0187183	-0.319806	0.0289608	-0.319806	0.0353076	-0.319806	0.04061	-0.319806	0.0450017	-0.319806	0.0486495	-0.319806	0.0513389	-0.319806	2.38419e-05	-0.319806	0.0344515	-0.319806	0.076509	-0.319806	0.112892	-0.319806	0.141216	-0.319806	0.162054	-0.319806	0.178075	-0.319806	0.188566	-0.319806	0.195623	-0.319806	0.199009	-0.319806	-0.0276447	-0.319806	-0.0375032	-0.319806	-0.00283718	-0.319806	0.0242949	-0.319806	0.0576258
-0.299806	-0.00456572	-0.299806	0.00600576	-0.299806	0.0153661	-0.299806	0.0262381	-0.299806	0.0370862	-0.299806	0.0440814	-0.299806	0.0501229	-0.299806	0.0551154	-0.299806	0.0595977	-0.299806	0.0632074	-0.299806	0.014813	-0.299806	0.0542666	-0.299806	0.0992183	-0.299806	0.138572	-0.299806	0.169628	-0.299806	0.19317	-0.299806	0.211747	-0.299806	0.224417	-0.299806	0.233294	-0.299806	0.239349	-0.299806	-0.0164295	-0.299806	-0.0207401	-0.299806	0.016892	-0.299806	0.0486018	-0.299806	0.0921969
-0.279806	-0.00138998	-0.279806	0.00898128	-0.279806	0.0184227	-0.279806	0.0295902	-0.279806	0.0405003	-0.279806	0.0475766	-0.279806	0.0538804	-0.279806	0.05914	-0.279806	0.0641038	-0.279806	0.068238	-0.279806	0.0240017	-0.279806	0.0640657	-0.279806	0.10916	-0.279806	0.148166	-0.279806	0.179651	-0.279806	0.204299	-0.279806	0.223878	-0.279806	0.237759	-0.279806	0.248421	-0.279806	0.255707	-0.279806	-0.00814681	-0.279806	-0.0104881	-0.279806	0.0278593	-0.279806	0.062454	-0.279806	0.114983
-0.259806	0.00027895	-0.259806	0.0105031	-0.259806	0.0191904	-0.259806	0.0299955	-0.259806	0.0403859	-0.259806	0.0473287	-0.259806	0.053375	-0.259806	0.0585296	-0.259806	0.0635984	-0.259806	0.067847	-0.259806	0.0292564	-0.259806	0.0671031	-0.259806	0.109098	-0.259806	0.145929	-0.259806	0.176442	-0.259806	0.199903	-0.259806	0.219415	-0.259806	0.233529	-0.259806	0.24444	-0.259806	0.252717	-0.259806	-0.00178099	-0.259806	-0.00329256	-0.259806	0.0328805	-0.259806	0.0686338	-0.259806	0.128968
-0.239805	0.00186754	-0.239805	0.0111411	-0.239805	0.0187915	-0.239805	0.028813	-0.239805	0.0383545	-0.239805	0.0446631	-0.239805	0.0503613	-0.239805	0.0549581	-0.239805	0.0600126	-0.239805	0.0641992	-0.239805	0.0321414	-0.239805	0.066283	-0.239805	0.104187	-0.239805	0.136679	-0.239805	0.164488	-0.239805	0.186165	-0.239805	0.204232	-0.239805	0.217927	-0.239805	0.228575	-0.239805	0.236953	-0.239805	0.00353575	-0.239805	0.00157595	-0.239805	0.0343253	-0.239805	0.0707129	-0.239805	0.138386
-0.219806	0.003011	-0.219806	0.0114787	-0.219806	0.0178922	-0.219806	0.0268055	-0.219806	0.0353791	-0.219806	0.0409152	-0.219806	0.0460078	-0.219806	0.0505998	-0.219806	0.0547912	-0.219806	0.0587251	-0.219806	0.0335862	-0.219806	0.0633981	-0.219806	0.0959043	-0.219806	0.123957	-0.219806	0.148256	-0.219806	0.167444	-0.219806	0.183337	-0.219806	0.195969	-0.219806	0.205997	-0.219806	0.214055	-0.219806	0.00755553	-0.219806	0.00499964	-0.219806	0.0342204	-0.219806	0.0701168	-0.219806	0.14704
-0.199883	0.0041063	-0.199883	0.011731	-0.199883	0.0169213	-0.199883	0.0246407	-0.199883	0.0321747	-0.199883	0.0369956	-0.199883	0.0413252	-0.199883	0.0452687	-0.199883	0.0491311	-0.199883	0.0525977	-0.199883	0.0338818	-0.199883	0.0597885	-0.199883	0.0878361	-0.199883	0.110467	-0.199883	0.13109	-0.199883	0.147451	-0.199883	0.161341	-0.199883	0.172303	-0.199883	0.181382	-0.199883	0.188807	-0.199883	0.0100172	-0.199883	0.00809505	-0.199883	0.0339009	-0.199883	0.0680664	-0.199883	0.156153
-0.179883	0.00527646	-0.179883	0.0121701	-0.179883	0.015909	-0.179883	0.0229908	-0.179883	0.0293995	-0.179883	0.033529	-0.179883	0.0372483	-0.179883	0.0406815	-0.179883	0.0439288	-0.179883	0.0468661	-0.179883	0.0339676	-0.179883	0.0567415	-0.179883	0.0801495	-0.179883	0.0987271	-0.179883	0.115836	-0.179883	0.129297	-0.179883	0.141213	-0.179883	0.150397	-0.179883	0.158318	-0.179883	0.165113	-0.179883	0.0123718	-0.179883	0.0113261	-0.179883	0.0344302	-0.179883	0.0681617	-0.179883	0.164993
-0.159883	0.00622823	-0.159883	0.0128363	-0.159883	0.0161274	-0.159883	0.021937	-0.159883	0.0273157	-0.159883	0.0307728	-0.159883	0.0339438	-0.159883	0.0368525	-0.159883	0.0396229	-0.159883	0.0421835	-0.159883	0.0337578	-0.159883	0.0544383	-0.159883	0.074251	-0.159883	0.0892857	-0.159883	0.103505	-0.159883	0.114301	-0.159883	0.124267	-0.159883	0.131763	-0.159883	0.138524	-0.159883	0.144475	-0.159883	0.0148366	-0.159883	0.0148581	-0.159883	0.0360371	-0.159883	0.0696877	-0.159883	0.171102
-0.139883	0.00733068	-0.139883	0.0138481	-0.139883	0.0167497	-0.139883	0.0217033	-0.139883	0.0262619	-0.139883	0.0291372	-0.139883	0.0318123	-0.139883	0.0342156	-0.139883	0.0366141	-0.139883	0.0387026	-0.139883	0.0338007	-0.139883	0.0533893	-0.139883	0.0705841	-0.139883	0.0828246	-0.139883	0.094593	-0.139883	0.103739	-0.139883	0.111607	-0.139883	0.117848	-0.139883	0.124209	-0.139883	0.128901	-0.139883	0.0174874	-0.139883	0.0191286	-0.139883	0.0390984	-0.139883	0.0728825	-0.139883	0.178235
-0.119884	0.00839022	-0.119884	0.0152128	-0.119884	0.0174545	-0.119884	0.0220419	-0.119884	0.0259615	-0.119884	0.0284267	-0.119884	0.0307251	-0.119884	0.0327755	-0.119884	0.0347449	-0.119884	0.0364758	-0.119884	0.0339915	-0.119884	0.0531318	-0.119884	0.0683811	-0.119884	0.0790766	-0.119884	0.0889901	-0.119884	0.0965575	-0.119884	0.103701	-0.119884	0.108417	-0.119884	0.113838	-0.119884	0.118139	-0.119884	0.0201143	-0.119884	0.0236863	-0.119884	0.0421883	-0.119884	0.0773457	-0.119884	0.188058
-0.0998831	0.00821045	-0.0998831	0.0160726	-0.0998831	0.0189622	-0.0998831	0.0230997	-0.0998831	0.0264526	-0.0998831	0.0285507	-0.0998831	0.030563	-0.0998831	0.0323226	-0.0998831	0.034001	-0.0998831	0.0354983	-0.0998831	0.0344826	-0.0998831	0.0537946	-0.0998831	0.0687196	-0.0998831	0.0770119	-0.0998831	0.0863961	-0.0998831	0.092943	-0.0998831	0.0986794	-0.0998831	0.10259	-0.0998831	0.107625	-0.0998831	0.111478	-0.0998831	0.0227965	-0.0998831	0.0282529	-0.0998831	0.0457551	-0.0998831	0.0837115	-0.0998831	0.200589
-0.0798826	0.00930909	-0.0798826	0.016784	-0.0798826	0.0196031	-0.0798826	0.0240363	-0.0798826	0.0272394	-0.0798826	0.0292183	-0.0798826	0.0309397	-0.0798826	0.0326087	-0.0798826	0.0340153	-0.0798826	0.0353314	-0.0798826	0.0350167	-0.0798826	0.0551774	-0.0798826	0.0687864	-0.0798826	0.0770691	-0.0798826	0.0858572	-0.0798826	0.0916556	-0.0798826	0.0968245	-0.0798826	0.100124	-0.0798826	0.104945	-0.0798826	0.108183	-0.0798826	0.0254935	-0.0798826	0.0327929	-0.0798826	0.0500371	-0.0798826	0.0914601	-0.0798826	0.215009
-0.0599613	0.00967912	-0.0599613	0.0175851	-0.0599613	0.0208834	-0.0599613	0.0250371	-0.0599613	0.0282455	-0.0599613	0.0301386	-0.0599613	0.0317503	-0.0599613	0.0333334	-0.0599613	0.03464	-0.0599613	0.0357701	-0.0599613	0.0355889	-0.0599613	0.0574901	-0.0599613	0.0701216	-0.0599613	0.0780991	-0.0599613	0.0867585	-0.0599613	0.0921849	-0.0599613	0.0967816	-0.0599613	0.0998715	-0.0599613	0.104216	-0.0599613	0.107463	-0.0599613	0.0279978	-0.0599613	0.0369581	-0.0599613	0.0546433	-0.0599613	0.0998763	-0.0599613	0.230282
-0.0399609	0.0101622	-0.0399609	0.0185316	-0.0399609	0.0219572	-0.0399609	0.0259803	-0.0399609	0.0291563	-0.0399609	0.0311352	-0.0399609	0.0327469	-0.0399609	0.0341393	-0.0399609	0.0354411	-0.0399609	0.0365616	-0.0399609	0.0365187	-0.0399609	0.0605752	-0.0399609	0.0719288	-0.0399609	0.0798538	-0.0399609	0.0878457	-0.0399609	0.0936535	-0.0399609	0.098236	-0.0399609	0.101054	-0.0399609	0.105193	-0.0399609	0.108345	-0.0399609	0.0303849	-0.0399609	0.0410613	-0.0399609	0.0596883	-0.0399609	0.10916	-0.0399609	0.246571
-0.0199614	0.0105174	-0.0199614	0.0194348	-0.0199614	0.0230878	-0.0199614	0.0270203	-0.0199614	0.0300385	-0.0199614	0.0319983	-0.0199614	0.03361	-0.0199614	0.0351168	-0.0199614	0.0363709	-0.0199614	0.0374438	-0.0199614	0.0372435	-0.0199614	0.0614479	-0.0199614	0.07386	-0.0199614	0.0816611	-0.0199614	0.0903061	-0.0199614	0.0957755	-0.0199614	0.100315	-0.0199614	0.1032	-0.0199614	0.10712	-0.0199614	0.110214	-0.0199614	0.0326771	-0.0199614	0.0448298	-0.0199614	0.064781	-0.0199614	0.118745	-0.0199614	0.262774
3.91006e-05	0.0109265	3.91006e-05	0.0201782	3.91006e-05	0.0240634	3.91006e-05	0.0280794	3.91006e-05	0.0310732	3.91006e-05	0.033076	3.91006e-05	0.0346686	3.91006e-05	0.0361706	3.91006e-05	0.0374629	3.91006e-05	0.0385071	3.91006e-05	0.038078	3.91006e-05	0.0625255	3.91006e-05	0.0756672	3.91006e-05	0.0834588	3.91006e-05	0.0919083	3.91006e-05	0.0981692	3.91006e-05	0.102556	3.91006e-05	0.105722	3.91006e-05	0.109494	3.91006e-05	0.112794	3.91006e-05	0.0347833	3.91006e-05	0.0487818	3.91006e-05	0.0699499	3.91006e-05	0.128506	3.91006e-05	0.278944
0.0200396	0.011319	0.0200396	0.0207871	0.0200396	0.0250329	0.0200396	0.0290059	0.0200396	0.0320269	0.0200396	0.0339963	0.0200396	0.035751	0.0200396	0.0372292	0.0200396	0.038612	0.0200396	0.039704	0.0200396	0.0390603	0.0200396	0.0622108	0.0200396	0.0772408	0.0200396	0.085409	0.0200396	0.0940589	0.0200396	0.100396	0.0200396	0.104936	0.0200396	0.108188	0.0200396	0.112021	0.0200396	0.115364	0.0200396	0.0376967	0.0200396	0.0536556	0.0200396	0.0756767	0.0200396	0.138777	0.0200396	0.295209
0.0400391	0.0117692	0.0400391	0.0216115	0.0400391	0.0262369	0.0400391	0.0313391	0.0400391	0.032952	0.0400391	0.0349118	0.0400391	0.0367619	0.0400391	0.0382878	0.0400391	0.0397612	0.0400391	0.0409104	0.0400391	0.0401236	0.0400391	0.0634744	0.0400391	0.0786665	0.0400391	0.0871495	0.0400391	0.0959758	0.0400391	0.102394	0.0400391	0.106867	0.0400391	0.110624	0.0400391	0.114601	0.0400391	0.117968	0.0400391	0.0440921	0.0400391	0.0646951	0.0400391	0.0842122	0.0400391	0.153597	0.0400391	0.318021
0.0600395	0.0123919	0.0600395	0.0219739	0.0600395	0.0266102	0.0600395	0.0306333	0.0600395	0.034969	0.0600395	0.0357653	0.0600395	0.0376441	0.0600395	0.0391747	0.0600395	0.0407435	0.0600395	0.0418736	0.0600395	0.0412489	0.0600395	0.064204	0.0600395	0.0799969	0.0600395	0.0886134	0.0600395	0.0977782	0.0600395	0.107897	0.0600395	0.109022	0.0600395	0.113371	0.0600395	0.117243	0.0600395	0.120624	0.0600395	0.0445828	0.0600395	0.0630977	0.0600395	0.0894097	0.0600395	0.160096	0.0600395	0.324892
0.0799608	0.0124395	0.0799608	0.0224851	0.0799608	0.0272606	0.0799608	0.0312461	0.0799608	0.0341631	0.0799608	0.0363661	0.0799608	0.0384261	0.0799608	0.0401427	0.0799608	0.0416018	0.0799608	0.0429036	0.0799608	0.0423552	0.0799608	0.0651052	0.0799608	0.0809553	0.0799608	0.0898865	0.0799608	0.0992755	0.0799608	0.106147	0.0799608	0.110882	0.0799608	0.115588	0.0799608	0.119751	0.0799608	0.123218	0.0799608	0.0449895	0.0799608	0.0660303	0.0799608	0.0939158	0.0799608	0.169109	0.0799608	0.336846
0.0999613	0.0124152	0.0999613	0.0229271	0.0999613	0.0278905	0.0999613	0.0317487	0.0999613	0.0347878	0.0999613	0.0370432	0.0999613	0.0392319	0.0999613	0.0409533	0.0999613	0.0425459	0.0999613	0.0439002	0.0999613	0.0435521	0.0999613	0.0660541	0.0999613	0.0819281	0.0999613	0.0912598	0.0999613	0.100854	0.0999613	0.107859	0.0999613	0.112813	0.0999613	0.11782	0.0999613	0.122083	0.0999613	0.125821	0.0999613	0.0458183	0.0999613	0.0692061	0.0999613	0.0991897	0.0999613	0.178202	0.0999613	0.348772
0.119962	0.0126269	0.119962	0.0231951	0.119962	0.0283769	0.119962	0.0322121	0.119962	0.0352551	0.119962	0.0376584	0.119962	0.039909	0.119962	0.0417258	0.119962	0.0433947	0.119962	0.0448205	0.119962	0.0446345	0.119962	0.0668027	0.119962	0.0826863	0.119962	0.0922373	0.119962	0.101908	0.119962	0.109265	0.119962	0.114887	0.119962	0.119789	0.119962	0.124257	0.119962	0.128482	0.119962	0.0466508	0.119962	0.0725964	0.119962	0.101765	0.119962	0.187505	0.119962	0.358948
0.139961	0.0128844	0.139961	0.0236872	0.139961	0.0287427	0.139961	0.032648	0.139961	0.0357987	0.139961	0.03814	0.139961	0.0405337	0.139961	0.0424315	0.139961	0.0441911	0.139961	0.0456645	0.139961	0.0459125	0.139961	0.0676277	0.139961	0.0832156	0.139961	0.0930003	0.139961	0.102895	0.139961	0.11061	0.139961	0.116108	0.139961	0.121687	0.139961	0.126431	0.139961	0.130671	0.139961	0.048057	0.139961	0.0762919	0.139961	0.106419	0.139961	0.196789	0.139961	0.36764
0.159962	0.0130799	0.159962	0.0239681	0.159962	0.0290564	0.159962	0.0331091	0.159962	0.0361659	0.159962	0.0386311	0.159962	0.0411393	0.159962	0.0430752	0.159962	0.0449254	0.159962	0.0465323	0.159962	0.0473239	0.159962	0.0684335	0.159962	0.0837449	0.159962	0.0937919	0.159962	0.103858	0.159962	0.111659	0.159962	0.117882	0.159962	0.123361	0.159962	0.128458	0.159962	0.133012	0.159962	0.0499506	0.159962	0.0798252	0.159962	0.111564	0.159962	0.205816	0.159962	0.375055
0.179961	0.013274	0.179961	0.0242461	0.179961	0.0293168	0.179961	0.0332855	0.179961	0.0364663	0.179961	0.0390364	0.179961	0.0415446	0.179961	0.0435807	0.179961	0.0455548	0.179961	0.0471713	0.179961	0.0488784	0.179961	0.0691107	0.179961	0.0842598	0.179961	0.0943212	0.179961	0.104688	0.179961	0.113028	0.179961	0.118955	0.179961	0.124896	0.179961	0.130327	0.179961	0.135043	0.179961	0.0508079	0.179961	0.0834254	0.179961	0.11658	0.179961	0.214618	0.179961	0.380544
0.199962	0.0136793	0.199962	0.0244425	0.199962	0.0295838	0.199962	0.0335139	0.199962	0.0367428	0.199962	0.0394131	0.199962	0.0420167	0.199962	0.0441386	0.199962	0.0461175	0.199962	0.0479104	0.199962	0.0496652	0.199962	0.0700262	0.199962	0.0851658	0.199962	0.0950173	0.199962	0.105136	0.199962	0.113633	0.199962	0.12009	0.199962	0.126479	0.199962	0.131996	0.199962	0.137075	0.199962	0.0522639	0.199962	0.0870255	0.199962	0.121534	0.199962	0.223049	0.199962	0.384864
0.219884	0.0140884	0.219884	0.0245608	0.219884	0.0297526	0.219884	0.0337967	0.219884	0.0369431	0.219884	0.0396611	0.219884	0.04236	0.219884	0.0445439	0.219884	0.0466039	0.219884	0.0484826	0.219884	0.0512769	0.219884	0.070751	0.219884	0.0853804	0.219884	0.0953845	0.219884	0.105884	0.219884	0.114291	0.219884	0.121062	0.219884	0.127481	0.219884	0.133379	0.219884	0.138681	0.219884	0.0538756	0.219884	0.0904015	0.219884	0.125268	0.219884	0.230602	0.219884	0.387692
0.239883	0.0145619	0.239883	0.0248731	0.239883	0.0299305	0.239883	0.0338191	0.239883	0.0371911	0.239883	0.040033	0.239883	0.0427081	0.239883	0.045016	0.239883	0.0471618	0.239883	0.0490691	0.239883	0.0531508	0.239883	0.0719526	0.239883	0.0861338	0.239883	0.0961331	0.239883	0.106476	0.239883	0.115111	0.239883	0.121973	0.239883	0.128596	0.239883	0.134776	0.239883	0.140303	0.239883	0.0560596	0.239883	0.0937489	0.239883	0.130132	0.239883	0.238465	0.239883	0.389294
0.259884	0.0152882	0.259884	0.0252169	0.259884	0.0301856	0.259884	0.0340408	0.259884	0.0375105	0.259884	0.040343	0.259884	0.0430895	0.259884	0.0455119	0.259884	0.0477387	0.259884	0.0496318	0.259884	0.057986	0.259884	0.0734308	0.259884	0.0871733	0.259884	0.0973252	0.259884	0.107406	0.259884	0.116796	0.259884	0.122936	0.259884	0.129827	0.259884	0.136102	0.259884	0.1418	0.259884	0.057266	0.259884	0.0972823	0.259884	0.134919	0.259884	0.245913	0.259884	0.390085
0.279884	0.0161513	0.279884	0.0255784	0.279884	0.0305327	0.279884	0.0343193	0.279884	0.0378157	0.279884	0.0406672	0.279884	0.0435664	0.279884	0.0459887	0.279884	0.048268	0.279884	0.0502135	0.279884	0.0612762	0.279884	0.0751904	0.279884	0.0882891	0.279884	0.0980882	0.279884	0.108269	0.279884	0.118664	0.279884	0.123842	0.279884	0.130828	0.279884	0.137017	0.279884	0.142987	0.279884	0.0591638	0.279884	0.101006	0.279884	0.139411	0.279884	0.253051	0.279884	0.389508
0.299884	0.0173643	0.299884	0.0261024	0.299884	0.0309013	0.299884	0.0347089	0.299884	0.0381733	0.299884	0.0411345	0.299884	0.0440719	0.299884	0.0464704	0.299884	0.0487878	0.299884	0.050843	0.299884	0.0650051	0.299884	0.0771406	0.299884	0.0898722	0.299884	0.099471	0.299884	0.109504	0.299884	0.119117	0.299884	0.12523	0.299884	0.132082	0.299884	0.138472	0.299884	0.144446	0.299884	0.0613	0.299884	0.104168	0.299884	0.144113	0.299884	0.260013	0.299884	0.388002
0.319884	0.0190242	0.319884	0.0268205	0.319884	0.031423	0.319884	0.0351638	0.319884	0.0386311	0.319884	0.0415732	0.319884	0.0445106	0.319884	0.0469377	0.319884	0.0493314	0.319884	0.0512816	0.319884	0.0670507	0.319884	0.0809601	0.319884	0.0930956	0.319884	0.101188	0.319884	0.110939	0.319884	0.119389	0.319884	0.126293	0.319884	0.133188	0.319884	0.139545	0.319884	0.1455	0.319884	0.0632169	0.319884	0.105541	0.319884	0.148347	0.319884	0.266946	0.319884	0.386147
0.339884	0.0215457	0.339884	0.0276931	0.339884	0.0321306	0.339884	0.035776	0.339884	0.0392319	0.339884	0.0422122	0.339884	0.0451161	0.339884	0.0475623	0.339884	0.0499465	0.339884	0.0519492	0.339884	0.0729731	0.339884	0.0823906	0.339884	0.0963239	0.339884	0.104826	0.339884	0.112899	0.339884	0.121091	0.339884	0.128234	0.339884	0.135115	0.339884	0.141209	0.339884	0.147145	0.339884	0.0660684	0.339884	0.109756	0.339884	0.152181	0.339884	0.274395	0.339884	0.385031
0.359806	0.0250653	0.359806	0.0287508	0.359806	0.032926	0.359806	0.0364861	0.359806	0.0405051	0.359806	0.0429083	0.359806	0.0458409	0.359806	0.0483014	0.359806	0.0506141	0.359806	0.0526502	0.359806	0.0783423	0.359806	0.0853327	0.359806	0.100129	0.359806	0.106099	0.359806	0.115307	0.359806	0.123346	0.359806	0.130246	0.359806	0.136989	0.359806	0.143059	0.359806	0.148996	0.359806	0.0691202	0.359806	0.114334	0.359806	0.155871	0.359806	0.281437	0.359806	0.383929
0.379807	0.0292004	0.379807	0.0301222	0.379807	0.0340361	0.379807	0.0374407	0.379807	0.0408007	0.379807	0.0437333	0.379807	0.0466372	0.379807	0.0490787	0.379807	0.0513341	0.379807	0.0534226	0.379807	0.0859717	0.379807	0.0888184	0.379807	0.102322	0.379807	0.108788	0.379807	0.117901	0.379807	0.12666	0.379807	0.132649	0.379807	0.139158	0.379807	0.145262	0.379807	0.151046	0.379807	0.0728777	0.379807	0.119021	0.379807	0.161231	0.379807	0.287603	0.379807	0.382861
0.399806	0.0339621	0.399806	0.0317239	0.399806	0.0351814	0.399806	0.0385493	0.399806	0.0418545	0.399806	0.04483	0.399806	0.0476338	0.399806	0.050018	0.399806	0.0522973	0.399806	0.0543525	0.399806	0.0957707	0.399806	0.0924662	0.399806	0.105451	0.399806	0.112198	0.399806	0.121339	0.399806	0.129788	0.399806	0.135682	0.399806	0.142081	0.399806	0.148066	0.399806	0.153616	0.399806	0.0773981	0.399806	0.124023	0.399806	0.166443	0.399806	0.293964	0.399806	0.382585
0.419806	0.0388435	0.419806	0.0334448	0.419806	0.0365957	0.419806	0.0398068	0.419806	0.0430085	0.419806	0.0459697	0.419806	0.0487592	0.419806	0.0511481	0.419806	0.0533559	0.419806	0.05533	0.419806	0.10577	0.419806	0.0965528	0.419806	0.109437	0.419806	0.115765	0.419806	0.125607	0.419806	0.133389	0.419806	0.139115	0.419806	0.145429	0.419806	0.15117	0.419806	0.156787	0.419806	0.0826767	0.419806	0.128973	0.419806	0.171016	0.419806	0.300668	0.419806	0.382351
0.439806	0.0442528	0.439806	0.0352849	0.439806	0.0381865	0.439806	0.0412373	0.439806	0.044358	0.439806	0.0473716	0.439806	0.0500848	0.439806	0.0524737	0.439806	0.0547816	0.439806	0.0566366	0.439806	0.114425	0.439806	0.101555	0.439806	0.113051	0.439806	0.119937	0.439806	0.128801	0.439806	0.137194	0.439806	0.143302	0.439806	0.149525	0.439806	0.155314	0.439806	0.160711	0.439806	0.0892094	0.439806	0.133904	0.439806	0.177353	0.439806	0.307444	0.439806	0.382966
0.459806	0.0487203	0.459806	0.0374092	0.459806	0.0398659	0.459806	0.0428161	0.459806	0.045922	0.459806	0.0488641	0.459806	0.0515868	0.459806	0.0540139	0.459806	0.0562121	0.459806	0.0581052	0.459806	0.124743	0.459806	0.106843	0.459806	0.116508	0.459806	0.124085	0.459806	0.133055	0.459806	0.141142	0.459806	0.147665	0.459806	0.153964	0.459806	0.159825	0.459806	0.16527	0.459806	0.0958756	0.459806	0.13963	0.459806	0.183967	0.459806	0.313996	0.459806	0.383829
0.479807	0.0532641	0.479807	0.0395226	0.479807	0.0416092	0.479807	0.0445766	0.479807	0.0476434	0.479807	0.0505807	0.479807	0.0533559	0.479807	0.0556542	0.479807	0.0579002	0.479807	0.0597551	0.479807	0.134152	0.479807	0.111216	0.479807	0.120066	0.479807	0.128592	0.479807	0.137637	0.479807	0.145887	0.479807	0.152772	0.479807	0.158981	0.479807	0.16486	0.479807	0.170353	0.479807	0.10319	0.479807	0.145314	0.479807	0.192312	0.479807	0.320557	0.479807	0.385365
0.499728	0.0575044	0.499728	0.0416927	0.499728	0.0434608	0.499728	0.0463056	0.499728	0.0495173	0.499728	0.052531	0.499728	0.0551726	0.499728	0.0575664	0.499728	0.0597932	0.499728	0.0616243	0.499728	0.142835	0.499728	0.118926	0.499728	0.125769	0.499728	0.133441	0.499728	0.142572	0.499728	0.151408	0.499728	0.158051	0.499728	0.164498	0.499728	0.170544	0.499728	0.176085	0.499728	0.110429	0.499728	0.151156	0.499728	0.198696	0.499728	0.327243	0.499728	0.387673
0.519729	0.060313	0.519729	0.0438256	0.519729	0.0453185	0.519729	0.0480828	0.519729	0.051172	0.519729	0.0543572	0.519729	0.056999	0.519729	0.0594213	0.519729	0.0616767	0.519729	0.0635841	0.519729	0.150173	0.519729	0.121906	0.519729	0.12975	0.519729	0.138071	0.519729	0.147436	0.519729	0.156301	0.519729	0.163444	0.519729	0.170291	0.519729	0.176233	0.519729	0.181964	0.519729	0.117305	0.519729	0.156596	0.519729	0.205129	0.519729	0.333728	0.519729	0.390166
0.539729	0.0644615	0.539729	0.0458702	0.539729	0.0471939	0.539729	0.0500502	0.539729	0.0532081	0.539729	0.0564458	0.539729	0.059202	0.539729	0.0615337	0.539729	0.0638654	0.539729	0.0657966	0.539729	0.168918	0.539729	0.126689	0.539729	0.134748	0.539729	0.143154	0.539729	0.153077	0.539729	0.162328	0.539729	0.169695	0.539729	0.176624	0.539729	0.182727	0.539729	0.188578	0.539729	0.124023	0.539729	0.163081	0.539729	0.211991	0.539729	0.340532	0.539729	0.393972
0.559729	0.0655439	0.559729	0.0478572	0.559729	0.0490169	0.559729	0.0518586	0.559729	0.0552203	0.559729	0.0584772	0.559729	0.0612285	0.559729	0.0636556	0.559729	0.066097	0.559729	0.0680711	0.559729	0.164717	0.559729	0.131286	0.559729	0.139192	0.559729	0.148213	0.559729	0.158332	0.559729	0.167955	0.559729	0.176514	0.559729	0.182846	0.559729	0.189174	0.559729	0.195344	0.559729	0.130103	0.559729	0.168698	0.559729	0.218037	0.559729	0.346817	0.559729	0.397996
0.579729	0.0674369	0.579729	0.0499458	0.579729	0.0509243	0.579729	0.0538232	0.579729	0.057266	0.579729	0.0606277	0.579729	0.0634935	0.579729	0.0661685	0.579729	0.0685813	0.579729	0.0706699	0.579729	0.170882	0.579729	0.135754	0.579729	0.143741	0.579729	0.153506	0.579729	0.164102	0.579729	0.174077	0.579729	0.190619	0.579729	0.189985	0.579729	0.196536	0.579729	0.202721	0.579729	0.136235	0.579729	0.174931	0.579729	0.225299	0.579729	0.353211	0.579729	0.403155
0.599729	0.0705507	0.599729	0.0521693	0.599729	0.0528695	0.599729	0.055969	0.599729	0.05955	0.599729	0.0632122	0.599729	0.0659873	0.599729	0.0688341	0.599729	0.0712326	0.599729	0.0734785	0.599729	0.180386	0.599729	0.140417	0.599729	0.149019	0.599729	0.159066	0.599729	0.170143	0.599729	0.180615	0.599729	0.199817	0.599729	0.197199	0.599729	0.204199	0.599729	0.210665	0.599729	0.142096	0.599729	0.181287	0.599729	0.232347	0.599729	0.359558	0.599729	0.408749
0.619729	0.0740555	0.619729	0.054424	0.619729	0.0551202	0.619729	0.0583818	0.619729	0.0621297	0.619729	0.0656726	0.619729	0.0687864	0.619729	0.0714901	0.619729	0.0742176	0.619729	0.0764969	0.619729	0.196884	0.619729	0.14602	0.619729	0.15395	0.619729	0.164917	0.619729	0.176399	0.619729	0.187023	0.619729	0.214046	0.619729	0.204738	0.619729	0.212248	0.619729	0.219153	0.619729	0.142439	0.619729	0.188139	0.619729	0.239371	0.619729	0.36507	0.619729	0.414619
0.639729	0.0802687	0.639729	0.057452	0.639729	0.0577762	0.639729	0.0613048	0.639729	0.065377	0.639729	0.0691202	0.639729	0.0720528	0.639729	0.0748804	0.639729	0.0777748	0.639729	0.0800779	0.639729	0.217236	0.639729	0.152419	0.639729	0.159181	0.639729	0.171369	0.639729	0.183824	0.639729	0.202573	0.639729	0.208529	0.639729	0.213679	0.639729	0.221599	0.639729	0.228814	0.639729	0.152252	0.639729	0.195263	0.639729	0.246938	0.639729	0.369319	0.639729	0.421685
0.659651	0.0882271	0.659651	0.0612571	0.659651	0.0610378	0.659651	0.0649383	0.659651	0.0692919	0.659651	0.0733116	0.659651	0.0762728	0.659651	0.0790384	0.659651	0.0820378	0.659651	0.0845841	0.659651	0.250677	0.659651	0.160568	0.659651	0.166152	0.659651	0.186632	0.659651	0.192006	0.659651	0.212401	0.659651	0.216483	0.659651	0.223354	0.659651	0.231789	0.659651	0.239662	0.659651	0.166424	0.659651	0.204171	0.659651	0.255698	0.659651	0.370788	0.659651	0.428685
0.679651	0.100305	0.679651	0.0664833	0.679651	0.0653055	0.679651	0.0698689	0.679651	0.0746897	0.679651	0.0789812	0.679651	0.0817612	0.679651	0.0845126	0.679651	0.0876072	0.679651	0.0904492	0.679651	0.291918	0.679651	0.172017	0.679651	0.175904	0.679651	0.203493	0.679651	0.206412	0.679651	0.223759	0.679651	0.226615	0.679651	0.235341	0.679651	0.244268	0.679651	0.253023	0.679651	0.186494	0.679651	0.216335	0.679651	0.26532	0.679651	0.379237	0.679651	0.437235
0.699651	0.113628	0.699651	0.0736788	0.699651	0.0708941	0.699651	0.0760582	0.699651	0.0816897	0.699651	0.0874451	0.699651	0.0890091	0.699651	0.0914649	0.699651	0.0948838	0.699651	0.0978307	0.699651	0.344576	0.699651	0.188082	0.699651	0.188959	0.699651	0.221499	0.699651	0.218218	0.699651	0.24494	0.699651	0.240625	0.699651	0.250028	0.699651	0.259703	0.699651	0.271886	0.699651	0.214089	0.699651	0.227121	0.699651	0.276641	0.699651	0.390085	0.699651	0.446972
0.719651	0.126732	0.719651	0.0814608	0.719651	0.0776318	0.719651	0.0834492	0.719651	0.0900439	0.719651	0.0953464	0.719651	0.0974826	0.719651	0.0998048	0.719651	0.103686	0.719651	0.106948	0.719651	0.3972	0.719651	0.209225	0.719651	0.205801	0.719651	0.246185	0.719651	0.235046	0.719651	0.262226	0.719651	0.258006	0.719651	0.267933	0.719651	0.278085	0.719651	0.289663	0.719651	0.24433	0.719651	0.242818	0.719651	0.289935	0.719651	0.403833	0.719651	0.457901
0.739652	0.138453	0.739652	0.0898579	0.739652	0.0850562	0.739652	0.0916842	0.739652	0.0992326	0.739652	0.104926	0.739652	0.106934	0.739652	0.109418	0.739652	0.113595	0.739652	0.117271	0.739652	0.439286	0.739652	0.234226	0.739652	0.225676	0.739652	0.270923	0.739652	0.253457	0.739652	0.279935	0.739652	0.278667	0.739652	0.289334	0.739652	0.300139	0.739652	0.316919	0.739652	0.272873	0.739652	0.260614	0.739652	0.305332	0.739652	0.419535	0.739652	0.470061
0.759651	0.146821	0.759651	0.097783	0.759651	0.0923375	0.759651	0.0998382	0.759651	0.108512	0.759651	0.114825	0.759651	0.11678	0.759651	0.119436	0.759651	0.123947	0.759651	0.127857	0.759651	0.463609	0.759651	0.259264	0.759651	0.245603	0.759651	0.286087	0.759651	0.273594	0.759651	0.292271	0.759651	0.299901	0.759651	0.311063	0.759651	0.322827	0.759651	0.340399	0.759651	0.295371	0.759651	0.277423	0.759651	0.320252	0.759651	0.435743	0.759651	0.481586
0.779652	0.15333	0.779652	0.10506	0.779652	0.0991515	0.779652	0.107434	0.779652	0.117348	0.779652	0.124496	0.779652	0.126613	0.779652	0.129703	0.779652	0.134376	0.779652	0.138567	0.779652	0.48109	0.779652	0.281819	0.779652	0.263427	0.779652	0.299982	0.779652	0.292786	0.779652	0.314034	0.779652	0.320143	0.779652	0.332388	0.779652	0.344824	0.779652	0.362152	0.779652	0.312351	0.779652	0.290841	0.779652	0.33368	0.779652	0.439667	0.779652	0.491657
0.799573	0.15889	0.799573	0.111011	0.799573	0.10526	0.799573	0.11421	0.799573	0.125263	0.799573	0.133317	0.799573	0.13594	0.799573	0.139378	0.799573	0.144418	0.799573	0.148867	0.799573	0.490655	0.799573	0.300001	0.799573	0.278257	0.799573	0.329207	0.799573	0.309027	0.799573	0.329193	0.799573	0.341829	0.799573	0.351118	0.799573	0.364603	0.799573	0.3836	0.799573	0.325073	0.799573	0.30259	0.799573	0.344385	0.799573	0.459871	0.799573	0.499405
0.819573	0.163601	0.819573	0.116599	0.819573	0.110758	0.819573	0.120409	0.819573	0.132459	0.819573	0.141662	0.819573	0.144661	0.819573	0.148757	0.819573	0.154136	0.819573	0.158828	0.819573	0.498714	0.819573	0.308613	0.819573	0.29117	0.819573	0.353059	0.819573	0.323261	0.819573	0.344895	0.819573	0.354608	0.819573	0.368027	0.819573	0.382933	0.819573	0.401701	0.819573	0.336474	0.819573	0.312895	0.819573	0.35375	0.819573	0.470366	0.819573	0.506472
0.839574	0.168269	0.839574	0.121906	0.839574	0.11597	0.839574	0.12594	0.839574	0.139039	0.839574	0.149353	0.839574	0.152867	0.839574	0.157493	0.839574	0.163487	0.839574	0.168403	0.839574	0.512929	0.839574	0.318545	0.839574	0.302309	0.839574	0.364522	0.839574	0.33594	0.839574	0.35797	0.839574	0.368728	0.839574	0.383815	0.839574	0.399536	0.839574	0.419344	0.839574	0.347289	0.839574	0.322069	0.839574	0.362562	0.839574	0.481357	0.839574	0.513818
0.859573	0.170887	0.859573	0.125669	0.859573	0.120757	0.859573	0.131062	0.859573	0.145209	0.859573	0.156396	0.859573	0.160344	0.859573	0.165427	0.859573	0.171922	0.859573	0.177277	0.859573	0.51625	0.859573	0.336059	0.859573	0.310901	0.859573	0.383667	0.859573	0.347103	0.859573	0.369338	0.859573	0.381474	0.859573	0.39781	0.859573	0.414533	0.859573	0.435523	0.859573	0.358704	0.859573	0.330771	0.859573	0.370773	0.859573	0.491104	0.859573	0.519444
0.879574	0.175207	0.879574	0.130179	0.879574	0.125835	0.879574	0.13635	0.879574	0.151418	0.879574	0.163401	0.879574	0.168007	0.879574	0.173529	0.879574	0.180381	0.879574	0.186222	0.879574	0.532701	0.879574	0.353269	0.879574	0.319675	0.879574	0.395269	0.879574	0.35797	0.879574	0.385069	0.879574	0.394172	0.879574	0.411333	0.879574	0.42973	0.879574	0.451741	0.879574	0.371422	0.879574	0.341643	0.879574	0.379838	0.879574	0.500683	0.879574	0.52221
0.899573	0.179618	0.899573	0.134972	0.899573	0.130809	0.899573	0.14159	0.899573	0.157798	0.899573	0.170448	0.899573	0.175322	0.899573	0.181301	0.899573	0.188711	0.899573	0.194991	0.899573	0.535323	0.899573	0.363745	0.899573	0.328101	0.899573	0.403532	0.899573	0.36847	0.899573	0.392655	0.899573	0.406236	0.899573	0.424637	0.899573	0.444011	0.899573	0.468068	0.899573	0.384625	0.899573	0.349277	0.899573	0.389365	0.899573	0.509574	0.899573	0.520112
0.919574	0.182722	0.919574	0.140398	0.919574	0.13645	0.919574	0.147412	0.919574	0.16476	0.919574	0.178016	0.919574	0.183113	0.919574	0.189465	0.919574	0.19749	0.919574	0.204123	0.919574	0.548007	0.919574	0.395778	0.919574	0.337213	0.919574	0.388359	0.919574	0.379566	0.919574	0.409021	0.919574	0.418891	0.919574	0.438723	0.919574	0.459122	0.919574	0.482692	0.919574	0.398368	0.919574	0.357937	0.919574	0.3974	0.919574	0.518634	0.919574	0.515582
0.939496	0.189026	0.939496	0.146463	0.939496	0.143321	0.939496	0.153835	0.939496	0.171812	0.939496	0.185936	0.939496	0.191124	0.939496	0.198015	0.939496	0.206464	0.939496	0.213464	0.939496	0.549581	0.939496	0.424461	0.939496	0.346912	0.939496	0.395912	0.939496	0.391459	0.939496	0.417995	0.939496	0.432495	0.939496	0.453252	0.939496	0.488934	0.939496	0.500102	0.939496	0.41376	0.939496	0.367083	0.939496	0.406736	0.939496	0.528218	0.939496	0.508668
0.959496	0.196751	0.959496	0.153349	0.959496	0.150545	0.959496	0.160821	0.959496	0.179632	0.959496	0.194276	0.959496	0.199865	0.959496	0.206893	0.959496	0.215748	0.959496	0.223092	0.959496	0.551822	0.959496	0.441636	0.959496	0.357193	0.959496	0.414385	0.959496	0.404324	0.959496	0.430516	0.959496	0.446624	0.959496	0.468735	0.959496	0.505337	0.959496	0.518109	0.959496	0.430106	0.959496	0.377764	0.959496	0.416822	0.959496	0.538375	0.959496	0.499465
0.979496	0.204752	0.979496	0.161551	0.979496	0.157536	0.979496	0.168546	0.979496	0.18813	0.979496	0.20357	0.979496	0.209335	0.979496	0.216306	0.979496	0.225738	0.979496	0.233444	0.979496	0.561597	0.979496	0.45423	0.979496	0.368957	0.979496	0.434159	0.979496	0.418462	0.979496	0.44588	0.979496	0.46205	0.979496	0.487899	0.979496	0.522735	0.979496	0.536897	0.979496	0.44773	0.979496	0.389356	0.979496	0.427665	0.979496	0.549676	0.979496	0.488069
0.999496	0.212482	0.999496	0.169929	0.999496	0.165151	0.999496	0.177024	0.999496	0.197581	0.999496	0.213416	0.999496	0.219229	0.999496	0.227049	0.999496	0.236534	0.999496	0.244711	0.999496	0.572994	0.999496	0.469062	0.999496	0.381745	0.999496	0.446996	0.999496	0.434236	0.999496	0.460705	0.999496	0.478987	0.999496	0.506663	0.999496	0.545671	0.999496	0.557973	0.999496	0.467419	0.999496	0.402574	0.999496	0.439419	0.999496	0.561597	0.999496	0.475146
1.0195	0.22282	1.0195	0.179585	1.0195	0.174144	1.0195	0.186847	1.0195	0.20788	1.0195	0.225018	1.0195	0.230316	1.0195	0.238422	1.0195	0.248607	1.0195	0.257524	1.0195	0.610139	1.0195	0.48845	1.0195	0.397047	1.0195	0.466589	1.0195	0.452732	1.0195	0.482416	1.0195	0.49808	1.0195	0.532081	1.0195	0.58234	1.0195	0.581338	1.0195	0.489954	1.0195	0.417752	1.0195	0.453009	1.0195	0.570276	1.0195	0.462176
1.0395	0.231832	1.0395	0.190237	1.0395	0.185011	1.0395	0.197876	1.0395	0.219863	1.0395	0.237735	1.0395	0.242871	1.0395	0.251783	1.0395	0.262416	1.0395	0.271782	1.0395	0.612524	1.0395	0.491931	1.0395	0.415358	1.0395	0.497784	1.0395	0.474958	1.0395	0.502758	1.0395	0.521135	1.0395	0.549104	1.0395	0.649717	1.0395	0.610092	1.0395	0.520305	1.0395	0.435905	1.0395	0.469078	1.0395	0.580003	1.0395	0.450208
1.0595	0.242189	1.0595	0.202478	1.0595	0.196975	1.0595	0.209997	1.0595	0.23351	1.0595	0.251931	1.0595	0.257152	1.0595	0.266279	1.0595	0.277637	1.0595	0.287665	1.0595	0.631979	1.0595	0.515201	1.0595	0.43714	1.0595	0.52258	1.0595	0.501074	1.0595	0.529458	1.0595	0.548341	1.0595	0.580194	1.0595	0.674846	1.0595	0.646331	1.0595	0.549199	1.0595	0.456642	1.0595	0.487046	1.0595	0.587966	1.0595	0.442292
1.07942	0.258139	1.07942	0.21735	1.07942	0.211862	1.07942	0.2255	1.07942	0.250257	1.07942	0.269388	1.07942	0.273985	1.07942	0.283378	1.07942	0.295366	1.07942	0.305918	1.07942	0.661638	1.07942	0.530221	1.07942	0.462956	1.07942	0.563028	1.07942	0.532367	1.07942	0.560071	1.07942	0.580766	1.07942	0.61343	1.07942	0.726345	1.07942	0.698164	1.07942	0.584104	1.07942	0.480933	1.07942	0.507454	1.07942	0.597646	1.07942	0.444724
1.09942	0.278376	1.09942	0.235923	1.09942	0.229324	1.09942	0.244049	1.09942	0.270494	1.09942	0.291027	1.09942	0.294422	1.09942	0.303463	1.09942	0.316242	1.09942	0.327114	1.09942	0.705841	1.09942	0.560691	1.09942	0.492558	1.09942	0.599267	1.09942	0.568416	1.09942	0.595357	1.09942	0.617721	1.09942	0.651052	1.09942	0.775793	1.09942	0.726393	1.09942	0.621822	1.09942	0.507535	1.09942	0.531985	1.09942	0.60971	1.09942	0.45984
1.11942	0.305208	1.11942	0.259326	1.11942	0.252198	1.11942	0.267061	1.11942	0.296172	1.11942	0.317339	1.11942	0.320009	1.11942	0.328239	1.11942	0.341681	1.11942	0.353097	1.11942	0.739124	1.11942	0.601509	1.11942	0.530138	1.11942	0.648811	1.11942	0.611141	1.11942	0.637891	1.11942	0.662258	1.11942	0.696781	1.11942	0.801828	1.11942	0.776413	1.11942	0.666978	1.11942	0.53971	1.11942	0.561215	1.11942	0.628641	1.11942	0.487401
1.13942	0.341863	1.13942	0.290478	1.13942	0.280698	1.13942	0.295891	1.13942	0.327886	1.13942	0.350107	1.13942	0.351218	1.13942	0.359153	1.13942	0.373229	1.13942	0.384716	1.13942	0.792149	1.13942	0.653245	1.13942	0.576618	1.13942	0.712517	1.13942	0.662735	1.13942	0.689104	1.13942	0.71533	1.13942	0.751617	1.13942	0.805023	1.13942	0.836352	1.13942	0.719574	1.13942	0.578859	1.13942	0.597456	1.13942	0.655534	1.13942	0.525167
1.15942	0.392307	1.15942	0.329398	1.15942	0.316347	1.15942	0.331892	1.15942	0.366935	1.15942	0.390686	1.15942	0.389942	1.15942	0.397328	1.15942	0.411948	1.15942	0.424046	1.15942	0.853709	1.15942	0.736216	1.15942	0.6336	1.15942	0.79191	1.15942	0.728539	1.15942	0.750568	1.15942	0.779655	1.15942	0.818995	1.15942	0.876645	1.15942	0.909594	1.15942	0.78614	1.15942	0.628021	1.15942	0.641944	1.15942	0.695541	1.15942	0.573614
1.17942	0.449952	1.17942	0.378317	1.17942	0.361089	1.17942	0.37639	1.17942	0.416817	1.17942	0.438814	1.17942	0.436897	1.17942	0.444197	1.17942	0.459384	1.17942	0.47203	1.17942	0.944928	1.17942	0.816611	1.17942	0.699547	1.17942	0.841263	1.17942	0.844172	1.17942	0.827721	1.17942	0.858477	1.17942	0.900916	1.17942	0.962285	1.17942	0.998477	1.17942	0.901488	1.17942	0.692585	1.17942	0.699356	1.17942	0.749138	1.17942	0.633743
1.19942	0.525851	1.19942	0.440821	1.19942	0.416149	1.19942	0.430717	1.19942	0.471863	1.19942	0.495834	1.19942	0.492362	1.19942	0.500564	1.19942	0.516543	1.19942	0.52998	1.19942	1.0638	1.19942	0.915698	1.19942	0.786236	1.19942	0.924471	1.19942	0.91751	1.19942	0.921467	1.19942	0.954465	1.19942	1.00048	1.19942	1.06371	1.19942	1.10648	1.19942	1.00925	1.19942	0.773075	1.19942	0.772503	1.19942	0.817517	1.19942	0.707987
1.21934	0.616338	1.21934	0.517511	1.21934	0.484337	1.21934	0.497083	1.21934	0.539617	1.21934	0.565724	1.21934	0.560102	1.21934	0.568511	1.21934	0.585821	1.21934	0.600317	1.21934	1.21673	1.21934	1.0412	1.21934	0.897006	1.21934	1.03977	1.21934	1.03739	1.21934	1.04249	1.21934	1.07263	1.21934	1.12246	1.21934	1.18912	1.21934	1.2378	1.21934	1.1442	1.21934	0.875691	1.21934	0.86501	1.21934	0.903729	1.21934	0.799349
1.23934	0.725391	1.23934	0.610807	1.23934	0.568552	1.23934	0.578618	1.23934	0.62187	1.23934	0.647428	1.23934	0.641515	1.23934	0.65048	1.23934	0.669076	1.23934	0.683572	1.23934	1.37837	1.23934	1.18793	1.23934	1.03486	1.23934	1.17906	1.23934	1.19374	1.23934	1.18049	1.23934	1.21568	1.23934	1.26937	1.23934	1.34075	1.23934	1.39559	1.23934	1.30079	1.23934	1.00243	1.23934	0.979833	1.23934	1.0093	1.23934	0.909403
1.25934	0.851515	1.25934	0.723007	1.25934	0.672843	1.25934	0.678136	1.25934	0.721863	1.25934	0.746658	1.25934	0.739744	1.25934	0.749805	1.25934	0.769833	1.25934	0.784424	1.25934	1.58971	1.25934	1.37246	1.25934	1.2059	1.25934	1.35329	1.25934	1.37661	1.25934	1.3541	1.25934	1.38991	1.25934	1.44919	1.25934	1.52491	1.25934	1.5879	1.25934	1.487	1.25934	1.15612	1.25934	1.12193	1.25934	1.14043	1.25934	1.04421
1.27934	1.00716	1.27934	0.861624	1.27934	0.798347	1.27934	0.801447	1.27934	0.846079	1.27934	0.8683	1.27934	0.859383	1.27934	0.870732	1.27934	0.891284	1.27934	0.905112	1.27934	1.84057	1.27934	1.57684	1.27934	1.41585	1.27934	1.55852	1.27934	1.55156	1.27934	1.56143	1.27934	1.60187	1.27934	1.66667	1.27934	1.7484	1.27934	1.81668	1.27934	1.7216	1.27934	1.33932	1.27934	1.29712	1.27934	1.30346	1.27934	1.20619
1.29934	1.19355	1.29934	1.03896	1.29934	0.968293	1.29934	0.962428	1.29934	1.00572	1.29934	1.02122	1.29934	1.00696	1.29934	1.02146	1.29934	1.03991	1.29934	1.05336	1.29934	2.14003	1.29934	1.84158	1.29934	1.66968	1.29934	1.81001	1.29934	1.79012	1.29934	1.81344	1.29934	1.85722	1.29934	1.9244	1.29934	2.01624	1.29934	2.09077	1.29934	1.97705	1.29934	1.56458	1.29934	1.50979	1.29934	1.50745	1.29934	1.40093
1.27934	0.883416	1.27934	0.774744	1.27934	0.709894	1.27934	0.711372	1.27934	0.752523	1.27934	0.771931	1.27934	0.758436	1.27934	0.769451	1.27934	0.785616	1.27934	0.795248	1.27934	1.65799	1.27934	1.43097	1.27934	1.28038	1.27934	1.41147	1.27934	1.37404	1.27934	1.38829	1.27934	1.41552	1.27934	1.45872	1.27934	1.52357	1.27934	1.57407	1.27934	1.54799	1.27934	1.24162	1.27934	1.19412	1.27934	1.16141	1.27934	1.0578
1.25934	0.681283	1.25934	0.590255	1.25934	0.540473	1.25934	0.543382	1.25934	0.581481	1.25934	0.60003	1.25934	0.588968	1.25934	0.598171	1.25934	0.611856	1.25934	0.620582	1.25934	1.32077	1.25934	1.13795	1.25934	1.0032	1.25934	1.1247	1.25934	1.08369	1.25934	1.09146	1.25934	1.10748	1.25934	1.13762	1.25934	1.1875	1.25934	1.22388	1.25934	1.23561	1.25934	1.01145	1.25934	0.965289	1.25934	0.910309	1.25934	0.820616
1.23934	0.529887	1.23934	0.461652	1.23934	0.420405	1.23934	0.424315	1.23934	0.458934	1.23934	0.476243	1.23934	0.466945	1.23934	0.47405	1.23934	0.486114	1.23934	0.494315	1.23934	1.06571	1.23934	0.927762	1.23934	0.798061	1.23934	0.910643	1.23934	0.871638	1.23934	0.871924	1.23934	0.882367	1.23934	0.904301	1.23934	0.943927	1.23934	0.971202	1.23934	1	1.23934	0.831297	1.23934	0.788572	1.23934	0.723341	1.23934	0.650432
1.21934	0.422312	1.21934	0.369193	1.21934	0.332285	1.21934	0.337435	1.21934	0.370814	1.21934	0.383593	1.21934	0.375773	1.21934	0.381209	1.21934	0.391985	1.21934	0.39909	1.21934	0.878457	1.21934	0.753859	1.21934	0.641372	1.21934	0.751808	1.21934	0.705984	1.21934	0.704697	1.21934	0.712326	1.21934	0.72892	1.21934	0.761965	1.21934	0.782946	1.21934	0.819186	1.21934	0.686624	1.21934	0.650146	1.21934	0.580146	1.21934	0.521161
1.19942	0.34001	1.19942	0.29347	1.19942	0.265003	1.19942	0.270725	1.19942	0.298954	1.19942	0.311829	1.19942	0.304962	1.19942	0.309921	1.19942	0.319458	1.19942	0.325991	1.19942	0.735977	1.19942	0.62659	1.19942	0.519778	1.19942	0.627878	1.19942	0.576522	1.19942	0.57452	1.19942	0.580289	1.19942	0.593641	1.19942	0.621727	1.19942	0.638273	1.19942	0.67456	1.19942	0.567939	1.19942	0.541284	1.19942	0.468423	1.19942	0.421645
1.17942	0.276733	1.17942	0.239635	1.17942	0.213076	1.17942	0.218988	1.17942	0.244213	1.17942	0.255371	1.17942	0.249935	1.17942	0.254084	1.17942	0.262428	1.17942	0.268484	1.17942	0.614192	1.17942	0.537755	1.17942	0.425078	1.17942	0.530555	1.17942	0.478246	1.17942	0.471856	1.17942	0.477387	1.17942	0.488212	1.17942	0.512864	1.17942	0.526168	1.17942	0.562789	1.17942	0.473907	1.17942	0.453736	1.17942	0.380541	1.17942	0.344063
1.15942	0.223423	1.15942	0.190712	1.15942	0.172592	1.15942	0.178743	1.15942	0.200392	1.15942	0.210119	1.15942	0.206018	1.15942	0.209642	1.15942	0.217081	1.15942	0.22266	1.15942	0.52283	1.15942	0.437047	1.15942	0.350214	1.15942	0.448825	1.15942	0.396754	1.15942	0.39046	1.15942	0.395705	1.15942	0.404812	1.15942	0.426842	1.15942	0.437858	1.15942	0.473191	1.15942	0.399662	1.15942	0.383212	1.15942	0.311638	1.15942	0.282598
1.13942	0.178695	1.13942	0.157094	1.13942	0.140739	1.13942	0.146223	1.13942	0.165153	1.13942	0.173784	1.13942	0.17078	1.13942	0.174308	1.13942	0.180889	1.13942	0.186086	1.13942	0.450589	1.13942	0.375201	1.13942	0.291611	1.13942	0.384165	1.13942	0.336815	1.13942	0.325943	1.13942	0.330712	1.13942	0.33858	1.13942	0.358321	1.13942	0.367714	1.13942	0.402142	1.13942	0.340201	1.13942	0.324418	1.13942	0.256897	1.13942	0.234343
1.11942	0.146509	1.11942	0.128818	1.11942	0.115705	1.11942	0.120712	1.11942	0.137496	1.11942	0.144887	1.11942	0.142837	1.11942	0.146461	1.11942	0.152135	1.11942	0.157142	1.11942	0.403573	1.11942	0.335957	1.11942	0.251461	1.11942	0.333573	1.11942	0.283504	1.11942	0.274826	1.11942	0.279022	1.11942	0.28565	1.11942	0.303675	1.11942	0.311733	1.11942	0.345589	1.11942	0.292803	1.11942	0.277306	1.11942	0.213123	1.11942	0.196005
1.09942	0.122095	1.09942	0.107551	1.09942	0.0961547	1.09942	0.101066	1.09942	0.115371	1.09942	0.121999	1.09942	0.120664	1.09942	0.124288	1.09942	0.129247	1.09942	0.133729	1.09942	0.350834	1.09942	0.290323	1.09942	0.216604	1.09942	0.294424	1.09942	0.240875	1.09942	0.233961	1.09942	0.237776	1.09942	0.243259	1.09942	0.259615	1.09942	0.266243	1.09942	0.300003	1.09942	0.254227	1.09942	0.238634	1.09942	0.177074	1.09942	0.165248
1.07942	0.102973	1.07942	0.091689	1.07942	0.0813273	1.07942	0.0858191	1.07942	0.0982455	1.07942	0.104309	1.07942	0.103405	1.07942	0.106645	1.07942	0.111223	1.07942	0.115324	1.07942	0.3217	1.07942	0.278736	1.07942	0.1889	1.07942	0.260044	1.07942	0.209738	1.07942	0.201393	1.07942	0.204493	1.07942	0.209023	1.07942	0.223948	1.07942	0.230242	1.07942	0.263859	1.07942	0.222517	1.07942	0.206209	1.07942	0.147415	1.07942	0.139928
1.0595	0.0888756	1.0595	0.0790575	1.0595	0.0694445	1.0595	0.0735739	1.0595	0.0847128	1.0595	0.0901965	1.0595	0.0894335	1.0595	0.0926379	1.0595	0.0967196	1.0595	0.100406	1.0595	0.296474	1.0595	0.258423	1.0595	0.164962	1.0595	0.232388	1.0595	0.187517	1.0595	0.17469	1.0595	0.177217	1.0595	0.180793	1.0595	0.194527	1.0595	0.200201	1.0595	0.233294	1.0595	0.195433	1.0595	0.179744	1.0595	0.121904	1.0595	0.118471
1.0395	0.0790718	1.0395	0.0692061	1.0395	0.0600841	1.0395	0.0637558	1.0395	0.0738314	1.0395	0.0789526	1.0395	0.078142	1.0395	0.0810936	1.0395	0.0847033	1.0395	0.0880412	1.0395	0.269724	1.0395	0.278212	1.0395	0.146413	1.0395	0.213505	1.0395	0.161481	1.0395	0.152469	1.0395	0.154424	1.0395	0.157333	1.0395	0.17016	1.0395	0.175024	1.0395	0.207401	1.0395	0.172115	1.0395	0.169158	1.0395	0.0999217	1.0395	0.100091
1.0195	0.0695589	1.0195	0.0611188	1.0195	0.0524356	1.0195	0.0556781	1.0195	0.0649288	1.0195	0.0697353	1.0195	0.0687531	1.0195	0.0712708	1.0195	0.0744846	1.0195	0.0776651	1.0195	0.237823	1.0195	0.314785	1.0195	0.130392	1.0195	0.192286	1.0195	0.142932	1.0195	0.133586	1.0195	0.135208	1.0195	0.137544	1.0195	0.149417	1.0195	0.153566	1.0195	0.184083	1.0195	0.151325	1.0195	0.199772	1.0195	0.0796536	1.0195	0.082796
0.999496	0.0618627	0.999496	0.0545337	0.999496	0.0460984	0.999496	0.0490119	0.999496	0.0574615	0.999496	0.0616386	0.999496	0.0606611	0.999496	0.0629833	0.999496	0.0657489	0.999496	0.0684621	0.999496	0.22719	0.999496	0.601938	0.999496	0.119217	0.999496	0.172878	0.999496	0.13141	0.999496	0.117677	0.999496	0.118831	0.999496	0.12059	0.999496	0.131631	0.999496	0.13516	0.999496	0.163293	0.999496	0.132394	0.999496	0.252126	0.999496	0.060766	0.999496	0.0670459
0.979496	0.0553252	0.979496	0.0487163	0.979496	0.0405623	0.979496	0.0431134	0.979496	0.0508716	0.979496	0.0545766	0.979496	0.0536658	0.979496	0.0555493	0.979496	0.0580528	0.979496	0.0605752	0.979496	0.204683	0.979496	0.614431	0.979496	0.106194	0.979496	0.152326	0.979496	0.114901	0.979496	0.103639	0.979496	0.10443	0.979496	0.105679	0.979496	0.116218	0.979496	0.119346	0.979496	0.144363	0.979496	0.115445	0.979496	0.220855	0.979496	0.0427987	0.979496	0.0519111
0.959496	0.0493838	0.959496	0.043142	0.959496	0.0405289	0.959496	0.0382306	0.959496	0.0450017	0.959496	0.0482585	0.959496	0.0473001	0.959496	0.0488879	0.959496	0.0511195	0.959496	0.0533082	0.959496	0.190521	0.959496	0.323941	0.959496	0.0958423	0.959496	0.142682	0.959496	0.101226	0.959496	0.090988	0.959496	0.0914887	0.959496	0.0921801	0.959496	0.10226	0.959496	0.104893	0.959496	0.126689	0.959496	0.0994424	0.959496	0.177491	0.959496	0.0254084	0.959496	0.0369669
0.939496	0.0440814	0.939496	0.0378253	0.939496	0.0345017	0.939496	0.0337626	0.939496	0.0401951	0.939496	0.0425936	0.939496	0.0415017	0.939496	0.0429083	0.939496	0.0448157	0.939496	0.046642	0.939496	0.189138	0.939496	0.243259	0.939496	0.0845364	0.939496	0.127948	0.939496	0.0907019	0.939496	0.0794724	0.939496	0.0797394	0.939496	0.080097	0.939496	0.089691	0.939496	0.0919894	0.939496	0.109952	0.939496	0.0844506	0.939496	0.127752	0.939496	0.00866656	0.939496	0.0219513
0.919574	0.0396801	0.919574	0.0334097	0.919574	0.030234	0.919574	0.029347	0.919574	0.0351025	0.919574	0.0372054	0.919574	0.036409	0.919574	0.0373961	0.919574	0.0389315	0.919574	0.0405528	0.919574	0.163882	0.919574	0.210215	0.919574	0.0736502	0.919574	0.124882	0.919574	0.0797346	0.919574	0.0688818	0.919574	0.0689247	0.919574	0.0689629	0.919574	0.0782803	0.919574	0.0800207	0.919574	0.0942449	0.919574	0.0702885	0.919574	0.150169	0.919574	-0.0073791	0.919574	0.00692134
0.899573	0.0354125	0.899573	0.0305582	0.899573	0.0258995	0.899573	0.0254084	0.899573	0.0305773	0.899573	0.0323273	0.899573	0.0313689	0.899573	0.0322987	0.899573	0.0335814	0.899573	0.0348879	0.899573	0.151108	0.899573	0.189901	0.899573	0.0643709	0.899573	0.100263	0.899573	0.0695446	0.899573	0.0593593	0.899573	0.059159	0.899573	0.0589206	0.899573	0.0676897	0.899573	0.0686147	0.899573	0.0796583	0.899573	0.057061	0.899573	0.132711	0.899573	-0.0226809	0.899573	-0.00799899
0.879574	0.0315691	0.879574	0.0263048	0.879574	0.0219656	0.879574	0.0219227	0.879574	0.0264288	0.879574	0.0278879	0.879574	0.0269485	0.879574	0.0278688	0.879574	0.0286938	0.879574	0.0297762	0.879574	0.137146	0.879574	0.177217	0.879574	0.0567319	0.879574	0.0881651	0.879574	0.0614574	0.879574	0.0507237	0.879574	0.0502469	0.879574	0.0497081	0.879574	0.0582244	0.879574	0.0592735	0.879574	0.0664976	0.879574	0.0448586	0.879574	0.0488021	0.879574	-0.037048	0.879574	-0.0227428
0.859573	0.0278879	0.859573	0.0232578	0.859573	0.0187899	0.859573	0.0188471	0.859573	0.0225998	0.859573	0.0237967	0.859573	0.0227762	0.859573	0.0233913	0.859573	0.0241734	0.859573	0.025046	0.859573	0.130361	0.859573	0.158954	0.859573	0.0484492	0.859573	0.0834445	0.859573	0.0523211	0.859573	0.0427557	0.859573	0.04205	0.859573	0.0412203	0.859573	0.0493457	0.859573	0.0499227	0.859573	0.0539805	0.859573	0.0333764	0.859573	0.00738387	0.859573	-0.0510051	0.859573	-0.0374295
0.839574	0.0248028	0.839574	0.0210834	0.839574	0.0160146	0.839574	0.0158859	0.839574	0.0191713	0.839574	0.0200726	0.839574	0.0190378	0.839574	0.0194622	0.839574	0.020063	0.839574	0.0208117	0.839574	0.124505	0.839574	0.152577	0.839574	0.0413109	0.839574	0.0675609	0.839574	0.0451447	0.839574	0.035298	0.839574	0.0344636	0.839574	0.0333287	0.839574	0.0409152	0.839574	0.0413872	0.839574	0.0431801	0.839574	0.0226332	0.839574	-0.00706439	0.839574	-0.064018	0.839574	-0.0515344
0.819573	0.0220514	0.819573	0.0183607	0.819573	0.0135208	0.819573	0.0131536	0.819573	0.015924	0.819573	0.0165868	0.819573	0.0154901	0.819573	0.0158906	0.819573	0.0162292	0.819573	0.0168014	0.819573	0.11874	0.819573	0.139072	0.819573	0.0358082	0.819573	0.0584724	0.819573	0.0375058	0.819573	0.0282217	0.819573	0.0271488	0.819573	0.0256754	0.819573	0.0330569	0.819573	0.0333287	0.819573	0.0323035	0.819573	0.0121618	0.819573	-0.0211836	0.819573	-0.0764874	0.819573	-0.0653341
0.799573	0.0197912	0.799573	0.0155282	0.799573	0.0112224	0.799573	0.0106216	0.799573	0.0128913	0.799573	0.0133205	0.799573	0.0126482	0.799573	0.0124717	0.799573	0.0126386	0.799573	0.013001	0.799573	0.10526	0.799573	0.126417	0.799573	0.0300194	0.799573	0.0690153	0.799573	0.0293089	0.799573	0.0213362	0.799573	0.0202156	0.799573	0.0241209	0.799573	0.0252367	0.799573	0.025251	0.799573	0.021689	0.799573	0.00202417	0.799573	-0.0343396	0.799573	-0.0884274	0.799573	-0.078471
0.779652	0.0198675	0.779652	0.0123334	0.779652	0.00898913	0.779652	0.00837401	0.779652	0.0101543	0.779652	0.0102878	0.779652	0.00957732	0.779652	0.00922446	0.779652	0.00931506	0.779652	0.00952964	0.779652	0.0890521	0.779652	0.118583	0.779652	0.023234	0.779652	0.0451447	0.779652	0.0226904	0.779652	0.0148702	0.779652	0.0129962	0.779652	0.0242306	0.779652	0.0178695	0.779652	0.0173975	0.779652	0.0118948	0.779652	-0.00777011	0.779652	-0.0475766	0.779652	-0.0998286	0.779652	-0.0907877
0.759651	0.015328	0.759651	0.0099676	0.759651	0.00694349	0.759651	0.0061238	0.759651	0.00748041	0.759651	0.00744274	0.759651	0.00661638	0.759651	0.0062125	0.759651	0.00629499	0.759651	0.00623465	0.759651	0.0797918	0.759651	0.110109	0.759651	0.0178934	0.759651	0.0377919	0.759651	0.0203205	0.759651	0.00851397	0.759651	0.00654464	0.759651	0.0220371	0.759651	0.0112558	0.759651	0.00987773	0.759651	0.00174761	0.759651	-0.0174928	0.759651	-0.0684717	0.759651	-0.111039	0.759651	-0.102642
0.739652	0.0124734	0.739652	0.00778273	0.739652	0.00510432	0.739652	0.00412537	0.739652	0.00554158	0.739652	0.00482203	0.739652	0.0039003	0.739652	0.00353505	0.739652	0.00336052	0.739652	0.00326659	0.739652	0.0757912	0.739652	0.102184	0.739652	0.0129486	0.739652	0.0299479	0.739652	0.0102878	0.739652	0.00280619	0.739652	0.000636578	0.739652	0.0121284	0.739652	0.00408888	0.739652	0.00341654	0.739652	-0.00796561	0.739652	-0.0266913	0.739652	-0.0823191	0.739652	-0.121811	0.739652	-0.113676
0.719651	0.0100277	0.719651	0.00587966	0.719651	0.00329615	0.719651	0.00228191	0.719651	0.00305964	0.719651	0.00241066	0.719651	0.00154758	0.719651	0.00108314	0.719651	0.000758891	0.719651	0.000522852	0.719651	0.0682905	0.719651	0.0913075	0.719651	0.00832324	0.719651	0.0261093	0.719651	0.0061059	0.719651	-0.00241518	0.719651	-0.00464678	0.719651	0.00340223	0.719651	-0.00146151	0.719651	-0.00217199	0.719651	-0.0170303	0.719651	-0.0353831	0.719651	-0.094345	0.719651	-0.132196	0.719651	-0.124205
0.699651	0.00778606	0.699651	0.0041125	0.699651	0.00171447	0.699651	0.000714545	0.699651	0.00121713	0.699651	0.000354052	0.699651	-0.000450373	0.699651	-0.00101257	0.699651	-0.0014174	0.699651	-0.00175357	0.699651	0.0661066	0.699651	0.0833348	0.699651	0.00437975	0.699651	0.0193048	0.699651	0.00228643	0.699651	-0.00670316	0.699651	-0.00905493	0.699651	-0.00297333	0.699651	-0.0063539	0.699651	-0.00767474	0.699651	-0.0253104	0.699651	-0.0432562	0.699651	-0.104382	0.699651	-0.141738	0.699651	-0.133732
0.679651	0.00588729	0.679651	0.00253941	0.679651	0.000416994	0.679651	-0.000641589	0.679651	-0.00055337	0.679651	-0.00140787	0.679651	-0.00219227	0.679651	-0.00277449	0.679651	-0.00326802	0.679651	-0.00370051	0.679651	0.0594547	0.679651	0.0770691	0.679651	0.000858073	0.679651	0.0132347	0.679651	-0.00272633	0.679651	-0.0104478	0.679651	-0.0128797	0.679651	-0.00985507	0.679651	-0.0111244	0.679651	-0.0122521	0.679651	-0.0319756	0.679651	-0.0504603	0.679651	-0.119408	0.679651	-0.150927	0.679651	-0.142911
0.659651	0.00420739	0.659651	0.00119186	0.659651	-0.000649219	0.659651	-0.00184513	0.659651	-0.00196815	0.659651	-0.00284315	0.659651	-0.0036533	0.659651	-0.00430562	0.659651	-0.00485255	0.659651	-0.00533082	0.659651	0.0531127	0.659651	0.0709513	0.659651	-0.00184131	0.659651	0.00982528	0.659651	-0.00516917	0.659651	-0.0136755	0.659651	-0.0163019	0.659651	-0.0138996	0.659651	-0.0150841	0.659651	-0.0166414	0.659651	-0.0381564	0.659651	-0.05708	0.659651	-0.125072	0.659651	-0.159634	0.659651	-0.151699
0.639729	0.00260378	0.639729	6.46114e-05	0.639729	-0.00168205	0.639729	-0.00148893	0.639729	-0.00324656	0.639729	-0.00409104	0.639729	-0.00487306	0.639729	-0.00557973	0.639729	-0.00617626	0.639729	-0.00670793	0.639729	0.0429274	0.639729	0.0629356	0.639729	-0.00432374	0.639729	0.00512838	0.639729	-0.00841836	0.639729	-0.0164545	0.639729	-0.0193036	0.639729	-0.0177935	0.639729	-0.0184959	0.639729	-0.0203994	0.639729	-0.0435666	0.639729	-0.0631883	0.639729	-0.130284	0.639729	-0.167831	0.639729	-0.159891
0.619729	0.00138116	0.619729	-0.00101734	0.619729	-0.00269152	0.619729	-0.0035236	0.619729	-0.00432326	0.619729	-0.00520541	0.619729	-0.00601842	0.619729	-0.006727	0.619729	-0.00741747	0.619729	-0.0079911	0.619729	0.0343682	0.619729	0.0614526	0.619729	-0.00633934	0.619729	0.00193357	0.619729	-0.0111859	0.619729	-0.0192106	0.619729	-0.0221613	0.619729	-0.020747	0.619729	-0.0212816	0.619729	-0.023959	0.619729	-0.048449	0.619729	-0.0690201	0.619729	-0.135377	0.619729	-0.175842	0.619729	-0.16794
0.599729	0.000291586	0.599729	-0.00189854	0.599729	-0.00352503	0.599729	-0.00449874	0.599729	-0.00523879	0.599729	-0.00618865	0.599729	-0.00700214	0.599729	-0.00776985	0.599729	-0.00850609	0.599729	-0.00910309	0.599729	0.032952	0.599729	0.0538804	0.599729	-0.00857523	0.599729	-0.00557162	0.599729	-0.014457	0.599729	-0.0217117	0.599729	-0.0247844	0.599729	-0.0235623	0.599729	-0.0250276	0.599729	-0.0273446	0.599729	-0.0531306	0.599729	-0.0744656	0.599729	-0.13975	0.599729	-0.183199	0.599729	-0.175498
0.579729	-0.000716929	0.579729	-0.00279261	0.579729	-0.0043018	0.579729	-0.00541427	0.579729	-0.0061753	0.579729	-0.00714138	0.579729	-0.00797489	0.579729	-0.00879839	0.579729	-0.00954274	0.579729	-0.00988034	0.579729	0.0315501	0.579729	0.0512959	0.579729	-0.0105274	0.579729	-0.00919798	0.579729	-0.0152357	0.579729	-0.0240992	0.579729	-0.0273684	0.579729	-0.0263012	0.579729	-0.0292553	0.579729	-0.0311497	0.579729	-0.0570133	0.579729	-0.0799301	0.579729	-0.143621	0.579729	-0.190399	0.579729	-0.182956
0.559729	-0.00151945	0.559729	-0.00358225	0.559729	-0.00504663	0.559729	-0.0062001	0.559729	-0.00694445	0.559729	-0.00801828	0.559729	-0.00891856	0.559729	-0.00974874	0.559729	-0.0105608	0.559729	-0.0110496	0.559729	0.0281168	0.559729	0.0411488	0.559729	-0.0122478	0.559729	-0.0120256	0.559729	-0.0191711	0.559729	-0.0265158	0.559729	-0.0299281	0.559729	-0.0295209	0.559729	-0.0321053	0.559729	-0.0344447	0.559729	-0.0608518	0.559729	-0.0852183	0.559729	-0.147565	0.559729	-0.197075	0.559729	-0.190113
0.539729	-0.00188471	0.539729	-0.00429274	0.539729	-0.0033033	0.539729	-0.00696686	0.539729	-0.00780228	0.539729	-0.00888136	0.539729	-0.00978879	0.539729	-0.0106786	0.539729	-0.0115269	0.539729	-0.0120957	0.539729	0.0242592	0.539729	0.0335814	0.539729	-0.0135372	0.539729	-0.0146087	0.539729	-0.02295	0.539729	-0.0288795	0.539729	-0.0324081	0.539729	-0.0325798	0.539729	-0.0348858	0.539729	-0.037876	0.539729	-0.064328	0.539729	-0.0904063	0.539729	-0.151275	0.539729	-0.203403	0.539729	-0.196746
0.519729	-0.00232244	0.519729	-0.00504329	0.519729	-0.00542428	0.519729	-0.00770596	0.519729	-0.00866726	0.519729	-0.00972632	0.519729	-0.0106557	0.519729	-0.0116098	0.519729	-0.0124958	0.519729	-0.0132254	0.519729	0.0220276	0.519729	0.0114513	0.519729	-0.017021	0.519729	-0.0181044	0.519729	-0.0236901	0.519729	-0.0311903	0.519729	-0.0348791	0.519729	-0.035551	0.519729	-0.0380396	0.519729	-0.0413207	0.519729	-0.0676897	0.519729	-0.0960044	0.519729	-0.155123	0.519729	-0.209478	0.519729	-0.203455
0.499728	-0.00222422	0.499728	-0.00570753	0.499728	-0.00651195	0.499728	-0.00841263	0.499728	-0.00944356	0.499728	-0.0105265	0.499728	-0.0115192	0.499728	-0.0125025	0.499728	-0.0134242	0.499728	-0.0142162	0.499728	0.0340964	0.499728	0.00553846	0.499728	-0.0179136	0.499728	-0.020295	0.499728	-0.0272111	0.499728	-0.0334858	0.499728	-0.0372724	0.499728	-0.0381798	0.499728	-0.0412616	0.499728	-0.0446023	0.499728	-0.0707844	0.499728	-0.101803	0.499728	-0.158752	0.499728	-0.214928	0.499728	-0.209559
0.479807	-6.98566e-05	0.479807	-0.00637748	0.479807	-0.00772694	0.479807	-0.00916222	0.479807	-0.010238	0.479807	-0.0113557	0.479807	-0.0123938	0.479807	-0.0133937	0.479807	-0.0143574	0.479807	-0.0152023	0.479807	0.0294519	0.479807	0.00149012	0.479807	-0.0196784	0.479807	-0.0234412	0.479807	-0.0281843	0.479807	-0.0359086	0.479807	-0.0398726	0.479807	-0.0409102	0.479807	-0.0442991	0.479807	-0.0479149	0.479807	-0.0738886	0.479807	-0.106752	0.479807	-0.162547	0.479807	-0.220378	0.479807	-0.215672
0.459806	-0.000843768	0.459806	-0.00702122	0.459806	-0.00842026	0.459806	-0.00985173	0.459806	-0.0110004	0.459806	-0.0121778	0.459806	-0.0132216	0.459806	-0.0142739	0.459806	-0.0152958	0.459806	-0.016156	0.459806	0.0250031	0.459806	-0.00105143	0.459806	-0.0215429	0.459806	-0.0263399	0.459806	-0.0329779	0.459806	-0.038195	0.459806	-0.0423688	0.459806	-0.0434641	0.459806	-0.0473327	0.459806	-0.0511746	0.459806	-0.0768068	0.459806	-0.117395	0.459806	-0.166257	0.459806	-0.225404	0.459806	-0.221342
0.439806	0.000674491	0.439806	-0.00759914	0.439806	-0.00906495	0.439806	-0.0105293	0.439806	-0.0117476	0.439806	-0.0129741	0.439806	-0.0140675	0.439806	-0.0151923	0.439806	-0.0162213	0.439806	-0.0171393	0.439806	0.0171924	0.439806	-0.00168085	0.439806	-0.0234822	0.439806	-0.0294059	0.439806	-0.0357837	0.439806	-0.0406031	0.439806	-0.0448736	0.439806	-0.0464048	0.439806	-0.0512671	0.439806	-0.0544335	0.439806	-0.0795391	0.439806	-0.118754	0.439806	-0.169819	0.439806	-0.230149	0.439806	-0.226897
0.419806	-0.00118232	0.419806	-0.00821618	0.419806	-0.0097125	0.419806	-0.0112398	0.419806	-0.0125115	0.419806	-0.0137709	0.419806	-0.0149253	0.419806	-0.0160807	0.419806	-0.0171831	0.419806	-0.0181339	0.419806	0.0133777	0.419806	-0.0063875	0.419806	-0.0255245	0.419806	-0.0310467	0.419806	-0.0380754	0.419806	-0.0429935	0.419806	-0.0474486	0.419806	-0.0490107	0.419806	-0.0535752	0.419806	-0.0576046	0.419806	-0.0825432	0.419806	-0.121382	0.419806	-0.173262	0.419806	-0.234741	0.419806	-0.232271
0.399806	-0.00177408	0.399806	-0.00876168	0.399806	-0.0103109	0.399806	-0.011906	0.399806	-0.0132368	0.399806	-0.0145705	0.399806	-0.0157412	0.399806	-0.0169609	0.399806	-0.0180877	0.399806	-0.0190747	0.399806	0.00975375	0.399806	-0.0100849	0.399806	-0.0275243	0.399806	-0.033728	0.399806	-0.0403709	0.399806	-0.0454172	0.399806	-0.0500254	0.399806	-0.0521187	0.399806	-0.0583007	0.399806	-0.060766	0.399806	-0.0855855	0.399806	-0.124343	0.399806	-0.176409	0.399806	-0.238841	0.399806	-0.237254
0.379807	-0.00172592	0.379807	-0.00933198	0.379807	-0.0109289	0.379807	-0.0125473	0.379807	-0.0139869	0.379807	-0.015363	0.379807	-0.0165938	0.379807	-0.0178803	0.379807	-0.0190252	0.379807	-0.0200771	0.379807	0.00564337	0.379807	-0.0124391	0.379807	-0.0295724	0.379807	-0.0361089	0.379807	-0.0427789	0.379807	-0.0478925	0.379807	-0.0526978	0.379807	-0.0549247	0.379807	-0.0596788	0.379807	-0.0640132	0.379807	-0.0881508	0.379807	-0.127256	0.379807	-0.179446	0.379807	-0.242985	0.379807	-0.242189
0.359806	-0.00171876	0.359806	-0.00990561	0.359806	-0.0115302	0.359806	-0.0132497	0.359806	-0.0147269	0.359806	-0.0161565	0.359806	-0.0174502	0.359806	-0.0187882	0.359806	-0.0199788	0.359806	-0.021067	0.359806	0.00247717	0.359806	-0.0143617	0.359806	-0.0314397	0.359806	-0.0387353	0.359806	-0.0450696	0.359806	-0.0504837	0.359806	-0.0553157	0.359806	-0.057905	0.359806	-0.0624635	0.359806	-0.0672462	0.359806	-0.0910214	0.359806	-0.13026	0.359806	-0.182374	0.359806	-0.246771	0.359806	-0.24679
0.339884	-0.00162387	0.339884	-0.0104583	0.339884	-0.0121553	0.339884	-0.013963	0.339884	-0.0154965	0.339884	-0.0169914	0.339884	-0.0183237	0.339884	-0.0197171	0.339884	-0.0209659	0.339884	-0.0221098	0.339884	-0.00188423	0.339884	-0.0165027	0.339884	-0.0335177	0.339884	-0.0415677	0.339884	-0.0467967	0.339884	-0.0530745	0.339884	-0.0580337	0.339884	-0.060828	0.339884	-0.0659397	0.339884	-0.0703981	0.339884	-0.0939969	0.339884	-0.133389	0.339884	-0.18523	0.339884	-0.250567	0.339884	-0.251349
0.319884	-0.0015595	0.319884	-0.01105	0.319884	-0.0127995	0.319884	-0.014664	0.319884	-0.0162562	0.319884	-0.0178602	0.319884	-0.019235	0.319884	-0.0206846	0.319884	-0.0220078	0.319884	-0.0231899	0.319884	-0.00421263	0.319884	-0.0183929	0.319884	-0.0357431	0.319884	-0.0437502	0.319884	-0.050137	0.319884	-0.0558402	0.319884	-0.0609567	0.319884	-0.0639846	0.319884	-0.0693348	0.319884	-0.0738266	0.319884	-0.0966577	0.319884	-0.136593	0.319884	-0.187896	0.319884	-0.254005	0.319884	-0.255731
0.299884	-0.00023675	0.299884	-0.0116022	0.299884	-0.0134204	0.299884	-0.0153545	0.299884	-0.0170534	0.299884	-0.018689	0.299884	-0.0201119	0.299884	-0.0216482	0.299884	-0.0229753	0.299884	-0.0241812	0.299884	-0.00813702	0.299884	-0.0212019	0.299884	-0.0380067	0.299884	-0.0461745	0.299884	-0.0526549	0.299884	-0.0584962	0.299884	-0.0637224	0.299884	-0.0670888	0.299884	-0.0725344	0.299884	-0.0771692	0.299884	-0.0999574	0.299884	-0.139549	0.299884	-0.191019	0.299884	-0.257085	0.299884	-0.259741
0.279884	0.00351979	0.279884	-0.0121711	0.279884	-0.014088	0.279884	-0.0160792	0.279884	-0.0178641	0.279884	-0.0196384	0.279884	-0.0211004	0.279884	-0.0226415	0.279884	-0.0240282	0.279884	-0.0253089	0.279884	-0.0121439	0.279884	-0.0251182	0.279884	-0.0403165	0.279884	-0.0488185	0.279884	-0.0553205	0.279884	-0.0614526	0.279884	-0.0668457	0.279884	-0.0703028	0.279884	-0.0757483	0.279884	-0.0808409	0.279884	-0.103147	0.279884	-0.142682	0.279884	-0.193375	0.279884	-0.260213	0.279884	-0.263823
0.259884	-0.00439252	0.259884	-0.0128019	0.259884	-0.0147703	0.259884	-0.0168517	0.259884	-0.0187081	0.259884	-0.0204695	0.259884	-0.0220617	0.259884	-0.0236591	0.259884	-0.0251163	0.259884	-0.0264333	0.259884	-0.0107568	0.259884	-0.0278243	0.259884	-0.042623	0.259884	-0.0513505	0.259884	-0.0579097	0.259884	-0.064409	0.259884	-0.0698355	0.259884	-0.0738028	0.259884	-0.0795677	0.259884	-0.0845412	0.259884	-0.106338	0.259884	-0.151065	0.259884	-0.19563	0.259884	-0.263012	0.259884	-0.267681
0.239883	-0.010052	0.239883	-0.0134461	0.239883	-0.0154651	0.239883	-0.0176628	0.239883	-0.019585	0.239883	-0.0213736	0.239883	-0.0230964	0.239883	-0.0247363	0.239883	-0.0262321	0.239883	-0.0276126	0.239883	-0.0144041	0.239883	-0.0321544	0.239883	-0.0451388	0.239883	-0.0541141	0.239883	-0.0608757	0.239883	-0.0673511	0.239883	-0.0731352	0.239883	-0.0772932	0.239883	-0.0833062	0.239883	-0.0884655	0.239883	-0.109637	0.239883	-0.152515	0.239883	-0.198005	0.239883	-0.266064	0.239883	-0.271524
0.219884	-0.0108011	0.219884	-0.0140794	0.219884	-0.0162657	0.219884	-0.0184901	0.219884	-0.0205191	0.219884	-0.0224155	0.219884	-0.024124	0.219884	-0.025832	0.219884	-0.0274266	0.219884	-0.028848	0.219884	-0.0185817	0.219884	-0.0347904	0.219884	-0.0477538	0.219884	-0.057018	0.219884	-0.0638368	0.219884	-0.070546	0.219884	-0.0764349	0.219884	-0.0810173	0.219884	-0.0871304	0.219884	-0.0922183	0.219884	-0.11288	0.219884	-0.155595	0.219884	-0.200451	0.219884	-0.268692	0.219884	-0.275344
0.199962	-0.0115092	0.199962	-0.0147904	0.199962	-0.0169767	0.199962	-0.0193032	0.199962	-0.0214375	0.199962	-0.0234617	0.199962	-0.0251683	0.199962	-0.0269941	0.199962	-0.0286397	0.199962	-0.0300463	0.199962	-0.0237301	0.199962	-0.0377544	0.199962	-0.0504255	0.199962	-0.060003	0.199962	-0.0671079	0.199962	-0.073798	0.199962	-0.0797871	0.199962	-0.0847605	0.199962	-0.0912789	0.199962	-0.0964812	0.199962	-0.116084	0.199962	-0.160263	0.199962	-0.202888	0.199962	-0.271238	0.199962	-0.27901
0.179961	-0.0121658	0.179961	-0.0154675	0.179961	-0.0178211	0.179961	-0.0202344	0.179961	-0.0224389	0.179961	-0.0245422	0.179961	-0.0263642	0.179961	-0.0282568	0.179961	-0.0299343	0.179961	-0.0314249	0.179961	-0.0272282	0.179961	-0.0411433	0.179961	-0.053375	0.179961	-0.0632503	0.179961	-0.0702932	0.179961	-0.0776985	0.179961	-0.0834349	0.179961	-0.0889615	0.179961	-0.0954751	0.179961	-0.101087	0.179961	-0.119703	0.179961	-0.162676	0.179961	-0.205344	0.179961	-0.273961	0.179961	-0.282725
0.159962	-0.0129588	0.159962	-0.0162404	0.159962	-0.0194324	0.159962	-0.0211929	0.159962	-0.0235103	0.159962	-0.0257033	0.159962	-0.0276021	0.159962	-0.0295342	0.159962	-0.0312961	0.159962	-0.0329079	0.159962	-0.0304674	0.159962	-0.0442228	0.159962	-0.056565	0.159962	-0.066736	0.159962	-0.0736645	0.159962	-0.0808027	0.159962	-0.0872925	0.159962	-0.0933484	0.159962	-0.0996284	0.159962	-0.105794	0.159962	-0.123203	0.159962	-0.165017	0.159962	-0.207814	0.159962	-0.276664	0.159962	-0.286325
0.139961	-0.0137637	0.139961	-0.017083	0.139961	-0.019635	0.139961	-0.0222481	0.139961	-0.0246404	0.139961	-0.0269021	0.139961	-0.0289272	0.139961	-0.0309185	0.139961	-0.0327786	0.139961	-0.0344576	0.139961	-0.0335277	0.139961	-0.0464925	0.139961	-0.0607898	0.139961	-0.0704077	0.139961	-0.077875	0.139961	-0.0846842	0.139961	-0.0912264	0.139961	-0.0975303	0.139961	-0.10401	0.139961	-0.110515	0.139961	-0.126923	0.139961	-0.167564	0.139961	-0.210265	0.139961	-0.279268	0.139961	-0.289901
0.119962	-0.014592	0.119962	-0.0179771	0.119962	-0.0206159	0.119962	-0.0233487	0.119962	-0.0258587	0.119962	-0.0282305	0.119962	-0.0303386	0.119962	-0.0323986	0.119962	-0.034285	0.119962	-0.0360283	0.119962	-0.036775	0.119962	-0.0475616	0.119962	-0.0640275	0.119962	-0.0741842	0.119962	-0.0812701	0.119962	-0.0888375	0.119962	-0.095437	0.119962	-0.101979	0.119962	-0.108707	0.119962	-0.115254	0.119962	-0.130499	0.119962	-0.170482	0.119962	-0.212844	0.119962	-0.281824	0.119962	-0.293664
0.0999613	-0.0154608	0.0999613	-0.0189355	0.0999613	-0.0217155	0.0999613	-0.0245326	0.0999613	-0.027129	0.0999613	-0.0296143	0.0999613	-0.031814	0.0999613	-0.0339674	0.0999613	-0.0359668	0.0999613	-0.0377177	0.0999613	-0.0399441	0.0999613	-0.0445284	0.0999613	-0.067313	0.0999613	-0.0782517	0.0999613	-0.0875166	0.0999613	-0.0936869	0.0999613	-0.0999621	0.0999613	-0.106562	0.0999613	-0.113652	0.0999613	-0.120414	0.0999613	-0.134271	0.0999613	-0.173267	0.0999613	-0.215462	0.0999613	-0.28447	0.0999613	-0.297302
0.0799608	-0.0163997	0.0799608	-0.0199717	0.0799608	-0.0228966	0.0799608	-0.0257391	0.0799608	-0.0285252	0.0799608	-0.0312155	0.0799608	-0.0334543	0.0799608	-0.0356492	0.0799608	-0.0377211	0.0799608	-0.0395969	0.0799608	-0.0442061	0.0799608	-0.0503153	0.0799608	-0.0710943	0.0799608	-0.0828818	0.0799608	-0.0905016	0.0799608	-0.0981597	0.0799608	-0.104778	0.0799608	-0.111602	0.0799608	-0.118607	0.0799608	-0.125611	0.0799608	-0.144861	0.0799608	-0.17639	0.0799608	-0.218089	0.0799608	-0.287322	0.0799608	-0.300978
0.0600395	-0.0173505	0.0600395	-0.02116	0.0600395	-0.0243405	0.0600395	-0.0271076	0.0600395	-0.0299948	0.0600395	-0.0327457	0.0600395	-0.0350846	0.0600395	-0.0374173	0.0600395	-0.0395831	0.0600395	-0.0415024	0.0600395	-0.0480418	0.0600395	-0.0591495	0.0600395	-0.0749329	0.0600395	-0.0868252	0.0600395	-0.0998668	0.0600395	-0.103195	0.0600395	-0.109709	0.0600395	-0.116828	0.0600395	-0.124286	0.0600395	-0.13079	0.0600395	-0.14459	0.0600395	-0.179427	0.0600395	-0.220884	0.0600395	-0.289978	0.0600395	-0.304455
0.0400391	-0.0183695	0.0400391	-0.0223559	0.0400391	-0.0256709	0.0400391	-0.0285619	0.0400391	-0.0315717	0.0400391	-0.0343942	0.0400391	-0.0368947	0.0400391	-0.0393056	0.0400391	-0.041511	0.0400391	-0.0435399	0.0400391	-0.0520215	0.0400391	-0.064862	0.0400391	-0.0790957	0.0400391	-0.0908545	0.0400391	-0.101722	0.0400391	-0.108092	0.0400391	-0.115097	0.0400391	-0.122526	0.0400391	-0.129893	0.0400391	-0.137122	0.0400391	-0.145434	0.0400391	-0.182656	0.0400391	-0.223559	0.0400391	-0.292791	0.0400391	-0.308193
0.0200396	-0.0194672	0.0200396	-0.0234993	0.0200396	-0.0269345	0.0200396	-0.0300368	0.0200396	-0.0331754	0.0200396	-0.0361628	0.0200396	-0.0387224	0.0200396	-0.0412611	0.0200396	-0.043558	0.0200396	-0.045556	0.0200396	-0.0558545	0.0200396	-0.069721	0.0200396	-0.0832251	0.0200396	-0.0949553	0.0200396	-0.106013	0.0200396	-0.11339	0.0200396	-0.120514	0.0200396	-0.127829	0.0200396	-0.135549	0.0200396	-0.142777	0.0200396	-0.147169	0.0200396	-0.185703	0.0200396	-0.226444	0.0200396	-0.295657	0.0200396	-0.311745
[truncated: 110 more columns]
